# Supplementary material for: A ubiquitination-related risk model for predicting the prognosis and immunotherapy response of gastric adenocarcinoma patients
Source: PeerJ journal article supplement (doi:10.7717/peerj.16868), 2024-01-31
Supplement: Figure_8A.zip [file Figure_8A.zip]

## Sheet: RNF144A
sample	actin Ct	RNF144A ct	△Ct	sample	actin Ct	RNF144A ct	△Ct	-△△Ct	2-△△Ct	Average	SD
A	21.5333	26.5167	4.98333	A	21.54	26.52	4.98	0.00333333	1.00231
A	21.5333	26.5167	4.98333	A	21.51	26.52	5.01	-0.0266667	0.981686
A	21.5333	26.5167	4.98333	A	21.55	26.51	4.96	0.0233333	1.0163	1.0001	0.0174152
A	21.5333	26.5167	4.98333	B	21.63	27.23	5.6	-0.616667	0.652176
A	21.5333	26.5167	4.98333	B	21.49	27.23	5.74	-0.756667	0.591862
A	21.5333	26.5167	4.98333	B	21.6	27.29	5.69	-0.706667	0.612734	0.618924	0.0306296
A	21.5333	26.5167	4.98333	C	21.41	28.18	6.77	-1.78667	0.289841
A	21.5333	26.5167	4.98333	C	21.49	28.18	6.69	-1.70667	0.306367
A	21.5333	26.5167	4.98333	C	21.41	28.14	6.73	-1.74667	0.297989	0.298066	0.00826335
A	21.5333	26.5167	4.98333	D	21.64	26.81	5.17	-0.186667	0.878633
A	21.5333	26.5167	4.98333	D	21.67	26.79	5.12	-0.136667	0.909618
A	21.5333	26.5167	4.98333	D	21.64	26.74	5.1	-0.116667	0.922316	0.903523	0.0224703
																Group
													A	1.0001	0.0174152	NC
													B	0.618924	0.0306296	si-RNF144A-1
													C	0.298066	0.00826335	si-RNF144A-2
													D	0.903523	0.0224703	si-RNF144A-3
