# Supplementary material for: A ubiquitination-related risk model for predicting the prognosis and immunotherapy response of gastric adenocarcinoma patients
Source: PeerJ journal article supplement (doi:10.7717/peerj.16868), 2024-01-31
Supplement: Figures_8E_and_8F.zip [file Figures_8E_and_8F.zip]

## Sheet: Sheet1
				Group	MKN-7 cell Invasion number	Average
				MKN-7-NC-1	84	71
				MKN-7-NC-2	68
				MKN-7-NC-3	71
				MKN-7-RNF144Asi-1-1	55	43
				MKN-7-RNF144Asi-1-2	36
				MKN-7-RNF144Asi-1-3	44
				MKN-7-RNF144Asi-2-1	32	30
				MKN-7-RNF144Asi-2-2	34
				MKN-7-RNF144Asi-2-3	29
