# Supplementary material for: A ubiquitination-related risk model for predicting the prognosis and immunotherapy response of gastric adenocarcinoma patients
Source: PeerJ journal article supplement (doi:10.7717/peerj.16868), 2024-01-31
Supplement: Supplementary_Tables.zip [file Supplementary_Tables.zip]

## Sheet: ub.gene_exp
symbols	TCGA-D7-5577-01A	TCGA-D7-6818-01A	TCGA-BR-4280-01A	TCGA-D7-8572-01A	TCGA-VQ-A91Z-01A	TCGA-HU-A4HD-01A	TCGA-D7-8573-01A	TCGA-BR-7959-01A	TCGA-BR-8679-01A	TCGA-CG-5726-01A	TCGA-BR-6453-01A	TCGA-BR-A4QL-01A	TCGA-VQ-AA6A-01A	TCGA-HF-7132-01A	TCGA-BR-A4IV-01A	TCGA-CG-5718-01A	TCGA-BR-8296-01A	TCGA-R5-A7ZR-01A	TCGA-HU-A4GY-11A	TCGA-BR-8680-01A	TCGA-VQ-A8P2-01A	TCGA-CD-8533-01A	TCGA-IP-7968-11A	TCGA-RD-A8N2-01A	TCGA-VQ-A92D-01A	TCGA-CG-5721-11A	TCGA-HU-A4GT-01A	TCGA-ZA-A8F6-01A	TCGA-D7-A74A-01A	TCGA-IN-A7NR-01A	TCGA-HU-A4H2-01A	TCGA-BR-6456-01A	TCGA-CG-4442-01A	TCGA-CD-8524-01A	TCGA-VQ-A8PO-01A	TCGA-BR-7717-01A	TCGA-CG-4475-01A	TCGA-BR-4369-01A	TCGA-HU-A4GH-11A	TCGA-HU-A4GP-01A	TCGA-VQ-A94R-01A	TCGA-VQ-A91E-01A	TCGA-HU-A4GP-11A	TCGA-HU-A4GD-01A	TCGA-FP-8211-01A	TCGA-D7-A747-01A	TCGA-KB-A93G-01A	TCGA-RD-A8MV-01A	TCGA-BR-4256-01A
ACTB	11.262	10.9498	10.3145	11.1915	9.19264	10.694	11.0564	11.0583	10.6886	11.2862	10.7222	10.9584	11.7242	10.5765	11.8632	10.5678	11.008	11.0466	11.9448	11.2563	10.6268	10.0574	11.151	12.2677	11.8675	10.1447	11.1925	11.2217	11.3705	10.9809	11.266	11.5115	10.769	11.6862	11.765	11.4133	10.1255	10.2055	11.8578	11.7437	10.6695	11.2057	11.9867	10.6055	10.9983	12.0267	10.9117	11.1221	10.9965
ACTL6A	3.57393	2.98647	4.54699	3.89649	5.23855	4.59117	3.98334	3.1956	4.45281	4.11456	3.37878	4.33426	4.27434	3.46254	2.75121	3.25289	4.48374	3.92284	2.56189	4.57842	4.58916	4.27217	2.60639	2.32158	3.96101	2.59874	4.21583	3.1621	4.33653	3.00405	4.18299	4.29486	4.29659	4.02975	4.30089	3.50206	4.29449	4.39043	2.67197	3.893	3.93854	4.05088	2.70707	4.62218	4.94169	2.54516	2.88092	3.70474	3.94047
ACTR5	2.40652	1.94985	2.84836	2.84429	3.3363	3.21634	5.04733	2.56992	3.34585	3.07299	2.46043	2.46624	2.7219	2.55767	1.82097	3.27066	2.84304	2.17237	1.68525	2.55146	3.50602	2.96904	1.19071	1.44669	2.23469	1.5572	2.13876	2.06151	2.33286	2.12228	2.88019	2.75846	2.22703	2.42978	2.63618	2.65449	2.76871	3.5349	1.73257	2.43392	3.31385	2.53279	1.78655	2.83511	2.56494	1.92903	2.21452	3.14509	2.2909
ACTR8	2.38985	2.34983	2.81256	2.85044	3.36622	2.76677	2.9158	2.37293	2.12095	2.47624	2.19609	2.00833	2.37874	2.52385	2.48429	1.91634	2.07849	2.14803	1.83735	2.73875	2.42744	2.92668	2.05003	2.18511	2.41522	2.04431	2.01244	2.43242	2.29673	1.84334	2.23089	2.21141	2.87349	2.08506	1.89557	1.75388	2.73062	2.79796	2.06129	1.98917	2.62278	3.00615	1.95361	1.68983	2.42496	2.06812	2.53158	2.53299	2.64183
ADRB2	0.52476	0.525538	0.157949	0.644008	0.176527	0.252974	0.0607364	0.346877	0.227847	0.148109	1.49439	0.0768538	0.24117	1.03691	1.26884	0.520421	0.636868	0.120491	1.78598	0.327251	0.108104	0.113517	1.85589	1.28875	0.0521012	2.09081	0.0398374	1.36461	0.152196	1.64452	0.187191	0.81047	0.206758	0.516998	0.187339	0.351084	0.310359	0.489577	1.28445	0.256361	0.285803	0.433041	1.72492	0.271158	0.486378	1.25787	0.324838	0.659477	0.736275
ADRM1	6.42658	5.39839	5.73712	5.98699	5.73358	6.23132	6.3276	5.54568	6.42179	6.8286	5.84086	5.71845	6.40243	5.37806	4.83142	7.18176	6.27843	5.91518	4.82099	5.59273	6.08933	5.91333	5.14301	4.59508	5.79215	5.09237	5.52124	5.13274	5.98594	5.63039	6.12139	6.5913	4.51124	6.40098	5.84206	6.4016	5.78547	6.03419	4.6427	5.93599	5.76491	5.67456	4.82323	6.13859	5.94654	4.99246	5.2385	5.66441	5.47028
AIRE	0.0192795	0.0413469	0.0122333	0.114799	0.0504418	0.0108132	0.00910247	0.112867	0.0110795	0.00545634	0.135431	0	0.0427321	0.0489558	0.0330171	0.0346734	0.18242	0.0122795	0.0422599	0.0352733	0.00549759	1.43956	0	0.0275957	0.0281221	0	0.012685	0.0318956	0.0225418	0.0140433	0.0340255	0.056921	0.0216524	0.0367331	0.0250219	0.00550931	0.0166157	1.26101	0.0135492	0.323994	0.0434589	0.0377168	0.0487674	0.992199	0.0289235	0.398151	0.0361082	0.0212458	0.0142419
AMFR	3.72142	3.8532	3.78116	3.77742	3.91695	3.36067	4.11146	4.02431	3.64211	3.86187	4.2292	3.25077	3.64556	4.35552	4.0305	3.32929	4.20693	3.44803	4.21155	4.49436	4.39703	4.11186	4.43287	3.74727	3.65102	3.21298	3.99116	4.22735	3.7787	4.36325	3.59009	4.0107	3.41777	3.65087	4.41643	3.46673	3.39689	3.3857	3.96594	3.33719	4.07616	4.01625	4.14287	3.38235	4.31394	3.8875	3.65527	3.37826	3.99747
ANAPC1	1.69246	1.11587	2.53914	2.4493	1.98833	1.64638	2.36926	2.09242	2.49317	1.83688	1.03159	1.231	1.89294	2.13926	1.2151	1.76937	2.07776	1.55129	1.39954	2.11684	1.60393	2.29157	1.18735	1.37966	1.80393	0.777511	1.85742	1.85632	1.75569	1.57253	1.67675	1.74502	2.47426	1.11075	1.74943	1.19321	1.93389	2.61117	1.34867	2.16872	2.06835	1.9171	1.26506	2.62043	1.60025	1.35298	1.55697	1.9177	2.1396
ANAPC10	1.90674	1.41483	2.36648	1.40729	1.37619	1.52306	1.49303	1.43708	1.82061	1.77041	1.7656	2.20371	1.86275	1.7289	1.59687	1.27622	1.48831	1.57675	1.9364	2.16332	2.2437	1.65459	1.72169	1.67328	1.83841	1.42997	2.20727	1.62928	1.82154	1.89958	1.49731	1.78701	2.46249	1.71682	1.73232	2.05938	2.91451	2.49022	1.72567	1.65585	1.32365	1.44902	1.78105	2.00459	1.31541	1.8558	1.18876	2.60073	2.05501
ANAPC11	4.46039	3.79632	3.47247	2.97127	4.50182	3.88728	3.80576	2.62334	3.56478	3.6018	3.61425	4.19308	2.95825	3.30844	3.00514	4.11341	3.78176	4.61346	3.5925	3.59281	3.5233	3.06986	3.2653	2.77721	2.77628	3.98131	3.93588	3.31225	3.96498	3.89803	3.26518	3.55814	2.90931	3.80812	3.68353	3.63437	4.28683	2.68221	3.29949	3.08069	3.91929	3.34577	3.12332	3.37608	3.99012	3.04916	3.01534	3.38521	3.66356
ANAPC13	4.14573	4.1555	4.80773	4.36691	4.80639	5.1414	4.80886	3.70995	4.17605	4.91216	4.29566	5.05583	4.60892	4.26538	4.72241	4.1973	4.14447	4.81663	4.43063	4.78526	4.93595	5.16947	3.83441	4.23327	3.88501	4.66449	4.87746	4.47881	4.41139	5.20648	5.1635	4.20544	5.10549	4.56156	4.12472	4.18949	5.21308	5.12121	4.28491	4.80599	4.48982	4.97483	4.43878	4.92564	3.94588	4.65864	4.44857	3.96816	4.96775
ANAPC2	3.24263	3.41963	2.7181	3.07842	4.07774	3.49834	3.04081	3.14102	2.60156	3.51021	2.93123	2.70118	3.22187	3.42348	2.65312	3.53538	3.17069	1.9401	2.61995	3.22181	3.06483	3.22748	2.43325	2.1874	3.08558	2.21507	2.63002	2.76627	2.13662	2.48418	3.27069	3.20412	2.06298	2.99935	3.61221	2.89665	3.25709	2.86022	2.66517	3.22661	3.20749	3.36891	2.46239	2.85526	3.02115	2.8909	3.24328	3.24669	2.19216
ANAPC4	1.68825	1.18008	2.28596	2.14931	2.29248	1.93273	1.79713	1.47893	2.04715	1.62806	1.43483	2.3156	1.96796	2.17031	1.92181	1.52098	1.49983	1.46371	1.94161	2.56985	1.79355	1.68129	1.30161	1.93392	2.13919	1.04709	1.93246	1.9301	1.09382	1.94999	1.83939	1.6869	2.41868	1.88738	2.36915	1.2146	2.30265	2.05869	1.97574	1.70635	2.49896	2.38926	2.01814	2.41944	1.80185	1.93583	1.89915	2.18046	2.00215
ANAPC5	2.97092	3.25909	3.42982	3.0851	3.1618	2.72822	3.59645	2.49591	3.2216	3.21001	2.75904	3.14672	3.25323	3.10545	2.78731	2.80454	3.11987	3.57822	2.43312	2.97036	3.27896	3.47512	2.50802	2.31532	3.86133	2.54646	3.24597	2.78195	3.91989	2.68642	2.67779	3.04521	3.31679	2.95284	3.27342	3.51677	2.71084	3.26287	2.36512	2.70803	3.78941	3.7647	2.30374	3.33994	1.98944	2.94177	3.18	2.79803	3.04126
ANAPC7	2.68295	2.33024	3.18392	2.71425	3.40416	2.56447	2.79236	2.72706	2.9844	2.73251	2.52892	2.46476	3.04567	2.81757	2.33301	2.704	2.83272	2.60661	2.46045	3.36782	2.71262	2.97643	2.51096	2.33249	3.14375	1.75526	2.75928	2.33271	3.29743	3.04563	2.6673	2.58263	3.05441	2.80337	2.85014	3.07733	2.74934	3.33796	2.33558	2.57039	3.26645	2.72481	2.36794	3.50083	1.99751	2.55507	2.66357	3.17514	2.64889
ANKZF1	2.24603	1.81102	3.23901	2.69752	3.34527	2.47833	2.52216	2.29046	2.83182	2.10515	2.16295	2.5477	2.39798	2.45919	2.01005	2.86925	2.70916	2.10984	1.86241	3.03203	2.23477	3.3601	1.78522	1.57811	3.01877	1.37005	2.47847	2.38777	2.51705	2.20068	2.67556	2.94823	2.43802	2.79662	2.72629	1.94667	2.2009	2.834	1.69003	1.90441	2.86828	2.96491	1.77954	2.48754	2.38645	2.1626	2.13376	2.41712	1.59695
APC	1.69049	1.70204	2.50359	2.56379	1.49081	1.8907	2.1699	2.03256	2.4029	2.00698	1.50783	1.40066	1.97529	2.75784	2.29859	0.796604	2.08172	1.78968	2.63209	1.63018	2.51978	2.24948	1.99617	2.69207	3.0774	1.24134	2.34053	2.44417	2.08701	2.08302	1.51526	2.36995	2.59512	1.66683	2.34609	1.23504	2.71163	2.71171	2.80617	1.89141	2.50762	2.38872	2.62627	2.05228	1.33017	2.54637	2.63115	2.48643	2.53897
AR	0.0693772	0.323685	0.0602078	0.391167	0.0357039	0.119145	0.0541425	0.884519	0.197611	0.0316785	0.2668	0.0250449	0.105756	0.360059	0.875466	0.0907135	0.31127	0.00225612	2.13445	0.157347	0.061209	0.811292	0.492169	1.43651	0.128033	0.220543	0.0742591	0.686401	0.0902904	0.653609	0.07264	0.778857	0.172944	0.602586	0.0924778	0.28518	1.64831	0.476661	1.8264	0.0882577	0.848962	0.0351869	1.6783	0.218105	0.106044	0.701208	0.680991	0.0329304	0.833313
AREL1	3.01875	2.65949	3.28549	3.62618	3.23176	2.72396	3.26263	2.63461	3.39272	2.94519	2.40009	1.83321	3.35547	3.43827	2.16642	2.14804	3.02693	2.52478	1.67705	3.37156	2.62558	3.07751	2.38787	1.87343	3.89506	2.23777	2.64034	2.67873	2.79856	2.8402	2.72297	3.07618	3.20179	2.2754	3.03776	2.08747	3.00229	2.97553	1.62284	2.68157	3.55643	3.20867	1.45841	2.74468	3.28292	2.1551	3.11063	2.94481	3.09152
ARIH2	3.00418	2.55727	3.2022	3.50931	3.53824	3.04439	3.06932	2.86093	2.62462	2.95672	2.64617	2.47015	2.56046	3.25631	3.19265	2.81817	2.80907	3.46537	3.50939	2.79707	3.12789	3.08014	2.60329	3.30612	2.67348	1.92812	2.87005	2.96377	2.93527	2.5753	3.13243	2.63687	3.55883	2.74871	2.8128	2.44078	3.37739	3.10591	3.25116	3.09676	3.22367	3.35018	3.35045	2.85693	2.80129	3.18097	2.95331	2.98528	3.38921
ARRB1	2.67791	3.26387	3.31066	2.82332	1.59618	3.00904	1.95154	2.76864	2.72881	4.31689	3.76255	2.73218	3.2672	4.03057	2.83941	2.99516	2.84067	2.70103	4.26857	2.45903	3.65141	2.84708	1.90675	3.24241	2.48739	3.32601	3.1855	3.93119	2.56979	2.87502	3.75023	3.4161	1.41133	2.07613	2.65937	3.21455	2.38119	2.89828	4.16066	3.07136	3.13226	3.44805	4.40712	1.67754	2.16526	2.99818	2.57567	3.57455	2.79734
ARRB2	3.89358	4.52197	3.97798	3.89557	2.60088	3.5591	2.74246	2.99281	3.20885	4.35224	4.92034	3.02204	3.26964	3.32849	2.87953	5.59692	3.23597	3.3558	2.28345	3.06521	4.44716	3.68086	2.42188	2.55668	3.30914	3.52804	4.15466	3.85669	3.28316	2.75178	4.06134	3.61663	2.52731	3.55192	3.70864	3.53542	3.67277	3.57033	2.52911	2.39261	4.37933	3.27468	2.46043	3.36039	2.37692	3.08687	3.84793	3.89276	3.9123
ASB1	1.57204	1.7089	1.29155	2.06748	2.84589	1.51394	1.46995	2.11459	2.04084	1.57218	1.89083	1.23498	1.85011	1.9512	2.79965	2.21397	1.84248	1.64065	2.45551	2.46239	1.64759	1.95412	1.48205	2.53341	2.0132	1.50375	1.39396	2.17892	1.84828	1.81789	1.69998	1.80763	2.02557	2.05772	1.96048	1.73381	1.95857	2.58475	2.47432	1.50107	2.53613	1.31073	2.70402	1.63225	1.61358	2.32048	3.16078	1.73032	1.85216
ASB10	0	0	0.00804357	0.0357618	0.00775693	0	0	0	0	0	0	0	0.00774532	0	0.023725	0.0389678	0.0568958	0	0	0	0	0.0179106	0	0	0	0	0	0	0	0	0	0	0	0.00730961	0	0	0	0.00946346	0.0440108	0.00751203	0.00787869	0	0.00696163	0.201483	0	0.152234	0.00798004	0	0
ASB11	0.0567022	0.0155386	0.0181876	0.0537602	0.0117181	0.0359316	0.0664643	0.0145021	0.032765	0	0	0.00539956	0.068821	0.102269	0.00451623	0.00744966	0.536342	0	0.158659	0.0668258	0.00818273	0.0923976	0.00846734	0.0206062	0.00527878	1.83738	0.0188577	0.0271978	0.0067535	0.101467	0.0368305	0.124238	0.0241722	0.0110432	0.00625358	0.024462	0.0368708	0.0284434	0.0725099	0.0830154	0.017816	0.0205553	0.0313271	0.41359	0.0786494	0.144333	0.234138	0.0237187	0.0253631
ASB12	0.0462108	0.337754	0.154862	0.0810727	0.562474	0.10445	0.271104	0.251847	0.03981	0.0197043	0.44062	0.62192	0.542255	0.259234	0.15648	0.187419	0.103149	0	0.404508	0.190494	0.0198525	0.737677	0.457141	0.144216	0.181349	0.049393	0	0.455095	0.0486409	0.615874	0.0336815	0.310269	0.302446	0.104165	0.145118	0.0968382	0.312346	0.54674	0.242006	0.518887	0.0847963	0.12087	0.321406	0.235762	0.171191	0.6213	0.2805	0.0756562	0.129098
ASB13	2.66858	3.55818	3.95451	3.1817	3.86466	3.2173	2.98127	3.51995	3.4157	3.67669	3.84884	2.85558	2.83832	3.91599	2.42581	3.19243	3.58048	2.12065	2.83033	2.97104	3.43553	3.00972	2.29343	2.39282	3.15561	2.74651	3.42185	3.65149	3.25869	2.77956	3.56995	4.3636	3.04427	3.4067	3.32429	3.88847	2.36213	2.26133	2.4065	2.94737	4.00253	3.03468	2.38816	3.53823	2.9602	2.49923	2.50494	3.58433	2.77239
ASB14	0.240914	0.171522	0.303555	0.413566	0.473258	0.465842	0.469639	0.308034	0.342331	0.206101	0.42566	0.964077	0.460262	0.477708	0.551933	0.177308	0.822554	0.422486	0.58512	0.380674	0.477521	0.386832	0.242453	0.565448	0.357659	0.187651	0.55871	0.548169	0.274643	0.452179	0.596317	0.0588095	0.523799	0.511486	0.188114	0.151543	0.352356	0.420644	0.585705	0.381907	0.748509	0.521722	0.62652	1.16542	0.470121	0.821044	0.357538	0.563421	0.189944
ASB15	0	0.0050184	0.00392105	0.150501	0.00378113	0.00778398	0.285068	0.00234316	0.0176647	0.0156393	0	0.0173035	0	0	0.0173616	0	0.41454	0.0234561	0.183175	0.196327	0.00527152	0.0601392	0	0	0.016918	0	0.0242275	0	0	0	0.00598963	0	0.309439	0.00711682	0.016044	0	0.0238369	0.123931	0.144764	0.0923054	0.0379532	0.0132624	0.006778	0.705377	0.00399614	0.183243	0.00389004	0.00512121	0.0298786
ASB16	0.24871	1.30087	0.415165	0.520409	1.15622	0.64179	0.576533	0.678997	0.467534	0.232507	0.104441	0.425664	1.09046	0.530849	1.04232	0.250394	0.912663	0.182038	2.19709	0.73774	0.619747	1.56352	0.413093	0.979869	0.46131	0.164521	0.135936	0.993843	0.300113	0.474949	0.856077	0.550225	0.326272	0.598297	0.329874	0.329797	0.348655	0.484928	1.94993	0.137608	1.14985	0.632829	1.97688	1.57721	1.25318	1.41108	0.752962	0.482119	0.126403
ASB17	0	0	0	0.0939763	0	0	0.111351	0	0.0155824	0	0	0	0.0165663	0	0	0	0.229712	0	0.150447	0.0213972	0	0	0	0	0	0	0	0	0	0	0	0	0.193806	0	0	0	0	0	0.0747325	0.0160688	0	0.0575587	0	0.427098	0	0.273717	0	0	0.012046
ASB18	0	0	0	0.0619303	0.013529	0.00931027	0.0615327	0.00210325	0.0158646	0	0	0.00312142	0.00338906	0	0.00521616	0.00430784	0.203064	0	0.076366	0.0685813	0.00944904	0.027299	0	0.00399053	0.00305154	0	0	0.00395938	0	0	0.00269103	0.014205	0.0953409	0.0253888	0	0.00474235	0.010746	0.0569363	0.0536588	0.00328683	0.0870618	0.00894101	0	0.42379	0.00358718	0.0851229	0.0413554	0.0137482	0.00491828
ASB2	1.37064	1.23223	0.464026	1.84045	0.0749851	0.630556	0.567277	1.82875	1.3013	0.415888	1.99628	0.269726	0.435732	2.02212	4.81764	0.642672	1.3889	0.498315	4.47158	0.332586	0.11304	0.488757	1.29195	5.07932	0.185266	2.25068	0.275472	3.67442	0.470795	0.717746	0.855602	2.16064	0.189481	1.04123	0.98727	1.53601	1.33267	1.68866	4.83468	0.538689	0.862359	0.899146	5.0931	0.73632	0.655005	4.81518	0.410703	1.32444	2.18898
ASB4	0.0195831	0.107727	0	0.0504618	0.212241	0.0353964	0.0321061	0.0123698	3.19048	0	0.0259904	0.0435988	0.637154	0.04272	0.00922334	0.0840796	0.0983332	0.225677	0.04292	0.45414	0.0222097	0.158297	0.0229784	0.0233951	0.00719407	0	0	0.00933036	0	0.056232	3.99363	0.0125834	0.0382705	0.190886	0.00426705	0.11837	0.110269	0.103896	0.298717	0.374255	0.28053	3.24837	0.0355493	0.136697	0	0.128649	0.0326443	0.888685	0.0115848
ASB5	0.0796768	0.713741	0.0600135	1.00075	0	0.00312004	0.0617254	0.538773	0.472489	0.0249533	0	0.0412032	0	0.0950597	1.62222	0.0621217	0.242888	0	3.98368	0.0631862	0	0	0.471534	4.07434	0	0	0.00488035	2.56433	0.134725	0.0479268	0.0250022	1.77904	0.0912229	0.00853982	0	0.323121	1.05661	0.201627	2.46707	0.0087762	0.00460953	0.011947	2.59256	0.466383	0	2.29583	0.00466889	0.00614604	1.33665
ASB6	2.64626	3.023	2.36414	2.94662	4.14627	2.93066	2.83466	3.35492	2.60459	3.04746	2.43688	2.7694	2.70634	3.01776	2.49111	3.32196	3.04455	1.64934	2.14233	3.06003	2.63074	2.50412	2.48306	1.96443	3.11606	2.01098	2.3705	2.30358	2.00215	2.21513	2.8894	3.11781	2.29132	3.12443	2.58692	2.91836	2.86823	2.63801	2.43875	2.87133	2.67484	2.7785	2.49963	2.58773	2.38707	2.46406	2.68087	3.15591	2.87455
ASB7	2.2196	1.86635	2.43469	2.47187	3.06133	2.33895	2.4018	2.39868	2.26904	1.88102	1.49301	1.85255	2.50792	1.98149	2.07023	1.42909	2.00333	1.92483	2.00177	2.60659	2.10523	2.89051	1.56508	2.07326	2.11834	1.46651	2.01853	1.96791	1.66337	2.00964	1.5469	2.06668	2.26432	2.18006	2.18698	1.81982	2.58922	2.34253	1.81965	2.21452	2.30098	2.28382	2.05027	1.98842	2.4597	2.0939	2.15425	2.36734	2.29798
ASB8	2.7904	2.64282	2.87105	2.80317	2.51237	2.94517	2.92664	2.81929	2.80501	2.65237	3.01924	2.39607	2.81439	3.10283	3.23777	2.89753	2.78853	2.98321	3.25335	2.93841	2.90486	3.47501	2.35995	3.30915	2.4191	2.93467	3.09779	3.00787	3.32889	2.7048	2.47876	2.67863	2.45491	3.07798	2.67809	1.84149	2.85233	3.38438	3.17961	3.01339	2.85541	3.1289	3.40703	2.84851	2.48355	3.02756	2.4173	2.93427	2.88127
ASB9	1.61336	0.852644	0.472731	1.26683	0.406116	0.784378	2.03383	1.57376	1.90971	0.850123	1.29423	0.110661	0.381819	0.424012	0.685514	0.4265	0.911777	3.12514	0.613179	1.16284	0.647885	2.18091	1.24418	0.473724	0.977706	0.735498	0.897247	0.522285	1.15594	0.5696	0.836722	1.05743	0.824439	0.869521	0.693904	1.19387	0.981571	1.17426	0.577157	0.389099	0.997253	1.82604	0.503962	0.992716	0.594273	0.339883	0.881116	0.577188	0.768165
ASXL1	2.84484	3.43522	3.30649	3.57172	4.46443	3.93727	3.83297	3.46396	4.21435	3.3238	2.93418	2.31696	4.15094	3.02204	3.29177	3.44363	3.58211	2.86957	3.26511	3.1294	2.6961	4.39651	2.36639	3.05241	3.38361	2.10129	2.21462	3.2942	2.69794	2.96801	3.0347	3.72956	3.12833	3.35181	3.06893	2.72248	3.40785	5.03973	3.22301	2.79187	4.31552	3.53602	3.15357	3.50278	2.73429	3.26939	3.75	3.33508	3.13238
ASXL2	2.3649	2.44046	2.83554	3.13139	2.92584	2.71643	2.64508	2.90997	3.25238	2.1064	2.00703	1.53536	3.31516	3.05142	2.40761	2.42025	2.59623	1.84458	2.43418	2.80395	2.49347	3.15189	2.08123	2.64657	3.58881	1.9231	2.18413	2.81763	1.9414	2.47527	2.69864	2.74076	3.05882	2.16806	2.42571	1.57087	2.92666	3.21378	2.43041	2.91888	2.84573	2.63434	2.4796	2.08373	2.29401	2.53478	2.82712	2.59993	2.97294
ATG7	1.95637	2.01885	1.87394	1.86605	2.1031	1.67734	1.81381	1.50801	1.55751	1.68324	2.02692	1.29215	1.68395	2.01284	1.56258	1.65008	1.90247	1.71539	1.41083	1.7426	1.18385	1.29437	1.5277	1.1794	2.19481	1.37626	1.62062	2.07501	1.83202	1.33516	2.08099	2.14875	1.44456	1.82165	2.16969	1.47251	1.84661	1.64395	1.44576	1.78106	1.84454	2.18316	1.22707	1.5587	2.05737	1.56558	2.36555	1.70176	2.45212
ATXN3	0.597657	0.579492	0.88079	1.18253	1.01771	0.741852	0.825525	0.925904	1.22608	0.572515	0.764714	1.13879	0.782315	1.04236	1.39193	0.631099	1.19916	0.828288	1.36409	1.14249	0.982977	0.925195	0.78538	1.1936	0.589632	0.566335	0.83962	1.23185	0.753552	1.03318	0.921103	0.743892	1.0239	1.06906	0.853787	0.600843	0.873408	0.88896	1.31223	0.640013	1.50707	0.819914	1.41779	1.481	1.00797	1.30397	1.09712	0.879514	0.885297
ATXN3L	0	0	0	0	0	0	0	0	0	0	0	0	0	0	0	0	0.0473768	0.0167023	0	0	0	0	0	0	0	0	0	0	0	0	0	0	0	0	0	0	0.0113382	0	0	0	0.0108866	0	0	0.0212074	0	0.027497	0	0	0
ATXN7	1.84546	1.72179	2.35212	2.54437	2.43896	2.29883	2.38783	2.10419	2.93651	1.92246	1.79824	1.56068	2.37459	2.63391	2.20434	1.89001	2.524	2.22301	2.18873	2.53127	2.07283	2.03522	2.07595	2.58899	2.66955	1.79368	2.19089	2.45438	1.96208	2.10188	2.24861	2.43798	2.45999	1.77127	2.28425	1.18168	2.52358	2.37775	2.30822	2.34437	3.27766	2.7948	2.25591	1.87125	2.27345	2.27068	2.52457	2.9249	2.72074
AUP1	6.09832	5.39339	5.81627	5.28609	5.28482	5.85348	5.36192	4.83236	5.95062	6.31352	5.65546	5.75897	5.20188	5.79761	4.41979	6.57966	5.72565	5.60604	4.17778	6.40892	5.24697	5.30273	4.80166	3.72794	5.42974	5.67892	5.97202	5.44551	4.77087	5.16384	6.1078	5.39353	5.63058	5.8419	5.82398	7.10151	6.35909	5.78911	4.11364	5.71532	4.81465	5.21231	3.92733	6.07887	5.65566	4.91531	4.93699	5.20911	5.50518
AXIN1	2.87868	3.3293	2.93694	3.04942	3.51781	2.84403	3.21306	2.69802	3.22907	3.38985	2.99836	2.18167	2.65935	3.30707	2.14237	3.82594	3.9533	2.01207	1.97449	3.76664	3.23949	3.61915	2.30597	1.63019	2.59111	1.85377	2.78555	2.63317	2.54133	2.09622	3.72262	3.38008	2.87386	2.83866	3.12632	3.01324	3.37045	2.14049	1.91644	3.83322	3.689	3.25511	2.13002	2.48059	3.0595	2.21842	2.87567	2.84592	2.67756
AXIN2	2.64861	2.04371	4.38438	1.58581	7.50607	1.58178	5.54093	2.36556	1.91264	0.40297	1.49471	1.98565	1.33996	2.02964	2.35081	4.54744	1.85511	0.257148	2.0907	6.0467	2.13878	1.14725	1.25912	2.04778	1.02359	2.07188	1.47029	1.90249	1.44794	1.37006	1.97971	2.01761	1.49252	1.81779	0.804456	1.52448	2.25843	1.51012	2.00957	0.527358	2.03679	1.37337	2.22512	3.80987	3.02631	2.71027	1.77395	1.53556	1.04162
BABAM1	3.79608	3.77991	3.72065	3.90512	3.35384	3.34478	3.75232	3.22364	3.28979	3.74365	3.57986	3.6327	3.39758	3.56651	3.22779	4.18617	3.47623	3.10821	3.75148	3.91325	4.07199	4.49498	3.33169	2.94263	3.08543	3.41193	3.62045	3.39561	4.44008	3.56433	2.91387	3.73244	3.29251	4.0393	3.64932	3.47148	3.18442	3.16864	3.42434	3.30511	3.45581	3.36256	3.28237	3.94534	3.95938	3.2958	3.08811	3.60889	3.37346
BAG6	5.50078	6.61658	5.87197	6.08942	6.24383	5.61639	5.83837	5.19183	5.99551	5.2534	5.57352	5.26353	6.12455	5.37666	4.94815	5.94027	5.50002	5.08148	4.95029	5.43864	5.85508	5.97138	5.35639	4.66741	7.08135	4.81455	5.33152	5.2087	5.51926	5.41644	4.92364	5.90384	5.18636	5.53561	5.85758	5.55106	5.39752	5.62955	4.91886	5.56513	5.79603	5.6592	4.9794	4.67659	5.51574	4.94094	5.36474	5.58168	5.48449
BAP1	3.5167	4.09704	3.59641	3.93022	4.77628	3.63275	3.71355	3.47051	3.49851	4.04218	3.90426	3.17898	3.80916	3.98564	3.58798	4.12134	3.55688	3.15996	3.53449	4.21958	3.73936	3.84292	3.44598	2.97394	3.8512	3.19145	3.27614	3.51654	2.12643	3.06495	3.68118	3.65819	3.67296	3.66307	3.74261	3.3835	3.70765	3.36987	3.51684	3.84055	3.88658	4.25577	3.36292	3.16225	4.1061	3.27301	3.75388	3.78934	3.78157
BARD1	1.64136	2.04127	2.0823	2.35104	2.08247	1.63156	2.27596	1.74486	2.42361	1.75753	1.11957	1.34313	2.15709	2.3025	1.2456	1.722	2.08429	1.7525	1.45217	2.79451	2.39498	2.97245	1.51673	1.86123	1.86729	0.882516	1.8844	1.4139	2.38623	1.86981	1.72983	2.22833	2.08452	1.57072	2.24934	1.6407	1.7581	2.37975	1.09095	1.7167	1.92829	1.9323	1.11783	1.95105	1.82947	1.63068	1.49769	1.88066	2.26631
BCAP31	6.3152	6.78022	5.76895	5.4091	6.67591	5.93399	6.69555	5.37787	6.08702	6.22396	5.9571	6.88298	6.76991	5.5087	4.8535	6.29975	5.91673	6.18568	4.52807	6.66603	6.23039	6.1962	5.23131	4.26831	6.76981	5.22663	7.01902	6.09671	6.76262	5.02364	5.918	6.76847	5.40373	6.79483	5.91774	6.12269	6.32724	5.68701	4.44609	5.48046	5.49448	6.56086	4.5394	6.17568	6.12292	5.35496	5.29885	5.62895	5.47451
BCL10	3.57404	2.35759	4.10583	4.08669	2.66997	3.34668	3.04574	3.37567	3.27409	3.31438	3.22754	3.20211	3.88936	3.97606	2.54606	2.60005	3.46884	3.31991	2.26252	4.47246	3.49442	2.7049	4.76938	1.97146	3.63606	2.95171	4.58695	3.38016	3.52813	3.71607	3.87446	4.04215	4.25065	3.02394	4.42085	2.61741	3.32415	3.46845	2.31383	5.35578	2.79156	3.63836	2.12905	3.34024	3.54971	2.85501	3.31995	3.79575	3.31267
BECN1	3.25938	3.00578	3.54396	3.20912	3.45251	3.42191	3.61522	3.56952	2.83896	3.83193	3.05124	2.4549	2.88488	2.89199	2.89212	2.42408	3.08763	3.05372	3.11502	3.09127	3.45459	2.83509	2.825	3.01479	2.91065	2.68047	3.10008	3.08547	2.7195	2.70053	3.06668	2.8386	3.08082	2.94936	2.87318	2.24467	3.52428	3.55418	2.97013	2.68004	3.56683	3.26757	3.01631	2.57798	3.14103	2.75349	2.85713	2.77117	3.20832
BIRC2	3.64578	2.97613	3.81129	4.14385	4.05124	3.79265	3.20713	3.58266	4.09914	3.17283	3.70472	3.83785	4.48217	4.11225	3.41005	2.91985	4.0065	3.30137	3.0253	3.16234	3.34855	4.32013	3.08194	2.95191	3.85559	3.13688	3.94486	3.3589	3.63277	3.88577	3.93598	4.87022	4.23099	4.16107	3.84494	2.66257	4.14233	4.1383	3.05508	3.46972	3.39175	4.33387	3.00936	3.59326	3.88946	3.32556	3.79913	4.21922	4.03484
BIRC3	4.54989	1.49591	3.40784	3.44191	2.73909	4.06712	3.45341	2.95915	2.71821	3.30821	3.93019	4.29629	5.17907	4.80529	2.81975	3.77964	4.79649	3.75679	2.8011	1.28623	1.3323	1.20924	2.01215	3.33866	3.19081	4.4541	4.09909	3.44018	3.13875	3.28576	3.94171	3.50473	2.31139	4.01929	4.19176	1.77951	4.1317	2.57445	2.53577	2.39096	2.21244	4.20554	3.18737	3.71308	5.07138	4.07443	2.94759	6.75564	4.56309
BIRC6	2.72632	2.42168	3.18466	3.39677	3.15205	3.16805	3.0458	3.13362	3.49129	2.56433	2.39842	1.89626	3.94215	3.18161	2.75283	2.25642	2.97944	2.73448	2.839	2.54067	3.02035	3.45104	2.24737	3.07574	3.12734	2.11473	2.71956	3.43755	2.48918	2.78812	2.94336	3.25759	3.04426	2.37639	3.04413	1.63676	3.08943	3.45978	2.74205	3.76095	3.63337	3.37901	2.81557	2.81671	2.98196	2.94274	3.62801	3.08726	2.95986
BLMH	2.73969	3.11215	2.62757	3.25742	3.19596	2.24052	3.35736	3.53497	3.12375	3.10015	2.33956	2.61055	2.39002	2.2438	2.61517	1.81065	1.86187	2.96725	2.21449	2.62035	1.27162	2.46679	2.76412	2.09576	2.01427	1.81635	2.67416	2.69685	1.9537	2.86633	2.28627	3.03462	2.88588	2.48969	2.69968	2.42324	2.33572	3.14322	2.32952	1.68273	3.28488	2.62163	2.35317	3.69176	2.60873	2.66498	2.7395	2.65677	3.01829
BRCA1	1.83561	2.00334	2.19578	2.54396	3.20049	2.43916	2.58261	2.3911	2.40546	1.74943	1.28738	1.60784	1.9594	2.44272	0.983718	1.14866	2.02637	1.86642	1.02907	2.78281	2.05212	2.88869	0.879671	0.999283	2.11546	1.0575	2.11205	1.43874	1.91209	1.73508	2.13912	2.06954	1.96763	1.20377	2.37713	1.24645	2.63527	2.45049	1.01413	1.87608	2.41394	2.28961	0.942195	2.80254	0.324409	1.21957	1.49488	1.83528	2.12456
BRCC3	3.74781	3.71227	4.29118	3.65753	3.90177	3.86613	4.37211	3.8125	3.87354	3.99966	3.09599	3.96117	3.83947	3.84798	2.84121	2.50449	3.07001	3.66813	2.97973	5.92366	4.40413	4.35992	3.05337	2.84586	3.85939	2.55624	4.21563	3.98641	4.006	2.97178	4.32836	3.64519	4.12154	3.6555	4.18811	2.45052	3.60644	3.99169	2.77207	3.72884	3.58776	3.524	3.00722	3.81236	3.67544	3.50487	2.80796	3.19058	3.88753
BTBD1	3.68879	3.9139	4.64437	4.50534	4.75561	3.96368	3.81359	4.66713	4.07474	4.06562	3.66748	3.83014	3.49129	4.73098	3.75606	4.07438	3.89329	3.99403	3.69527	4.51808	4.87706	4.62715	3.73175	3.64296	4.42791	2.92215	4.70694	4.01672	3.60664	3.72901	3.87831	4.19236	4.38007	3.56944	4.1483	3.75966	4.35642	4.79676	3.62109	3.94349	4.12202	4.13449	3.69008	3.89421	5.11948	3.68966	3.90061	3.57786	4.57762
BTBD6	4.39745	3.99843	4.29335	4.17801	3.86859	3.48968	4.09678	3.78811	3.76866	4.89782	4.09727	4.36081	4.47268	4.44532	3.61742	4.65616	4.09487	4.13063	3.85814	3.68473	4.04119	4.25054	4.11305	3.34734	3.77191	3.85185	4.29668	3.5351	3.32886	3.99114	4.45765	5.12696	4.16136	4.1797	4.5985	4.69915	4.01143	3.67007	3.81405	4.17793	4.4816	4.17035	3.72759	3.31472	4.97289	3.79708	3.47895	3.94262	4.35745
BTRC	1.74307	1.7374	2.29084	2.35149	3.05402	1.75883	1.99507	2.25594	1.97533	1.43265	1.53703	1.63683	1.76438	2.40049	2.21132	1.63765	2.09154	0.998345	2.1284	2.62294	2.07053	3.18804	2.15439	2.14919	2.64253	1.37218	1.67481	2.20123	2.32489	2.17696	1.66523	2.30592	2.30112	1.61677	2.0807	1.13862	2.32276	2.53262	2.16702	1.60224	2.12337	2.57333	2.3126	1.9445	1.32431	2.19761	2.04387	1.88023	2.34407
CAV1	2.80364	3.67563	3.46065	4.51014	1.82915	3.64626	2.44529	4.20134	4.10634	3.04549	4.4887	2.55874	3.1516	3.94098	6.97723	2.90367	3.53513	3.40998	7.2338	2.26452	2.95929	2.22243	4.8351	7.67963	2.83849	3.48767	3.042	5.53536	2.15631	4.80816	2.52327	4.36761	5.68084	4.33741	2.78336	4.08483	4.43824	3.36092	6.92591	4.35821	3.25716	2.71927	7.4808	3.16257	2.66772	6.20214	5.1328	3.64403	5.17859
CBL	2.17237	2.4545	2.12926	2.7502	3.24282	2.57081	2.65578	2.74443	2.76897	1.86851	1.99901	1.39494	3.17097	2.70413	2.37489	1.39692	2.74407	1.78373	2.5243	2.50703	2.23355	2.86788	1.88891	2.58679	2.80063	1.57978	1.67069	2.54293	1.45755	2.14418	2.16087	2.8009	2.86291	2.30222	2.20912	1.51487	2.63535	3.2958	2.49256	2.34029	2.82887	2.59885	2.69265	1.48697	1.51676	2.35801	2.87627	2.08303	3.09771
CBLB	1.75909	1.85333	2.28699	2.32552	2.02662	2.2789	1.73093	2.40205	3.05825	1.91444	1.66071	1.58152	3.05957	2.50354	2.09376	1.63321	2.5856	1.89676	2.09205	2.19552	1.92646	1.86239	1.50377	1.93093	2.13992	1.85907	1.92406	2.21927	2.14227	1.88356	2.78032	2.21906	2.30238	2.70135	2.30855	1.51874	2.75038	2.54781	1.94421	2.63867	2.0559	2.53767	1.47784	1.8178	1.64958	1.94659	2.9188	2.44402	2.02164
CBLC	6.46304	4.94601	4.91676	5.27121	4.33353	5.1779	4.85871	4.43348	5.04999	5.443	5.08136	5.46464	5.6917	5.01077	2.02638	4.82391	5.30438	7.22095	0.325605	5.16566	4.60091	4.84088	5.14436	1.33124	7.26029	4.52577	5.77409	5.23105	6.15069	5.31376	7.38063	5.60683	4.12352	6.02562	5.48145	5.08009	4.34796	4.12939	1.4942	4.9181	4.92074	4.98338	0.232186	6.01574	4.8913	3.57559	3.75908	5.09199	3.68507
CCDC47	4.1848	4.05438	5.28758	4.73298	5.24968	4.67258	5.09445	3.85379	4.82215	5.43996	4.29097	4.82937	5.04292	5.14977	3.88123	4.61602	4.87554	5.09315	3.66724	4.71607	5.58988	4.42367	4.05408	3.8577	4.19653	4.32542	5.29776	4.5177	3.77786	4.36219	5.32585	4.19704	5.45921	4.87477	4.67411	5.12756	5.5493	4.25474	3.71325	5.07658	4.86923	4.74398	3.82109	4.34465	4.93596	3.59321	4.12046	4.39233	5.07974
CCNA1	0	0.0698211	0.0237495	0.403677	0.00767635	0.0365558	0.0351646	0.145016	0.0143808	0	0.0494634	0.0140863	0.00766485	0.0743145	0.224267	0	0.232841	0	0.317588	0	0	0.111503	0.244683	0.154359	0.0137722	0.177528	0	0.128782	0.309661	0.204801	0.0538887	0.0555017	0.0315444	0.0287195	0.0243912	0.0107192	0.77503	0.108559	0.190306	0.00743398	0.0385695	0.0134797	0.568964	0.326837	0	0.186073	0.0543932	0.030954	0.732333
CCNA2	4.77959	4.38035	4.54373	4.58864	3.80838	4.06998	4.43458	3.05484	3.98861	5.07722	3.47895	4.44014	4.09108	4.24609	1.87877	3.84367	3.41727	4.33936	0.489338	5.25936	5.63843	4.45004	2.51682	1.07993	3.7262	2.83052	5.00053	2.97862	3.79929	3.72782	3.99465	4.08941	4.68973	3.63825	4.74068	4.40259	4.29648	4.34025	0.39563	4.02769	3.97374	4.71163	0.688644	3.54341	3.48862	2.33633	3.04448	4.23001	4.64101
CCNF	2.86745	3.9921	2.52258	3.26482	2.28579	2.42996	3.61545	1.53325	2.75787	3.50256	2.19091	2.51264	2.8894	2.69081	1.01027	2.48988	2.38788	2.42154	0.510241	3.00521	3.36807	4.30184	1.15544	0.336311	2.49603	1.39483	2.57036	1.65213	1.89191	1.84951	3.31129	2.81216	2.69099	1.80702	2.92408	2.16289	2.4179	1.81438	0.493779	3.02672	3.12502	3.10537	0.360714	2.09915	2.5736	1.22366	1.898	2.78117	2.29282
CCP110	1.21392	2.01405	1.50098	2.19744	2.149	1.68901	1.45108	1.57831	1.62857	1.20732	0.952156	1.27558	1.76613	1.8123	1.77603	1.08542	1.69767	0.991061	1.80333	1.65589	1.83565	2.81694	1.15596	1.74996	1.03787	1.00031	1.3323	1.54272	1.20356	1.57563	1.49839	1.58978	1.74588	1.60857	1.50104	0.81897	2.50261	1.68118	1.69469	1.99914	1.77174	1.88626	1.90263	1.63617	1.49232	1.64489	1.84867	1.77859	1.84028
CDC16	4.36316	4.00595	4.96454	4.06609	5.68154	4.05064	4.18698	3.63333	4.4583	3.73044	3.89725	4.29399	3.9192	4.0985	3.67417	2.99412	3.59971	3.78044	3.81671	4.20838	4.2011	2.96825	3.19294	3.81921	3.55446	3.30183	4.32898	3.74047	4.12311	3.99387	4.05353	3.84372	4.3297	4.22674	3.93689	4.06658	3.71139	4.64918	3.86836	3.175	4.79864	3.85536	3.68868	4.5913	3.24097	4.048	3.67567	3.89453	3.78094
CDC20	5.75244	5.31435	4.59586	5.08991	4.3726	5.04907	5.26995	3.93188	3.97751	5.81395	4.70752	4.66003	5.83466	5.02907	2.05632	5.34408	4.0965	6.08777	0.184551	5.5574	5.88193	4.53925	3.19	0.852241	4.62765	4.28572	5.71469	3.16007	4.81967	4.0299	5.94184	4.7971	4.94396	4.81215	5.63026	5.84958	3.90873	5.21065	0.436974	5.35993	4.79747	4.95687	0.246128	4.78458	5.23044	2.9681	3.14731	4.45678	5.08168
CDC23	3.27652	2.73439	3.25092	3.78773	3.49617	3.14594	3.44022	2.73262	3.0665	3.21226	2.43669	2.95729	3.32596	3.59529	2.6886	2.31549	2.8949	2.89909	2.81736	3.56847	3.46265	2.91706	2.38697	2.54964	3.05794	2.19153	2.99925	2.69169	3.19853	2.43016	2.65758	3.33664	3.4211	2.74194	3.29614	2.40128	3.46946	3.93992	2.56545	2.9264	3.28668	3.20139	2.74347	2.94395	2.62788	2.71189	2.71865	2.94815	3.32921
CDC25A	2.27104	2.18105	2.11387	2.84735	2.29552	2.38427	3.14564	1.3585	1.86147	2.66716	1.79936	2.08025	1.22553	1.98894	0.521264	2.38649	1.7314	2.61662	0.325756	3.2914	3.0259	2.88105	0.91756	0.219806	1.92758	0.913255	2.56894	0.826117	1.83716	1.21575	1.98395	1.82686	1.85609	0.943378	2.66166	1.57648	1.04463	1.805	0.219584	2.83057	1.53219	2.62876	0.264127	2.54032	1.85724	0.708387	1.10347	1.85481	1.79532
CDC26	3.30092	2.46319	2.76257	2.42979	3.0777	2.45164	2.4786	2.66115	2.4917	2.52786	2.5427	2.1561	2.35107	2.50889	2.32095	2.51892	2.65562	2.66515	2.53062	3.11403	2.34302	2.3585	2.19245	2.21788	1.5508	2.32536	2.55472	2.49912	2.63021	2.67224	2.3167	2.51187	2.69229	2.43144	2.16061	2.84793	2.54371	2.75131	2.44171	2.60552	1.96346	2.41762	2.1059	2.01832	2.23532	2.50275	2.23258	2.82147	2.47864
CDC27	3.08919	2.97384	3.58495	3.55198	3.49454	2.90954	4.01222	3.70322	3.45723	2.81598	2.47518	2.92265	2.83431	3.46919	3.30847	2.07014	3.39658	3.23355	3.08728	3.86026	3.62043	3.15165	2.75841	3.33904	3.72965	2.20123	3.51286	3.12564	2.89035	2.98917	2.96563	3.27915	4.03073	3.13398	3.53805	2.50568	3.603	4.6909	3.00562	3.0535	3.36945	3.38936	3.0843	3.31629	3.16517	3.09886	3.4102	3.18432	3.82356
CDC34	5.04987	3.88157	4.47438	4.68877	4.77011	4.54223	4.79969	4.73818	3.96976	4.78363	4.6349	4.92163	3.63652	4.26226	4.10862	4.413	4.38768	3.98276	4.02352	5.2038	4.92684	4.97205	4.14223	3.75334	4.93985	4.10342	4.63113	4.12859	4.92772	4.17326	3.50165	5.2952	3.68714	4.62459	4.63718	4.65512	3.13831	4.1838	4.16805	3.59893	4.22719	4.1779	4.33882	4.71098	4.64042	4.16546	3.75515	4.00747	3.88038
CDC73	3.20101	3.03138	3.44748	3.32741	3.66417	3.24682	3.42634	3.22314	4.10088	3.17446	2.63697	2.56644	3.81984	3.63748	3.28464	3.00894	3.30119	3.18215	3.39584	3.74741	3.65494	3.78832	2.84434	3.31703	3.69524	2.36991	3.87562	3.08135	3.55357	3.11018	3.42256	3.34456	4.26552	3.83169	3.5392	2.85339	3.35565	3.85955	3.36964	3.59101	3.31819	3.28095	3.4465	2.96668	3.35466	3.12068	3.16827	3.31007	3.82776
CDK1	3.81612	4.54247	3.83372	3.33167	3.92829	4.40325	4.51106	3.12714	4.14146	3.86029	2.62887	4.0323	3.10935	3.59857	1.39252	2.35813	3.41583	4.67241	0.277682	4.52213	5.10046	4.65474	1.89806	0.689612	4.21045	2.14608	4.65555	2.41582	4.33099	2.70433	4.20962	4.18556	4.27664	3.94277	4.058	3.96449	3.48198	3.64969	0.348501	5.08872	3.59416	4.55796	0.296252	4.31186	3.83785	2.08264	2.51477	3.76188	3.85244
CFTR	2.32194	1.80865	2.16995	1.84238	2.64205	2.99495	3.32123	1.93411	3.2393	0.232445	2.86113	0.03546	4.86029	2.20354	0.684238	3.04189	2.69112	3.86964	0.169274	4.8249	0.885331	2.21257	0.872765	2.30313	1.32821	0.70246	3.80148	3.57943	2.71441	1.44889	0.867587	4.98931	1.6425	0.46129	3.45902	1.37692	0.246226	1.67078	0.500408	2.56181	0.158406	0.912402	0.0831781	3.26584	2.19382	1.72092	0.236182	3.08515	0.790904
CLSPN	1.60556	1.9365	1.43066	3.00062	2.23873	1.64246	2.72914	1.14542	1.85661	1.76049	1.21102	2.40175	2.78902	1.9287	0.810024	1.4219	2.16745	2.11409	0.26974	2.91372	2.37993	2.58311	0.40173	0.38218	1.97733	1.07847	2.16236	0.861738	1.33617	1.59104	2.29759	1.88901	1.97633	1.57089	2.89839	1.35686	2.54461	1.55637	0.204486	2.17765	2.52341	2.46836	0.0746117	2.48671	2.16959	0.798103	1.81847	1.59611	1.55921
CTR9	3.19208	3.22083	3.70798	4.18018	3.33464	3.85655	3.83556	3.08214	3.86824	3.37297	3.20263	4.02143	3.85795	3.60776	3.18889	2.9846	3.62725	3.23111	2.66326	3.28791	3.83409	4.13203	2.78907	2.73212	3.1378	3.18651	3.78949	3.17617	2.77362	3.42833	3.31182	3.59658	3.63543	3.21733	3.56765	3.02572	3.43441	3.80096	2.67909	3.46732	3.40167	3.81114	2.72956	3.09548	2.30784	2.92703	3.06493	3.52589	3.51789
CUL1	4.18539	3.41221	4.58258	4.37933	4.67529	3.82077	4.88909	4.31171	4.50343	4.5724	3.68834	4.03923	4.85305	4.08079	4.39159	4.39415	4.353	4.19731	4.48885	4.71446	4.48276	4.40476	3.70765	4.57249	3.98597	3.19161	4.47802	4.32362	3.79895	3.90995	3.46285	4.41838	5.11518	3.99122	4.55895	3.55088	4.2049	4.23552	4.33188	4.87639	3.93611	4.95153	4.41728	3.77898	4.41483	4.22728	4.29098	3.91162	4.80656
CUL2	3.06225	2.82799	3.36282	3.10143	3.46827	3.2903	3.16236	3.01933	3.11217	2.87312	2.23269	2.86608	3.47342	3.20042	2.80426	2.08529	3.53216	2.87949	3.0237	3.27598	3.22157	2.95097	2.23999	3.21349	3.11611	2.18313	3.03089	2.82804	3.1851	2.98002	3.0431	3.62847	3.25994	3.47609	3.35816	2.69686	2.49846	3.20247	2.86461	3.05838	3.21222	3.53188	3.01633	3.5405	2.5725	2.86224	2.79183	3.18537	3.47535
CUL3	2.39341	2.30655	3.23016	2.86741	3.43967	2.48799	2.81216	2.74254	3.19181	2.41105	2.12304	2.30721	2.61786	3.05622	2.48241	2.21756	2.95684	2.52951	2.53	3.5244	3.10883	3.10384	2.57049	2.60574	2.54131	1.93995	2.9703	2.61046	2.39662	2.8481	2.5608	2.96737	3.18572	2.96696	2.82225	2.19279	3.30908	3.26135	2.4304	2.56367	2.94529	2.78334	2.59969	2.09227	2.53059	2.48924	2.60444	2.61952	3.00164
CUL4A	3.69977	3.66224	4.45146	3.65916	5.20942	4.01151	4.16915	3.47007	4.26917	3.58708	3.16564	3.60503	3.38802	3.78302	3.0924	2.7622	3.4094	3.2911	3.32563	4.1373	4.21804	2.66206	2.79451	3.30512	3.58335	2.66582	3.61173	3.24526	3.20879	3.38775	3.77952	3.25774	4.15501	3.79567	3.78311	3.21896	3.47412	4.18959	3.24113	3.51266	4.87495	3.54374	3.11731	3.80258	2.84522	3.26222	3.46591	3.84346	3.63913
CUL4B	2.47638	3.56883	3.37423	3.42592	4.09686	3.17854	3.6095	3.64784	3.94339	2.76148	2.63019	2.63179	4.29063	3.17175	3.47227	2.41863	3.06662	3.08191	3.52752	3.96672	3.73221	4.05496	3.17615	3.64557	3.86797	2.52213	3.28411	3.74966	4.13874	3.3536	3.44235	3.75431	3.613	3.88938	3.13923	2.59645	3.60817	3.22149	3.47972	3.13166	3.74404	3.47372	3.49431	3.08811	2.87128	3.69641	3.40221	3.05727	3.54169
CUL5	1.9829	1.96064	2.93826	2.89675	2.54573	2.84201	2.7338	2.88253	3.30524	2.39197	2.04034	2.56804	3.00668	2.91388	2.99611	1.61425	2.79613	2.37168	2.82098	3.00653	3.14036	3.05703	2.31872	3.04154	2.30759	2.05764	2.86371	2.62879	2.20481	2.68626	2.66368	2.82807	3.20855	2.69417	2.48666	1.85503	3.15264	3.26075	2.79503	2.55691	2.59192	3.02936	3.15842	2.45127	2.24537	2.63668	2.59761	2.83127	2.92964
CUL7	2.48246	3.44894	3.02032	4.51545	3.49757	3.42676	3.46404	3.18784	3.48204	3.01553	2.55459	1.85068	4.47802	2.55161	2.96337	4.40551	3.02917	2.44377	2.61661	2.91555	2.9589	4.11949	2.48486	2.36892	5.47124	2.09444	2.32845	3.13076	2.08615	2.88091	2.19976	2.93716	3.06985	3.17741	2.89194	2.49161	2.85102	3.65158	2.62065	2.16589	4.83928	3.44328	2.58717	2.47819	3.26214	2.33981	3.62233	3.49229	2.75963
CYLD	1.77853	1.59947	1.94434	2.03612	1.50461	1.37297	1.54086	1.9041	1.65756	1.15892	2.11479	1.01746	1.74709	2.78868	2.49368	1.16743	2.30571	1.28962	2.2747	1.5316	1.30032	1.63663	2.01099	2.84331	1.66117	1.49722	1.37551	2.07444	1.31809	1.91162	1.5029	1.84063	1.50186	1.58783	2.26057	0.994252	2.05997	1.93031	2.02549	1.33119	2.28729	2.15426	2.31695	1.21716	1.70335	2.36089	2.35832	2.25367	2.7864
DDB1	3.91098	4.76314	4.53518	4.61717	4.44859	4.34824	4.3875	4.00992	4.30132	4.46412	3.87287	3.34353	3.68257	4.56517	3.68487	3.8819	4.27167	3.81038	3.86411	4.1546	4.45081	4.45789	3.54946	3.4969	4.22103	3.39943	3.98551	3.67158	3.31207	3.78823	3.94507	3.67051	4.53093	3.74939	4.31738	3.27075	4.11636	4.73784	3.70684	4.10688	4.2604	4.60698	3.67224	2.86194	4.01358	3.53499	4.01049	3.84799	4.18704
DDB2	3.31889	1.99357	2.61148	2.05085	2.1861	2.27969	3.65601	1.69949	1.87032	2.92715	2.96019	2.27349	2.25554	2.23842	2.17189	2.59275	2.66926	2.71745	2.52871	2.64206	2.222	3.31535	2.6439	1.86319	3.90003	1.69464	2.47468	2.75305	2.17828	2.86379	2.49738	2.71925	2.26926	2.52964	2.71548	2.09957	2.14832	2.29758	2.31037	1.72864	2.31415	3.46628	2.2904	2.15639	3.51332	2.79294	2.18871	2.89346	2.56385
DDX58	2.33713	3.12262	2.51961	3.52135	2.92834	2.0401	1.58484	3.51388	4.69035	1.40778	2.34122	1.40006	2.33884	3.00667	2.59105	1.72428	3.40474	2.86549	2.54588	1.67641	2.06767	2.0832	1.736	2.83306	3.13062	1.86813	2.8645	2.94406	1.85182	2.8484	2.48425	3.25	2.50592	3.13637	2.72444	2.92509	2.24513	3.29077	2.53009	1.74288	2.69721	2.6962	2.36125	3.21725	3.04167	3.32326	2.48072	4.47638	4.38207
DERL1	3.49116	3.70043	3.80262	3.42967	4.26397	4.51068	3.70375	3.30621	3.95483	4.36341	3.61838	3.70378	3.59632	4.09801	3.25453	3.57568	3.80547	3.52825	2.70829	3.51887	4.13328	3.67604	2.70791	2.72452	3.02201	3.25211	4.19092	3.30605	3.39751	3.36985	3.5024	4.16551	4.03733	3.52161	3.90695	3.48466	5.68709	3.77156	2.57177	4.34212	3.47343	3.83337	2.64011	4.0265	3.54357	3.44205	3.63901	3.49678	4.14179
DERL2	3.00184	2.55448	2.74716	2.81158	2.54252	2.32462	3.13764	2.05679	2.83414	2.3394	2.50999	2.56312	2.68559	2.21441	2.26724	2.97971	2.27997	2.85031	2.05946	2.99553	2.36547	2.39323	2.21985	1.85298	3.0246	2.47211	2.64357	2.36393	2.49619	2.35819	2.42121	2.16779	2.8761	2.84193	2.45226	2.40888	3.25152	3.0499	2.03525	2.11429	2.55673	2.65995	2.03421	2.46857	2.40768	2.3067	2.32248	2.88347	2.71677
DERL3	1.85138	3.45425	2.91615	3.45875	2.07652	1.22776	1.64587	1.24902	1.80419	2.19291	3.25896	2.78518	1.53415	3.48026	1.48537	4.10759	3.4181	3.17591	0.220139	2.18212	1.01841	2.03388	2.14344	0.414881	0.739947	5.36539	2.24164	1.31705	1.21872	2.42322	2.97316	2.13774	1.34599	2.325	2.88327	1.89187	1.66603	4.03993	0.269551	0.944373	2.00293	3.75003	0.125375	0.625315	3.78497	1.40326	0.890407	3.96249	2.24521
DET1	1.70015	2.03863	2.27996	1.64378	2.00213	1.6846	1.47049	1.57877	1.73125	1.69038	1.50712	1.13197	1.96362	1.60583	1.64945	1.44608	1.80801	1.83694	1.76831	1.38502	1.20387	2.13346	1.07903	1.70498	1.4637	1.2743	1.18227	1.83761	1.13208	1.16318	1.32887	1.48074	1.75214	1.03452	1.21661	1.39483	2.50947	2.556	2.00608	1.02212	1.74568	1.45736	2.21522	1.61646	2.81631	1.87185	1.38719	1.65123	1.42016
DNAJB12	3.46875	3.76756	3.50308	3.54774	3.79104	3.81783	3.57186	3.44333	3.29208	3.60722	3.14693	2.82796	2.70636	3.43676	2.91768	2.87908	3.21885	3.73171	3.00778	3.2092	3.00964	3.6794	3.2077	2.64221	3.30209	2.93284	3.44332	3.13471	3.76911	3.07795	3.20245	3.62141	3.25733	4.43436	3.22121	4.05129	2.75505	3.12975	2.90411	3.94654	3.40387	3.40185	2.87836	3.2165	3.111	2.93654	3.0874	3.9596	3.2991
DNAJB14	1.53407	1.38801	2.09574	2.29892	1.93935	1.9606	1.21547	2.14608	2.34493	1.35923	1.3875	1.8426	1.81125	2.19604	2.13983	1.10252	2.06522	1.61391	2.09814	2.15759	2.30449	2.16241	1.61448	2.22355	2.05248	1.26134	2.15879	2.1351	1.55192	1.97143	1.56536	2.02475	2.32229	2.07355	2.33299	0.960282	2.00295	1.94457	1.95737	1.74631	1.88441	2.37585	2.23803	1.96086	2.05381	2.37815	2.15281	2.13627	2.31741
DNAJB2	3.15	3.1733	2.26002	2.64172	3.46001	3.22544	2.42798	2.75416	3.10736	2.96682	2.86657	1.98131	3.29008	2.86044	2.79376	3.71872	3.17229	2.31841	2.86185	2.5318	3.06059	4.17893	3.08299	2.25727	3.29965	2.77776	2.53976	2.98899	2.56037	3.07854	2.59621	3.99385	1.96768	4.46774	2.90026	3.36228	2.34242	2.72835	2.77546	2.49907	2.35015	2.63311	2.88788	2.524	3.33534	2.49909	2.37937	2.96516	2.16814
DNAJB9	2.73642	3.50909	3.48043	3.83952	4.1905	2.54473	2.49678	3.32051	3.6967	2.03969	2.95278	2.40588	3.46766	3.76751	3.36361	2.69297	3.54033	3.17649	3.1324	2.93811	2.92555	3.58138	3.02742	2.7476	3.57653	3.80328	3.4638	3.07915	3.35085	2.78728	2.45953	3.66275	3.26057	3.23305	2.77436	2.17038	3.50069	3.75615	3.20968	3.06571	2.479	3.48498	3.17665	2.2331	4.20886	2.95287	3.56078	4.08681	3.56986
DNAJC10	2.24659	2.42927	2.65512	3.31385	3.4767	2.77179	2.58716	3.28536	3.13374	2.13898	2.06963	2.36094	3.1545	3.29864	2.61905	1.93181	3.33303	3.06672	2.26315	3.31472	2.81303	3.34413	2.65835	2.47955	2.60397	2.13485	2.7042	2.4431	2.95828	2.82713	3.16677	2.35992	3.45519	3.34118	2.59163	2.54087	4.35249	3.47401	2.13163	2.63256	3.14053	3.44359	2.23403	2.39958	3.28303	2.42903	3.23808	3.19533	3.25554
DNAJC18	0.515319	1.54861	0.958984	1.29363	1.21413	1.06058	0.713781	1.32037	0.80512	0.381561	1.16956	0.426767	0.765809	1.05463	2.03539	0.408898	1.20683	0.635754	2.5866	1.07179	0.458116	1.53446	0.965502	1.89438	0.47838	0.555565	0.503279	1.52278	0.613985	0.714324	0.626161	1.35736	0.659558	1.18131	0.516279	0.607164	1.2908	1.40066	2.75403	0.488046	1.05007	0.498273	2.65564	1.40227	0.366751	1.83482	1.65192	0.816271	1.36393
DTX3L	4.85439	4.18962	5.18202	5.20152	5.6149	4.45109	4.09622	4.33934	5.41305	3.92807	3.41434	4.05141	4.52894	4.9733	3.82119	4.07481	4.16838	4.40631	3.16101	4.33075	3.63315	4.09023	2.96298	3.80514	4.19876	3.14314	4.69577	4.38305	3.80589	4.01984	4.69183	4.95223	3.89074	4.16033	5.01822	3.53483	3.92341	3.4798	2.92829	4.29249	4.55842	4.64937	3.0691	4.16667	3.77252	3.95978	3.53278	5.47868	5.19846
DZIP3	2.30675	2.20444	1.36567	1.68548	2.26129	2.30116	1.06448	1.15165	1.08223	0.834365	1.03816	0.783333	3.05822	1.86071	1.74948	0.639005	1.46293	1.31517	2.14991	1.22678	1.1334	2.38443	0.92502	2.30364	1.72451	1.27685	1.47182	1.82253	1.27883	1.40455	1.9057	1.80322	1.98277	1.72833	1.62187	0.907202	1.33868	2.28508	2.15054	0.915042	1.64887	1.88493	2.27675	2.42464	2.21457	1.8675	1.00374	1.84621	1.55762
EDEM1	2.50696	3.22917	3.22081	3.41867	3.71994	3.11295	3.27326	2.96358	3.1048	2.70922	2.88289	1.99186	2.84295	3.87412	2.4893	2.53037	3.47898	2.87985	2.01717	2.30111	3.48627	2.4986	2.91131	2.43602	3.26295	2.88703	3.45343	2.96507	2.56573	2.7618	3.50428	3.27967	3.8973	2.92116	3.55929	1.95662	3.71412	2.99139	2.2013	3.34725	3.3148	4.30345	2.16725	1.95399	2.70731	2.64513	3.61119	3.46142	3.69001
EDEM2	4.65051	4.72729	4.47392	4.3299	5.54447	4.41943	4.31138	3.942	5.34687	4.79876	4.39313	3.07975	5.05363	3.9744	3.22923	4.57673	4.46846	4.81725	2.5893	3.3945	3.64211	5.01069	3.22507	2.69175	3.83407	3.88326	4.18368	4.46018	4.77304	3.58406	4.29593	4.8479	3.61061	5.14259	3.94228	5.19417	4.67939	4.51688	2.65141	3.46135	4.30941	4.60278	2.276	4.30945	5.19264	3.62796	4.35483	4.22238	4.22441
EDEM3	3.15691	3.36336	3.28225	3.7025	3.49913	3.31611	2.88577	3.43656	5.05408	3.72093	2.52607	2.52645	5.63655	4.85597	3.23041	2.80975	4.37748	3.62248	2.62049	3.75634	3.28258	4.54185	2.99377	2.61276	3.99799	3.86616	4.23452	3.04196	4.20215	3.37186	5.2162	3.6031	4.41352	4.0521	3.74616	3.20904	3.75289	3.55228	2.51485	5.76461	3.77511	4.39462	2.5964	3.2647	4.3923	2.66512	3.73397	4.58478	3.51273
EP300	4.2644	4.2581	4.20521	4.82222	5.50435	3.9666	4.51297	4.35891	4.25809	4.02119	3.69218	3.48312	4.80685	4.48317	4.01437	3.82331	4.51839	3.26212	4.21044	4.10599	4.1968	4.70204	3.82267	4.13566	4.56702	3.37924	3.87272	4.21152	3.78624	4.15415	4.16072	4.03203	4.27486	3.87675	4.20577	3.32065	4.73567	4.77022	4.20848	4.29991	5.11643	4.64023	4.25091	3.73916	4.32285	4.06125	4.39871	4.4031	4.10382
ERCC8	1.14808	0.992137	1.5271	1.36924	1.19479	1.07788	1.21948	1.84666	1.59044	0.955961	0.80128	1.18452	0.813125	1.79092	1.02853	0.522053	1.18227	1.10214	1.11709	1.79664	1.48449	2.32372	0.851689	1.11431	1.89953	0.830293	1.08366	1.16882	1.26928	0.86499	1.02608	1.1347	1.67317	0.95666	1.50184	0.976346	1.39016	1.88591	1.15077	1.01482	1.45351	1.00287	1.17993	1.13834	0.94842	1.18565	1.08574	1.08677	1.47456
ERLIN1	3.4408	3.29364	4.29595	3.96308	3.68656	2.82609	3.47265	3.46028	3.24371	3.82746	2.8225	2.98619	3.15452	3.72424	2.34803	1.83287	3.24509	3.00071	1.82329	3.81728	4.01261	3.46866	3.05778	1.84576	2.7547	2.8713	3.3358	2.97989	3.72411	2.96679	2.46946	2.78645	3.86087	2.47869	3.52193	2.63747	2.8387	3.60998	1.94971	3.60652	2.9057	3.87637	1.82891	2.48444	2.47653	2.32319	2.91957	3.57949	3.92172
ERLIN2	2.19669	2.99296	3.51302	3.08314	3.33005	2.84185	2.46159	2.25807	3.94372	4.00529	2.57263	2.9165	3.3468	3.78832	2.58207	2.34223	2.66861	2.98987	2.42377	2.24707	4.08725	2.42956	2.45577	2.70467	3.1434	2.2898	3.44497	2.97285	2.35724	2.59524	2.97828	2.40779	3.85917	2.72964	3.27686	2.20368	2.41803	3.84325	2.57706	3.22161	3.27391	3.35161	2.75958	2.46998	3.21715	2.48032	2.56267	1.98576	3.73542
ESR1	0.0986949	0.267032	0.0699612	0.243293	0.012147	0.0761871	0.0538315	0.210529	0.112564	0.0112145	0.367615	0.0161121	0.0674199	0.204543	0.319347	0.0900519	0.442434	0.123647	0.489844	0.0363084	0.018783	0.119007	0.22926	0.195001	0.0408424	0.127283	0.0416665	0.278164	0.0415062	0.177522	0.0986132	0.199119	0.0924456	0.242727	0.194238	0.0756604	0.149701	0.300604	0.630804	0.0439476	0.398096	0.11567	0.35026	0.861659	0.182748	0.327156	0.29189	0.241281	0.264938
FAF2	3.64835	3.59135	4.02375	4.52998	4.14626	3.76859	3.80675	3.35108	4.16785	3.58896	2.93219	3.20948	4.13807	4.08829	3.29033	2.63634	3.59849	3.76723	3.12269	3.96875	4.19087	3.76363	3.19115	3.0594	3.499	2.68967	3.69908	3.37071	3.16637	3.81562	3.99279	3.81893	4.46405	3.79223	3.86939	3.28061	4.4905	4.54571	3.03886	3.28576	3.79459	3.7419	3.07659	3.35992	3.86511	3.23285	4.07756	3.69167	4.07516
FANCL	3.11621	1.91459	3.00641	2.45397	2.56454	2.81872	2.67696	2.64104	3.20533	2.0993	1.87331	3.25659	2.76639	2.81344	2.21184	2.35365	2.51234	2.79045	2.33217	3.30761	3.35942	3.66929	1.7907	2.47432	2.82755	1.3156	2.70129	2.78325	2.16799	2.8449	2.87682	2.35299	2.88481	2.79636	2.991	2.23353	3.39276	3.502	2.13878	2.69019	2.9126	2.78433	2.42938	3.77081	3.26576	2.60776	2.2716	2.40249	2.42429
FBXL12	3.4079	2.50013	2.85425	3.44745	3.1978	2.95151	2.83268	2.87003	2.71887	3.23693	3.22247	2.88088	3.44527	2.84246	2.75101	2.44416	2.69677	3.00755	3.12751	2.94066	2.65052	4.86725	2.5971	2.49347	2.85109	2.20846	2.69157	2.89258	3.43525	2.94036	2.43771	3.49159	2.78552	2.99531	2.53596	2.67964	2.3641	3.54103	3.01282	3.30122	3.29932	3.07793	2.89456	3.44022	3.14211	2.93263	2.4688	3.333	2.60534
FBXL13	0.197258	0.178189	0.16678	0.39203	0.555318	0.211657	0.405951	0.27935	0.348088	0.293368	0.156843	0.175332	0.769582	1.06571	0.358852	0.165618	1.02109	0.225969	0.461749	0.347449	0.23112	0.657404	0.175163	0.206627	0.420929	1.20103	0.228666	0.312918	0.193239	0.496616	0.526565	0.350548	0.402743	0.596038	0.179759	0.652106	0.233542	0.598973	0.474083	0.402333	0.741167	0.609224	0.423313	0.978462	0.603935	0.522843	0.784845	0.333041	0.256381
FBXL14	4.43676	4.12093	3.91953	4.05925	3.76461	3.70803	4.47079	4.08777	3.28724	4.68335	3.52076	1.96861	4.14414	4.41741	2.53492	3.64394	3.94125	3.51689	2.85142	4.0233	4.2639	4.71575	3.03437	2.40756	3.13931	3.13641	4.49818	3.40276	4.06063	3.04665	3.16728	3.99781	4.3039	3.02075	4.20334	2.55283	2.40935	2.91466	2.74973	3.61464	4.16928	4.33132	2.82847	2.36992	3.77161	3.19114	3.40941	3.44427	4.37409
FBXL15	3.55979	3.61096	3.0065	2.84012	2.99322	2.7155	2.94644	3.00732	2.57771	3.54909	3.82166	4.09259	2.09387	3.10605	2.72582	4.59183	3.09268	3.45343	3.26914	2.76115	3.97067	4.50058	2.71211	2.46102	2.5652	3.4672	3.35252	3.25287	3.68015	3.06329	3.13505	3.48417	2.30112	2.748	3.48407	3.66202	1.78453	2.14332	2.96937	2.8579	2.85488	3.66566	3.22244	2.91838	3.2186	3.01967	2.35619	2.92042	2.66219
FBXL16	0.468746	4.87323	2.16946	1.68998	1.95696	0.287554	3.10694	0.662229	0.495547	1.70175	1.2947	4.23186	1.1492	3.85388	0.664409	1.1038	4.54592	0.189464	0.873641	2.20529	3.98694	1.56006	2.28088	0.342552	3.24056	1.28724	2.38176	0.964404	0.590729	1.90365	3.42759	4.52225	2.5063	0.5956	1.99094	1.51932	2.77857	0.410492	0.994376	1.25851	1.39158	2.23506	1.31218	0.290533	0.904505	0.53332	0.485007	0.70931	1.5618
FBXL18	2.29047	2.84498	0.945958	2.63196	1.98529	2.25184	2.34876	2.62314	3.09931	2.43578	1.2472	0.738786	3.6899	2.22128	1.89924	2.03194	2.22888	1.74917	1.78352	2.06442	1.70979	3.71658	1.7768	1.51074	3.17595	1.29107	1.29956	2.28823	1.59097	1.71954	3.24967	2.5154	1.33875	3.17748	1.81779	1.52531	1.74805	2.31651	1.73963	2.02086	2.48569	1.98391	1.75501	2.01019	1.96514	1.51457	2.44712	2.68223	1.61934
FBXL19	3.53428	3.78021	2.55206	4.12576	3.15297	3.74667	4.09308	2.74445	3.19712	3.09831	2.81798	2.42579	3.01677	2.90588	2.56453	3.19738	2.99523	2.8864	2.0841	4.11656	3.36636	3.69939	2.88938	1.68256	2.78625	2.26507	2.90291	2.77793	2.09854	2.85212	3.45229	3.41675	2.50327	3.37863	3.1366	2.88843	2.19151	1.99609	2.03873	3.90455	2.92632	3.24562	2.38899	3.41185	3.5394	2.10053	2.90546	2.90463	2.34012
FBXL20	1.39959	1.78036	2.03481	2.44727	2.88995	2.08089	1.97964	3.23374	2.08074	1.36928	1.49771	1.38384	1.97764	2.52355	2.46798	1.38713	2.33744	1.44593	2.4801	2.34284	1.72991	2.54053	1.83878	1.98056	3.87775	1.30114	1.46811	2.44915	1.91342	1.81407	1.43939	2.09004	1.88049	2.08685	1.85049	1.245	2.40413	3.32054	2.41906	1.12619	2.54283	1.76955	2.53685	2.37895	1.96514	2.23529	2.5	1.63883	1.70389
FBXL22	0.301221	0.832609	0.252243	0.912578	0.265371	0.428365	0.340577	1.36982	0.849318	0.355662	0.736338	1.8738	1.08021	0.700873	3.40224	0.700644	0.768214	0.275274	3.75028	0.454938	0.346879	1.30181	1.00174	4.49333	0.312726	0.403798	0.349765	2.88006	0.384884	0.82566	0.529779	1.31517	0.371393	0.838173	0.421897	1.12018	0.785311	0.71757	4.17364	0.51138	0.682192	0.353219	4.51458	0.570895	0.98357	3.67626	0.519809	0.443669	1.45215
FBXL3	2.99404	2.62042	3.46888	2.96828	4.31657	3.04296	3.25988	3.1537	3.86016	2.71898	3.11331	2.99115	3.20325	3.43476	3.3634	2.5754	2.92841	2.93837	3.38874	2.97661	3.48882	2.05178	2.80037	2.98403	2.87646	2.37934	3.6978	3.25609	3.20861	3.43404	2.59732	3.07745	3.52799	3.30899	3.14954	2.79948	2.84179	3.21527	3.33092	3.16078	3.58477	3.08227	3.24078	2.65517	2.29452	3.62595	3.23527	3.52235	3.31167
FBXL4	1.44038	2.64195	2.38224	2.09317	3.10968	1.88742	2.11537	2.49749	2.37802	1.81408	1.44778	2.00383	2.67609	2.48519	1.89575	1.12293	2.04585	1.34474	2.02407	2.39619	2.42103	2.78448	1.6012	1.65556	1.85023	1.6938	2.20726	1.84702	1.59836	2.04202	1.58607	2.0152	2.80139	1.71259	2.251	1.49662	2.2858	2.12658	1.97121	1.50334	2.84363	2.37517	2.15609	1.51501	1.86457	1.88248	2.49971	1.85135	2.59688
FBXL5	4.33615	4.11567	3.61218	3.94853	2.58915	3.24065	3.66929	4.03853	3.94933	3.38171	3.89622	3.87875	3.75933	4.15313	4.79414	3.53654	3.62474	3.98976	5.24775	3.62139	4.20219	3.75267	4.17928	5.01857	3.53029	3.64228	3.92844	4.50264	2.74264	4.20405	3.39399	4.23979	4.27164	3.83752	4.209	3.31882	4.64923	3.75116	5.08111	3.53181	4.00709	4.08466	5.09871	3.22429	4.44144	4.99223	4.20969	4.28313	4.90044
FBXL7	1.13846	2.24082	0.639749	2.73044	0.75572	1.16922	0.842355	2.88876	1.82919	0.643745	2.13525	0.551613	0.981512	1.58868	3.18404	0.991282	1.78098	0.813844	3.95314	0.699195	0.813912	1.56956	2.30372	3.40692	1.30463	1.26655	0.689568	2.61457	0.365528	1.67222	0.742664	2.65589	1.24481	2.0432	1.40421	1.5592	2.5236	1.685	4.20916	1.30676	2.14717	0.726338	3.73949	0.780419	0.932742	3.16956	2.82469	1.33291	2.6015
FBXL8	1.24322	0.685578	2.20218	1.78341	1.75562	2.14162	1.5921	1.51463	1.77385	1.66661	1.49158	2.46998	2.37141	2.24937	1.31484	1.63385	2.30731	1.22344	1.18731	1.99677	2.16374	1.41847	2.04605	0.982975	2.16548	1.19592	2.0608	2.0515	1.48931	1.8893	2.34641	1.12244	1.056	2.10537	1.76235	1.90047	1.3769	0.966276	0.906394	0.995865	1.92621	2.16471	0.944799	1.9991	2.1384	1.04692	1.98197	2.01351	1.22856
FBXO10	0.509209	1.105	0.629385	0.725548	1.21778	0.50698	0.462258	0.681995	0.558834	0.425322	0.952519	0.664548	0.475222	0.612467	1.00809	0.358296	0.795754	0.454243	1.04526	0.471076	0.428109	0.622229	0.421187	0.93463	0.438373	0.56474	0.470699	0.82355	0.316931	0.489954	0.595594	0.565451	0.997638	0.704556	0.647414	1.12557	0.697081	0.822827	1.07822	0.716323	0.641101	0.791346	1.08971	1.14849	0.139534	0.873338	1.04947	0.835143	0.751975
FBXO11	2.09556	1.99629	2.55223	2.79724	2.46693	2.61866	2.56051	2.79065	3.04521	1.89774	1.90399	1.15381	3.01485	2.75321	2.63956	1.99544	2.41625	2.20629	2.60558	2.89702	2.45655	3.17197	2.15092	2.73499	3.1915	1.64435	2.28394	2.76446	1.6349	2.37258	2.60652	2.76546	3.35046	2.4738	2.39121	1.63933	3.20048	2.8502	2.66147	3.21192	2.84641	2.83663	2.62735	2.23992	2.72279	2.41021	2.59746	2.28328	3.01014
FBXO15	0.0432912	0.054365	0.0153719	0.0743615	0.35489	0.0203361	0.0239222	0.0649713	0.0166922	0.00822853	0.0337027	0.0298362	0.0866235	0.0501258	0.0249896	0.00377892	0.199088	0	0.0863736	0.0342417	0.0689971	0.301191	0.0340142	0.0104762	0.0265463	0.0412064	0.143298	0.0612729	0.013653	0.122465	0.00471706	0.0248254	0.0285308	0.0523903	0.0220558	0.0410713	0.100479	0.0950318	0.0766964	0.0172131	0.0180503	0.0489779	0.0421628	0.5043	0.441578	0.153082	0.0273363	0.0515681	0.0613318
FBXO17	0.364688	1.42014	0.153726	1.90189	1.81007	0.610555	0.147242	1.07373	0.988419	0.0995988	1.09138	0.293384	1.1897	0.663242	1.8927	1.65234	0.891566	1.76998	2.16347	0.367516	0.119582	3.00242	0.82487	1.71894	1.72437	0.770628	1.3199	1.25611	0.225663	0.750765	1.72154	1.3386	0.321444	1.40282	0.283632	1.00747	0.769493	3.78069	2.41682	0.475044	0.765618	0.158112	2.34579	1.05416	0.871411	1.78155	1.44697	0.249617	0.968085
FBXO2	0.63923	0.783612	0.66042	2.16593	3.30611	2.59148	0.172374	0.712886	1.27936	1.29349	1.26266	0.324624	0.916674	1.2505	0.634871	5.68072	4.99513	1.58341	2.3049	1.46748	3.14266	3.87987	2.11352	0.779371	2.60564	1.44991	1.49469	2.26989	0.147122	2.00737	1.83104	4.3696	0.642409	4.8675	1.22583	4.61283	2.30193	4.32242	1.50348	1.28072	0.283815	1.81377	1.56791	3.52433	0.862277	1.66943	0.57652	1.52682	0.946341
FBXO21	2.68841	3.02876	3.27772	3.01148	3.38932	2.68608	3.40652	2.95261	3.18113	3.3354	2.68482	2.79079	3.03548	3.54085	2.93201	3.30998	3.06172	2.8388	3.25923	3.3949	3.46422	3.83509	2.47964	2.93788	3.05852	2.28772	3.21407	2.77423	3.40776	2.66905	3.21634	2.85806	3.22022	2.67238	2.83593	2.59469	3.07413	3.41148	3.02198	3.24198	3.41251	3.64195	3.2367	2.99992	2.19948	3.21153	3.04326	3.00287	2.79462
FBXO22	1.64791	1.17056	1.92556	1.78285	1.84816	1.45695	2.12988	1.52103	1.67658	1.84486	1.39221	1.80228	1.74147	1.53845	1.39377	1.16268	1.49692	1.73372	1.30532	2.02998	2.02681	1.98554	0.936187	1.38285	1.54716	1.4203	1.73966	1.47222	0.959559	1.32854	1.25018	1.38892	1.96121	1.72257	1.78366	2.24469	1.57084	2.06475	1.1445	1.28827	1.6239	1.86162	1.20073	1.83727	2.49175	1.54337	1.39222	2.20021	1.80857
FBXO27	0.254023	0.975392	0.195725	1.87869	3.54539	1.69288	0.223077	0.682277	0.444333	0.0618433	1.26518	0.826212	1.25698	0.694922	1.46564	0.638393	1.15978	0.8403	1.57321	0.282176	0.324434	2.99638	2.95711	1.52146	0.532985	1.21121	1.01839	1.21963	0.291163	1.88018	2.18934	0.77567	0.169729	0.476915	0.119909	1.0078	1.17787	2.48435	2.17009	0.447053	0.376733	0.322507	1.8703	1.73703	0.33655	0.968127	0.85897	0.371798	0.847528
FBXO30	1.12626	1.70605	1.60192	1.97675	2.2704	1.53243	1.25416	2.2004	2.19329	1.1103	1.34887	1.8504	1.62976	1.98543	3.09777	0.939939	1.07526	1.4042	3.74295	2.49184	1.03333	1.73193	1.36264	3.90245	1.64254	0.990378	1.8903	2.36846	1.29506	1.3092	1.63954	2.28844	2.15283	1.97646	1.96775	1.74599	1.74366	1.91152	2.94873	1.40081	2.34719	1.54872	3.56034	2.65412	1.03881	3.07365	2.04943	1.48875	2.39426
FBXO31	2.19423	2.50612	3.10344	2.74565	2.60814	2.30053	2.41248	2.68986	3.07915	2.71994	3.04484	2.72361	1.97198	3.18189	3.33117	2.88608	2.43279	2.05828	3.43245	2.78858	2.51422	2.57848	2.17726	2.94308	2.07023	1.68486	2.51187	3.10381	1.94379	2.12643	3.06825	2.45375	2.19404	2.43211	3.11227	1.97084	2.17666	2.33722	3.12822	1.84284	3.96614	2.36695	3.70466	2.18727	1.8155	2.81362	2.75221	2.31896	2.52217
FBXO32	1.52789	3.29151	1.70676	3.29546	2.95017	2.69099	0.617781	5.45519	3.49262	3.30465	1.49554	1.75034	2.11025	3.17004	5.78013	3.24401	2.27946	1.33001	6.6352	1.53332	3.06041	2.07574	3.55428	5.83193	3.20838	1.42313	2.31547	4.46682	2.20106	3.03607	3.28407	4.25332	2.59253	3.59007	2.31896	2.92282	5.0974	2.36371	5.92306	2.20733	3.3147	3.32756	6.8481	2.68151	1.55753	5.45142	5.30609	1.68578	4.09505
FBXO4	1.81826	1.45277	2.58717	1.55733	1.78888	1.91804	2.1226	2.00272	1.92143	1.92579	1.70953	2.44197	2.11289	2.15183	1.71223	2.95168	2.00176	1.86399	1.61842	1.71742	1.71952	2.25848	1.65368	1.77732	1.01683	1.36677	2.21317	2.1163	1.84234	2.01848	2.11334	1.44711	2.29333	3.31698	2.50232	2.34136	2.46746	2.15335	1.6296	1.31089	1.3573	2.1354	1.64119	2.64904	2.74951	1.98938	2.63355	1.86254	2.64755
FBXO40	0	0.00825007	0	0.077646	0	0.00213934	0.0460858	0.00192848	0.00583847	0	0.0352133	0.00571859	0.0154713	0.00560184	0.00955049	0.00395013	0.434312	0.0288985	0.13323	0.0745138	0.00433935	0.00360512	0.0134298	0.0145812	0	0	0	0.0216476	0	0.0110916	0.00493071	0.00326834	0.034021	0.0348024	0.00331527	0	0.00329265	0.0151334	0.0800813	0.0179892	0.00946278	0.0109226	0.0276865	1.0056	0.00984533	0.166836	0.0379615	0.0457075	0.0157236
FBXO41	0.890395	2.09936	1.80854	2.0261	2.92801	2.29958	1.48825	3.05399	2.59933	1.89507	1.21853	2.19219	2.41016	2.39979	0.985996	2.17265	1.09283	1.0149	0.736492	3.44084	2.17855	3.31086	0.646413	0.747182	2.63522	0.500506	1.98993	2.03933	0.618416	1.25925	2.60774	1.96988	2.39703	1.38727	2.75744	1.58693	0.908939	1.76215	0.696703	1.50365	2.64654	2.08446	0.801435	2.85597	1.98107	1.33447	1.31128	2.51418	1.67556
FBXO44	1.05832	2.09524	2.14477	1.50268	2.77424	1.62317	0.385608	1.63861	1.80386	1.34077	2.09404	2.27571	0.883299	2.05957	1.84187	4.17309	2.78081	0.922694	2.62982	2.55286	3.58297	2.04587	1.56301	1.53804	2.60203	1.25548	1.55607	2.01025	0.679451	1.6451	2.16871	2.29735	1.05521	2.6376	2.01013	2.38042	2.11057	2.27434	2.30273	1.09217	1.09473	2.1432	2.2377	2.38329	1.8347	1.93696	1.28568	1.57411	1.43438
FBXO6	4.02082	3.40393	3.14612	2.70518	2.76351	2.23031	1.2066	2.94407	3.15583	2.86276	2.66686	3.43004	1.9796	3.69882	2.39261	5.0953	3.79625	2.2423	2.90833	1.58507	3.75332	1.99632	2.57782	2.32885	3.81754	3.39499	4.38332	2.7335	2.22063	2.29016	3.44956	4.05249	2.22695	3.66115	4.97057	3.92807	2.94112	3.26635	2.37185	3.46245	2.3466	3.54673	2.74477	2.8463	2.79821	2.71062	1.85255	2.76471	4.58938
FBXO7	4.10057	3.75573	3.8274	3.42929	3.85556	3.1143	3.36484	3.60665	2.8526	3.97624	3.67739	3.07691	2.81477	3.66749	3.2285	3.07565	3.68277	2.73388	3.33015	3.80856	3.43561	3.54259	3.30648	2.9463	3.06313	3.30574	3.33749	3.24494	3.23554	3.16065	3.4477	3.45264	3.51645	3.32805	3.54008	3.18446	3.47026	3.55403	3.247	2.98079	3.4164	3.45919	3.28638	2.67289	3.70014	3.44148	2.99669	3.5343	3.9333
FBXO9	2.69219	1.94518	2.51026	3.15469	2.71158	2.27209	2.06247	2.12019	3.03415	2.52699	2.1949	2.26352	2.78477	2.26138	3.29127	2.62692	2.49535	2.27354	3.3111	2.77295	2.1665	2.87035	2.48787	3.38445	2.52211	2.54578	2.17212	2.62771	2.76136	2.66863	3.79704	2.61218	2.53395	2.25341	2.40297	2.23623	2.63045	3.18774	3.26688	2.03978	3.14342	2.16744	3.40633	2.27966	1.95828	3.00531	2.43217	3.15507	2.67224
FBXW10	0.099873	0.0111312	0.105166	0.0947636	0.0738195	0.0200996	0.547943	0.0486885	0.164127	0.0571077	0.0473573	0.0381836	0.147637	0.0594031	0.109013	0.0264669	0.449535	0.184762	0.156817	0.12987	0.0347936	0.033728	0.171603	0.0390522	0.0150517	0.0435965	0.0313363	0.162346	0.613782	0.0732945	0.3714	0.00881128	0.0736405	0.328337	0.022241	0.182111	0.0567456	0.14641	0.129409	0.158074	0.195555	0.075718	0.0298911	0.790579	0.082119	0.0945518	0.05937	0.146275	0.053886
FBXW11	3.27301	3.15306	3.44341	3.70578	3.22427	3.08989	3.07644	3.29627	3.19921	3.04382	2.67042	2.09146	3.05335	3.53484	3.2623	2.17388	3.17208	2.59466	3.49716	3.35262	2.28445	3.46343	3.03651	3.22422	3.68702	2.78506	2.85644	3.01337	2.84647	2.86165	2.81669	3.3224	3.63149	2.63633	2.83819	2.25233	4.43045	3.73889	3.18159	2.76466	3.05903	2.977	3.36031	2.23746	2.821	3.11139	3.33712	2.75337	3.87386
FBXW12	0.0257986	0	0.0644454	0.299487	0.338343	0.0605768	0.156522	0.0766536	0.105441	0.0145894	0.0257375	0.0241466	0.106982	0.0423066	0.00406628	0.0528115	0.695106	0.156579	0.309412	0.312492	0.0998828	0.293262	0	0.0905171	0.0560276	0	0.0113471	0.0426181	0.0241722	0.0188033	0.0696545	0.00555122	0.284532	0.0824262	0.0553436	0	0.159006	0.393613	0.177304	0.0846489	0.143266	0.167001	0.046751	1.54817	0.14373	0.118027	0.0269895	0.0631824	0.0453487
FBXW2	2.51266	2.39415	2.67665	3.48487	3.9246	2.77568	2.76033	3.20577	2.83514	2.4381	2.30699	2.47045	2.60668	3.0862	2.88225	2.35998	2.95359	1.76101	2.93605	3.00305	3.00104	2.35052	2.41877	3.11995	2.71962	1.89627	2.44769	2.81865	2.61937	2.50801	2.15333	2.8355	2.93093	2.68252	2.80554	2.12991	3.08696	2.92865	2.9165	2.8034	2.76923	2.88224	2.92877	2.29173	2.09161	3.04361	3.1116	3.10081	3.05465
FBXW4	2.80053	2.74336	2.33958	2.70082	3.68238	2.79085	2.61742	3.19046	2.69142	3.03973	2.89344	2.6153	2.78343	3.31583	3.595	4.27883	3.58386	2.5955	3.58777	3.19256	3.4572	4.16981	3.4156	3.17863	3.09761	2.96005	2.90848	3.49806	3.52046	3.3364	3.1102	3.29515	2.55218	3.19847	3.38232	2.59908	2.07405	2.10051	3.5714	2.67963	3.16413	3.31573	3.50436	2.94528	3.74498	3.31398	2.60977	2.62589	2.56716
FBXW5	5.29853	6.11625	5.16077	5.18945	5.04208	5.48248	5.11463	5.53284	5.00979	6.08968	5.38634	5.10296	5.27389	5.74954	5.41284	6.25014	5.0913	4.63007	5.61167	4.86229	5.24563	4.5418	5.4054	5.33154	6.30994	5.18903	5.21385	5.25866	4.58478	5.2163	5.28828	5.64409	4.5155	5.45695	5.45176	5.11273	4.38773	4.12969	5.33205	5.26096	5.24751	5.74768	5.22156	4.30256	5.18495	5.61901	5.45955	5.4246	5.10048
FBXW7	1.03003	1.84388	1.50624	2.07287	1.58626	1.60321	1.61595	1.45905	1.61805	1.05208	1.44419	1.68675	1.71066	1.72566	1.84809	1.01495	1.79507	1.50617	1.87501	2.13828	1.5096	1.57388	1.5666	1.38003	1.5663	1.55256	1.49942	1.50884	1.32166	1.77766	1.62096	1.26852	1.87907	1.74573	1.95311	1.32281	1.90323	1.76453	1.64538	1.73857	1.85733	2.07104	1.59412	2.02846	1.24218	1.48965	1.7419	2.59806	1.63837
FBXW8	1.95661	2.41637	2.61831	2.94863	2.28735	2.18502	1.88672	2.27647	2.16249	2.4126	1.98537	1.75911	3.0555	2.00919	2.38264	1.76401	2.71358	1.86772	2.12078	2.5424	2.3674	3.30819	2.01415	2.36728	2.5021	1.7863	2.12768	2.44112	2.54593	2.13729	2.51655	2.16375	2.71736	2.16719	2.41638	1.61039	1.78131	2.76355	2.21787	2.46381	2.77925	2.84887	2.33484	2.05758	1.65392	2.27924	2.75586	2.03614	2.37553
FBXW9	2.56609	1.91014	2.60443	3.11712	2.6525	2.32664	2.77999	2.75431	2.19615	3.16847	2.19962	2.10339	1.87461	2.43805	1.46728	1.55851	2.62525	1.4493	1.6269	3.03121	3.09214	1.78324	2.4112	1.19033	3.17053	1.73815	2.59347	1.98329	2.67679	2.28526	1.83142	2.38857	1.93009	1.92457	2.8075	1.74211	1.69157	1.71574	1.59712	1.92955	2.52033	2.531	1.29973	2.81266	3.34767	1.49207	1.88683	2.00138	2.1108
FKBP8	6.72357	7.56065	5.471	5.52368	5.81974	5.82809	5.70436	5.84991	5.61015	6.82989	6.98656	5.98706	6.04466	6.17628	5.91287	7.01114	5.97068	5.38162	6.19801	5.95018	5.99632	5.71638	5.86818	5.30031	5.39693	6.48142	5.81901	5.88016	6.36251	5.75898	5.03689	6.96271	4.22847	6.4635	6.2047	6.78523	4.55807	4.61529	6.02058	5.24223	6.0631	5.98866	6.15804	6.12271	6.55741	5.71283	5.87886	5.38516	5.89974
FOXK1	2.59929	3.5692	2.03216	2.88395	2.90375	2.74327	3.46696	4.23904	3.75221	3.47174	2.49206	2.38238	4.2962	4.02483	3.26356	2.73048	2.99268	2.71469	3.31977	3.56598	3.55883	4.713	2.87936	3.10092	3.17988	1.92785	2.75446	3.2525	2.93956	2.73058	3.89703	3.02757	2.90315	2.68332	3.24303	2.46878	2.62873	3.00393	3.25154	2.63333	3.88551	2.55051	3.44218	2.79866	2.15287	2.9936	3.21326	3.20515	2.42846
FOXK2	2.75017	2.76211	2.84986	3.27044	4.65438	3.31623	3.57699	3.0905	3.08004	3.25601	2.56263	2.36407	2.46826	3.38617	2.48409	3.16396	3.25672	2.94633	2.60699	3.78651	3.04388	3.1252	2.84674	2.37772	2.55839	2.13951	2.83044	2.61031	2.40039	2.94409	2.70532	3.15061	2.94777	2.70979	3.04073	2.33231	3.13004	2.37343	2.54724	2.72963	3.86794	3.00577	2.74807	2.44248	3.13407	2.51991	2.86605	2.94675	2.74405
FOXO4	2.20443	3.19422	2.39097	2.72874	3.48017	3.01311	2.45517	3.07302	2.59191	3.37141	2.50923	2.24911	2.58132	3.16778	3.28174	1.92291	2.19386	1.92878	2.89226	2.6603	3.52843	2.67732	2.19932	2.59266	2.40441	2.14581	2.35584	3.22186	1.54554	2.02378	2.72442	3.29749	1.82357	2.96479	2.57107	2.19949	2.29586	1.93715	3.04105	2.63171	2.65733	2.49999	3.31497	2.60636	2.69966	2.90845	1.93228	1.92545	2.42354
FOXRED2	3.51627	4.47181	2.57346	4.00824	4.28269	2.68062	4.27826	3.2498	3.53777	4.48113	2.88935	3.89969	2.36244	2.94917	1.95836	3.85319	3.43869	2.10252	2.6685	2.96361	4.37813	4.42573	2.21587	1.7541	2.94435	2.17821	2.8967	3.1572	1.62374	2.88748	3.92029	2.81507	3.02015	2.37573	3.22422	2.90234	3.86025	3.1742	2.81753	2.19584	3.78785	3.9919	2.69355	2.80731	4.23166	1.98194	2.57655	2.98416	2.58844
FZR1	3.72909	3.60212	3.03078	3.80775	3.7626	3.58629	3.65937	3.68993	3.51999	4.21681	3.74426	3.44236	3.40669	3.72107	3.03166	3.4856	3.46693	2.72013	2.85069	4.11209	3.9298	3.6734	3.73195	2.69388	4.24486	2.66252	2.93913	3.24237	3.64745	3.41108	3.09883	4.05533	2.64566	3.51022	4.11343	3.38272	2.33191	2.75118	2.80998	3.61611	4.10018	3.73013	2.98662	3.49244	3.58973	3.04621	3.1864	3.48621	2.95467
GAN	1.0055	0.553753	1.30425	1.35409	2.13042	1.46714	1.13323	1.3716	1.32763	1.33535	0.959108	2.25146	1.62703	2.16722	1.66368	0.590173	1.54099	1.58302	1.4706	2.81125	2.32715	1.60013	1.99717	1.47495	2.29805	0.779786	1.52687	1.54597	1.74033	2.22009	1.68088	0.764811	1.66844	1.34721	1.76265	0.901376	2.17829	1.88147	1.57708	1.18625	2.17263	1.54962	1.59137	1.64266	2.0091	1.30394	1.45782	1.3471	1.16576
GATA3	1.77601	2.73667	0.791326	1.7183	0.812068	1.55945	0.536594	2.26474	0.47687	0.657735	2.49202	0.913145	0.625142	1.55723	1.19487	0.81523	1.9311	0.58879	0.662141	0.492397	1.91977	0.586523	0.867007	1.09982	0.199889	1.61182	0.652141	0.843577	1.38286	2.43746	1.32412	1.11484	0.590323	1.88745	1.41623	1.57301	1.59643	1.37318	0.411628	0.700513	0.97638	1.02285	0.506148	1.46804	2.94291	1.59509	1.23672	1.59267	1.81652
GLMN	1.64462	1.03676	2.18154	2.01501	1.42503	1.90044	2.35636	1.37989	2.14422	1.72889	1.04571	2.59198	1.51299	1.90252	1.5928	0.975572	1.73876	1.12093	1.53876	2.06848	2.09467	1.83356	1.12945	1.30722	1.26554	0.812265	2.28001	1.52812	1.85905	1.60606	1.55197	1.71084	2.6649	1.37171	2.33626	1.29731	1.58135	2.32392	1.34318	1.82003	2.44781	1.93869	1.35134	2.24478	1.30426	1.50553	1.96914	1.69679	2.11435
HACE1	0.599777	1.27326	0.838091	0.943134	1.51673	1.11424	1.14921	1.29328	1.2	0.978865	0.696639	1.0912	1.52368	1.5577	1.38125	0.361846	1.364	0.71994	1.57503	1.18577	1.46129	1.10309	1.29429	1.38153	1.71045	0.55242	1.19875	1.21387	0.852322	1.1656	0.892919	1.66264	1.27526	0.985075	1.32968	0.827808	1.05407	1.20551	1.52178	1.05781	2.42603	1.53413	1.56128	1.61034	0.738131	1.25126	1.31789	0.71738	1.29505
HCFC1	4.4914	5.28594	4.37645	5.34605	5.72687	4.54136	5.33203	4.73031	5.25193	4.71415	4.07163	3.11418	5.98888	4.58102	4.11309	4.10691	4.70408	4.41923	4.56178	5.77309	4.5564	5.86635	3.8918	4.16725	5.29187	3.17674	4.36337	4.4601	4.26124	4.30842	4.48634	4.82297	4.00333	3.77457	4.93589	3.15696	4.23685	3.96771	4.63318	4.87773	5.6543	5.42801	4.59614	3.78488	4.33732	4.26469	4.92044	4.73498	3.8841
HECTD1	3.3658	3.06978	3.62653	3.67577	4.10344	3.04611	3.59016	3.37426	3.87884	3.4185	2.6446	2.88577	3.9809	3.83705	3.52704	3.06188	3.39057	3.38804	3.58604	3.72624	3.9569	3.77694	3.6638	3.72895	3.73727	2.81384	3.30384	3.43609	3.56277	3.84828	3.43425	3.32296	4.03552	3.14647	3.77194	2.7883	4.14168	3.35803	3.36885	3.75715	4.76875	3.99652	3.46561	2.71018	2.59391	3.29217	4.03503	3.41201	3.21748
HECTD2	0.467269	0.795931	0.206197	0.927007	1.01853	0.698134	0.561945	1.42537	1.01514	0.231466	0.413642	0.553396	0.534336	0.658352	1.95179	0.408974	0.676203	0.525966	1.92214	0.218894	0.115001	1.71348	0.93154	1.96484	1.48698	0.282674	0.423975	1.26376	0.844432	1.00776	0.628769	0.950379	1.18539	0.985711	0.397098	0.434497	1.05785	0.976214	1.89284	0.352923	1.40207	0.878395	1.9216	0.938123	0.582126	1.83897	1.39344	0.812186	1.24991
HECTD3	4.17249	4.32917	4.63426	4.06661	4.16065	4.25965	4.08991	3.41053	3.96106	4.75361	4.58107	4.40879	5.92712	4.7844	3.5792	4.47994	3.97373	4.51327	3.43551	4.22652	4.59107	3.94723	3.45522	3.22565	5.36706	3.72474	4.42975	4.77891	3.95295	4.043	4.3419	4.64227	4.13618	4.59316	5.41081	3.9653	3.61938	4.37799	3.4164	4.92303	4.57158	4.56127	3.17265	4.57148	4.43667	4.18014	3.65576	4.73148	3.93788
HECW2	0.428086	1.58877	0.599066	1.27051	0.382565	0.977565	0.612012	1.54142	1.31498	0.318695	0.443036	0.290003	0.682929	0.653043	1.283	1.15594	1.39692	0.696581	0.841238	0.375332	0.565456	0.9671	1.50034	0.990613	0.73766	0.213101	0.544941	0.522748	0.237281	1.08981	0.491002	1.69541	0.864486	1.30421	1.06037	0.678745	2.58563	1.00884	0.623142	1.04123	1.13072	0.485715	0.625819	0.723408	0.675467	0.579755	2.36534	1.08656	0.91671
HERC1	1.61668	2.09424	2.06325	2.50887	2.0909	1.76803	2.03443	2.50445	2.27243	1.65802	2.15928	1.48506	2.38822	2.8413	2.88979	1.62472	2.44903	1.25093	3.07739	1.83804	1.62244	3.11775	1.6728	2.96209	2.79221	1.75137	1.40325	2.64328	1.48258	1.91322	1.695	2.41794	1.91453	1.62352	2.32475	1.22993	2.57347	2.26361	3.00156	2.14243	2.93538	2.31669	3.13669	1.67974	1.68336	2.48678	2.99518	2.21896	2.5682
HERC2	1.89868	2.3322	2.19483	2.60193	2.88049	2.14454	2.5586	2.94625	2.59048	2.33128	1.88354	1.93321	2.84811	2.69127	2.58268	1.749	2.24486	1.77439	2.84601	2.76878	2.29563	3.19717	1.84683	2.54938	2.13623	1.42414	1.88495	2.66946	1.55219	1.85445	2.47257	2.35803	1.87242	1.91077	2.55031	1.38579	2.63018	2.27821	2.75983	2.22515	3.22937	2.5407	2.83236	2.46659	1.40351	2.15152	2.80129	2.25171	2.11405
HERC3	1.85955	1.83817	2.37384	1.96525	1.54179	1.80093	1.90039	1.98064	1.84108	1.98717	1.55419	1.52906	2.30805	2.53659	2.10506	1.85257	2.45335	1.89834	2.38229	2.07738	2.34462	2.33077	2.34673	2.26722	2.92707	1.6802	2.33116	2.16002	1.37317	2.18614	1.79578	2.65499	1.85424	1.99187	2.0277	1.16194	1.52671	2.04931	2.26106	2.03879	2.51584	2.03054	2.27818	1.19896	1.46724	2.279	2.0459	2.20069	2.24979
HERC4	1.41646	1.21319	1.78838	1.92794	2.34078	2.12144	1.51836	1.53293	1.7001	1.08385	1.16779	1.68007	1.3148	1.73505	1.86897	0.770411	2.08357	1.66163	1.48936	2.10308	1.67093	1.87237	1.23305	1.7591	2.20405	0.93098	1.65092	1.82247	1.87145	1.64262	1.71369	2.49545	2.46603	2.53429	1.91979	0.954992	1.66199	1.89541	1.5229	2.55251	2.0254	2.25579	1.56465	2.32561	1.77408	1.70948	1.82188	2.08915	1.93364
HERC5	1.20068	3.18377	1.21796	2.20812	1.10963	0.754245	0.447238	1.91352	3.03495	1.1408	1.42791	0.658171	1.23716	1.41408	1.89948	1.30256	2.33603	1.48525	1.78084	0.243596	0.21554	0.786782	0.717009	2.00387	1.79419	1.48015	1.36766	1.20216	0.230344	1.12494	0.492347	3.16475	1.65633	1.57748	1.0756	0.93834	1.0448	1.05359	1.78065	0.464479	1.56791	0.767206	2.00122	2.47958	1.03206	2.43348	0.813395	3.12694	3.03457
HERC6	2.48611	2.74906	1.714	2.47464	1.95193	1.73415	0.937256	3.25584	4.3349	2.94393	2.04437	1.80397	2.00449	2.65939	1.46943	2.59317	3.16966	2.57102	1.94392	1.49801	1.9559	1.80917	3.06803	1.68108	3.64778	2.1433	0.924916	2.19354	0.933951	4.01629	1.16826	3.5179	2.32255	2.47308	2.09125	2.08757	1.38345	2.0127	1.94857	1.32583	2.45683	1.70122	1.82632	2.67874	1.7321	2.70125	1.95226	4.49327	3.50569
HERPUD1	4.15864	4.18579	4.84883	4.38624	3.80456	3.79044	3.76722	4.02024	4.97739	3.93167	5.1596	4.0882	4.39398	5.12374	4.2692	4.87944	4.81411	4.7661	3.82997	3.8233	4.55391	4.64848	4.49314	3.50146	4.40008	5.56395	4.58034	3.9427	4.4002	4.48035	4.20504	4.16321	5.0075	4.14413	4.49247	3.78964	4.57863	4.8226	3.81011	3.67371	3.88731	5.11359	3.79619	3.36835	5.24334	3.97704	4.67699	5.28534	5.05244
HGS	3.6274	3.86529	3.74383	4.106	4.86492	4.13963	4.54711	3.40202	3.67709	4.0611	3.35962	3.15446	3.53577	4.19816	2.97136	3.92953	3.87222	3.23903	2.86473	4.11489	3.78943	3.63872	3.6242	2.63796	4.00157	2.8106	3.51928	3.27965	3.28276	3.64871	3.39652	4.19197	3.21194	4.14888	4.03129	2.95467	3.28511	2.90232	2.81656	3.3491	4.23872	3.82029	2.70671	3.26498	3.54357	3.03157	3.72262	3.49124	3.25834
HIF1A	5.0152	5.26694	5.63774	5.75404	4.85399	4.74063	5.00218	6.12739	5.07163	4.4855	4.70668	4.07151	4.91391	5.0816	5.56442	4.92526	5.55561	5.01104	4.45474	4.55147	5.46968	4.63726	6.15303	4.67647	4.61515	4.02878	5.45548	4.92034	4.86604	5.35637	5.76212	5.13733	5.79805	5.19806	5.68737	4.8155	7.3575	5.07436	4.53643	4.66006	4.64975	5.19111	4.53786	4.35148	5.73923	4.55856	7.53092	5.59749	6.26069
HLA-A	9.66154	9.17462	9.68005	7.41653	7.32088	6.7286	8.42665	8.00255	8.95847	8.57936	9.08075	8.92779	7.73616	7.86029	6.97929	8.64983	8.7205	8.96607	6.405	4.97474	5.97493	6.34872	6.01285	6.99869	8.67383	8.8066	8.03816	8.4543	9.26218	7.63486	7.47223	7.66105	7.50076	8.56875	9.12974	8.73149	6.92984	7.1939	6.71357	7.41909	8.04274	8.80705	6.20594	7.86979	9.20016	7.68991	8.01764	9.05953	9.37563
HLTF	1.59944	2.67273	3.33869	2.95344	4.83643	3.12104	3.05292	2.3733	2.77464	3.21829	1.3813	0.335605	3.31436	1.74544	2.66653	2.19904	1.8343	2.50414	2.99794	2.952	0.515915	3.35884	1.74164	3.25599	2.46237	1.33789	2.95176	2.46751	2.49372	2.54376	3.64545	2.86512	0.926952	2.68147	2.07488	1.93231	3.80997	3.07216	2.90914	1.62622	4.33795	4.08455	3.02841	2.96732	2.64389	2.74265	2.58736	2.38945	2.93576
HSP90B1	7.12792	7.98996	8.03513	7.90937	7.35146	7.30256	7.77395	6.7253	8.85234	7.63112	6.73636	7.84602	8.68264	7.18724	6.89398	6.76093	7.23691	8.60044	6.0336	6.96585	8.23172	7.65546	5.89666	5.94449	8.19477	7.06702	8.39784	6.79522	7.84822	6.70713	7.13499	6.54822	8.32789	7.56781	6.90063	7.32787	7.69708	8.28603	6.08884	7.50228	7.57488	8.1958	6.48067	7.68485	7.62825	6.06397	7.48506	7.53245	7.47344
HSPA5	7.33652	7.50779	7.50455	7.53881	8.18618	7.30729	7.22981	6.82816	8.61519	7.75089	6.74175	7.18324	7.87014	7.15855	6.92633	7.18997	7.32919	7.44907	5.63502	8.03809	7.5748	6.88562	6.34734	5.77715	8.47241	6.77257	7.60456	6.61704	7.0791	6.51991	7.37863	7.00186	8.12794	7.38842	7.5094	7.01526	7.49363	7.92481	5.48015	7.92036	6.62889	7.65468	5.7543	7.0041	7.50505	5.78327	7.00229	7.68556	7.42155
HUWE1	4.34214	5.48482	4.37682	4.73693	4.81249	4.48568	5.01225	4.77876	4.6734	4.61438	3.85578	3.26256	5.20545	4.72107	4.37896	4.07996	4.18879	4.05363	4.71039	4.32275	4.40523	5.11042	4.13041	4.57049	4.30166	3.61527	2.78058	4.82469	3.51308	4.24837	4.76114	4.78563	4.70599	4.25434	4.38999	3.30964	5.19502	4.7471	4.5371	4.61839	5.03533	4.52906	4.51557	2.84858	4.11754	4.65412	4.74115	4.28326	4.49689
IDE	3.17349	3.06921	3.92419	3.43541	3.86775	3.214	3.73225	3.72667	3.77703	3.07132	2.39095	1.91359	3.04358	3.68711	3.06574	1.93791	3.58876	2.88134	3.20678	3.37639	3.62227	4.15697	3.14141	3.32651	3.21126	2.31893	2.85421	3.24489	3.38566	2.81914	3.15592	3.11163	3.9718	2.89996	3.53506	2.31168	4.48582	3.74683	2.96182	3.52702	3.2064	4.29217	2.97108	2.91223	2.5056	3.1468	2.89369	3.52538	3.30295
IFIH1	3.48804	2.91037	2.91504	3.26544	1.76825	2.19021	2.28907	3.63252	4.86949	2.22887	2.16656	2.09463	2.72348	3.40599	1.94989	3.04034	3.65245	3.08929	2.27236	1.27996	2.04541	2.62751	1.92919	2.07231	3.38208	2.04377	3.01057	3.05793	2.23653	3.23387	3.26443	3.63995	2.44275	2.53166	3.27304	2.61699	1.9044	2.30612	1.95691	2.09127	2.88011	2.62517	2.0579	1.96877	2.85312	2.77803	1.98717	4.37761	4.78697
IKBKG	1.34799	1.37015	0.85217	1.36698	1.11897	1.99705	1.10677	1.15802	0.922882	1.24565	1.19337	0.436861	1.47821	1.27598	0.924698	1.45966	0.989427	0.926614	1.16111	1.76544	1.10356	1.58539	1.00404	1.17546	1.53518	1.00362	0.723928	1.32599	1.22403	0.861464	1.41422	1.71142	0.470785	1.77987	0.941048	0.920395	1.02063	0.550952	1.04778	0.944124	0.847772	0.876808	1.03437	1.072	1.15022	1.22576	1.04012	1.04401	1.05909
IL33	0.594031	3.10066	0.9089	2.11449	0.109322	1.96728	0.888326	3.22572	5.45229	0.677531	3.71305	0.37495	0.411571	3.05311	4.25397	1.41093	4.01014	0.406805	4.21524	3.82368	0.557946	1.54364	3.64715	4.15509	1.25949	2.68962	1.44293	3.44947	1.26546	3.71273	2.0448	4.01051	0.780397	2.64756	1.75238	2.15731	3.92688	1.6653	3.89192	1.72672	2.47865	2.46983	3.49121	3.59308	1.55516	3.50713	4.81228	2.45422	4.15636
INO80	2.74687	2.32106	3.25998	3.24672	3.21731	2.65332	3.18196	3.10992	3.50836	3.18783	2.61566	2.52371	3.42454	3.22011	2.7247	2.95142	3.04562	2.58902	2.7361	3.34474	3.01688	3.38275	2.34387	2.76562	2.28573	2.19876	2.56372	3.00785	2.41791	2.8158	2.73659	2.68081	3.19836	2.66028	3.41433	2.28877	2.84411	2.73653	2.59326	3.07669	3.60854	3.04179	2.58861	2.81766	2.61416	2.62355	3.17638	3.21708	2.92939
INO80B	1.68047	1.352	1.72006	1.48117	1.52407	1.66875	1.3151	1.49761	1.52598	1.69426	1.85302	1.65562	1.34801	1.33953	1.12251	2.56652	1.84241	1.21016	0.961922	1.56903	1.50708	1.06462	1.38018	0.81701	0.73596	1.98176	1.2645	1.54301	1.4807	1.85424	1.74584	1.24455	1.43725	2.14798	1.68421	3.11363	1.6284	1.30965	1.01083	1.25884	0.930378	1.11729	1.04563	2.14011	2.21586	1.64494	0.939196	1.80591	1.05194
INO80C	1.50797	1.21452	1.44129	1.46839	0.994285	1.80175	2.11747	1.25207	1.81756	2.24713	1.49102	1.84717	1.54515	1.76634	1.03925	2.47309	2.14137	1.71044	1.77117	1.67465	2.04227	1.12146	2.2372	0.994183	1.36988	1.88817	2.03497	1.4288	2.5363	2.0716	1.38553	1.10456	2.48661	1.88097	1.91083	1.69381	1.16617	1.43941	1.51775	1.67668	1.1899	2.43638	1.59873	2.89342	1.34082	1.04199	1.22451	1.79364	1.40703
INO80D	1.31795	1.32321	2.20374	2.2158	2.48459	1.60654	1.81785	2.17043	2.67385	1.42142	1.17786	1.65701	2.07359	2.24492	1.55572	1.65848	2.12761	1.4089	1.64266	1.82557	1.91449	3.11475	1.45954	1.72497	2.32334	1.20713	1.68876	1.81281	2.38297	1.83688	2.13495	2.11552	2.38956	1.96158	1.90517	1.24173	1.99732	2.76334	1.65712	1.91289	2.56729	2.26971	1.60358	1.75522	1.89355	1.62092	2.17616	1.8947	2.25907
INO80E	2.90581	3.35958	2.63408	2.51509	2.27988	2.32139	2.23597	1.94706	2.34361	2.65153	3.07486	2.91754	2.21549	2.70316	2.49334	3.13029	2.5001	2.25528	2.54112	2.92268	2.58214	2.88782	1.89866	2.10711	2.7868	2.52938	2.55852	2.68897	2.49908	2.5127	3.44673	3.19741	2.22977	2.69775	3.12588	2.78666	2.44634	2.21573	2.47944	2.81645	2.18485	2.45102	2.62995	2.95339	2.77259	2.21174	2.19178	2.86662	2.33445
ITCH	3.21557	2.95247	4.05252	3.52863	4.30272	3.72231	4.03655	3.79444	4.46478	3.35922	2.72745	2.46188	3.97594	3.6447	3.26457	2.70727	3.79834	3.02952	3.28091	3.39689	3.21979	4.64081	3.8237	3.31524	3.52574	2.48368	3.41133	3.39847	3.44298	3.43968	3.58444	3.84927	3.96217	3.37144	3.26187	2.78807	4.05644	4.77979	3.22089	3.71428	3.83323	4.00798	3.26868	3.43383	3.00074	3.38772	3.78368	3.2874	3.62719
JKAMP	2.95539	2.64629	3.60842	3.10577	2.82699	2.85918	3.1342	2.75805	3.14813	3.37183	2.90312	2.70942	3.25011	3.39627	2.89243	2.47195	3.33204	3.14047	2.72208	3.10452	3.84029	2.6968	2.89559	2.52418	3.4468	2.88931	3.462	3.24478	3.312	3.2919	3.25529	3.24714	4.08552	3.51409	3.52885	2.8282	4.18292	3.77098	2.8973	2.98247	3.01058	3.23949	2.45462	2.95222	4.04922	3.05425	3.22671	3.75702	4.01855
JOSD1	3.87195	3.40772	4.29014	4.55634	4.72074	3.82573	4.1692	4.40079	3.67578	3.67262	3.72887	3.2367	3.82767	4.4899	3.51329	3.57849	4.43913	3.11637	3.59188	4.09213	3.93636	4.04046	3.82501	3.2228	5.24428	3.22722	4.25191	3.90056	3.70593	3.79639	4.03518	4.38544	4.78555	3.79067	4.80068	3.16887	4.74269	4.57827	3.84534	4.75771	3.88217	4.56752	3.6644	3.56751	4.51124	3.35091	4.11073	4.14864	4.50627
JOSD2	5.06696	3.00329	2.74622	3.25452	2.93335	2.81518	2.77142	3.08588	3.27124	3.5046	3.714	2.99844	3.9775	3.49814	3.46806	3.68412	3.89061	4.71711	3.07128	3.38396	3.13129	2.89289	3.26038	2.59744	3.30225	4.2966	2.9128	3.56732	3.64863	3.82552	4.30914	4.212	2.21185	4.03374	3.52871	3.85568	3.09022	2.44887	2.88459	4.08694	2.93847	3.07347	2.87647	4.07066	3.79593	3.21267	3.03334	3.21318	3.26506
KAT2A	3.88298	3.69628	4.63259	4.1858	5.1061	4.61819	5.04184	3.64936	4.31756	5.08213	3.99779	4.33849	3.55662	3.85441	3.05732	3.72783	4.23841	3.78385	3.16053	4.75221	5.3042	4.24754	2.71718	2.65382	3.11067	2.36658	4.26573	3.66054	3.87634	3.91138	3.99284	3.72501	4.3645	3.6428	5.19167	3.38807	4.14651	3.6685	3.00134	3.81352	4.66909	4.35261	3.11788	5.61903	3.75094	2.76433	3.07506	3.92613	3.21327
KAT2B	1.93869	2.33703	1.99072	2.30636	1.09513	1.46141	1.36547	2.41068	1.51417	1.23057	1.97891	1.22238	2.40604	2.97861	2.99939	1.9961	2.6832	2.21993	4.0864	1.65492	2.20598	2.47039	3.48833	3.49823	1.51969	2.4003	2.27863	2.7283	1.79654	2.98842	2.8423	2.78461	2.21642	1.92628	2.10756	1.06765	2.12006	1.96622	3.95342	2.38856	2.1889	3.30733	3.88259	1.36459	2.53946	3.03068	2.29212	2.5606	2.6944
KBTBD13	0.0218132	0	0	0.0460944	0	0	0	0	0.0249725	0	0.0217614	0	0	0.0120331	0	0	0.0779308	0	0.0536249	0	0	0.0307541	0.0569559	0	0	0	0	0	0.0153542	0.047162	0.0105943	0.0140202	0	0.0858685	0	0	0.0141241	0.0483097	0.045521	0	0	0.011754	0	0.0777824	0	0.391674	0	0	0
KBTBD6	1.48063	1.78358	1.88465	2.03748	3.32313	3.40329	2.34966	2.27219	2.71529	2.05411	1.5716	2.46894	1.58494	1.77823	2.25004	2.03955	1.84266	1.89465	1.98701	2.30973	2.78982	4.0523	0.850521	1.77617	2.01865	1.05921	2.04065	1.73729	1.44135	1.67826	1.44097	1.51572	1.98962	1.91907	1.58342	2.27612	1.42064	2.06301	1.67651	1.01611	2.53226	1.98818	1.85872	1.94596	1.30688	2.09319	1.65291	2.48384	1.80464
KBTBD7	1.52552	1.89336	2.11605	2.18112	3.26683	3.15333	1.70945	2.06973	2.86492	1.74318	1.92537	1.47162	2.26297	1.99083	2.08973	1.99548	2.05947	2.53654	2.05706	2.49928	1.94002	4.24811	1.17204	1.79549	2.19733	1.85498	2.55469	1.95767	2.12782	1.93814	1.9178	1.44583	1.72786	2.3699	1.74963	2.33174	1.50446	2.18565	2.01091	1.2763	2.34474	1.86726	2.14618	2.14622	1.75636	2.01039	1.64174	2.8208	0.971383
KBTBD8	0.537851	0.628207	1.30074	1.49503	0.17603	0.50952	0.885275	0.478735	0.93068	0.450796	1.23941	0.467651	0.528789	1.14106	0.480224	0.176875	1.30129	1.18314	0.419709	0.87281	0.801503	0.889064	0.366029	0.664467	0.393435	0.83738	1.1664	0.856532	0.417898	0.45117	0.4617	0.656617	0.712399	0.227329	1.1532	0.245107	0.413392	0.705187	0.265364	0.91447	0.936933	0.912594	0.26172	1.48466	0.273334	0.775317	0.60421	1.0672	1.11901
KCTD6	1.67886	1.75349	2.01375	1.92699	1.21078	1.84615	2.0866	1.66629	1.51068	1.23741	1.39523	1.56985	0.984976	1.47215	1.70161	1.2366	1.61419	2.14021	1.9825	2.31424	2.02841	2.59067	1.95819	1.62334	1.11305	0.942534	2.10404	1.55245	1.53211	0.988681	1.23044	1.5306	2.45386	1.38308	1.65009	1.50471	2.56643	2.05788	1.72124	1.76233	1.33448	1.56413	1.80171	2.43756	2.11154	1.82872	1.43772	1.47873	1.70216
KCTD7	0.495082	0.963023	0.900255	1.33882	1.49256	1.2923	0.852659	1.5509	1.22202	0.54651	0.924508	0.556435	0.817246	1.11327	1.69992	0.91152	1.45582	0.489839	2.04779	1.10122	1.26838	1.34182	0.565816	1.8303	0.867178	0.721767	0.372566	1.90907	0.587184	0.774079	0.890883	1.46772	0.834961	0.937181	0.76211	0.436701	1.39816	3.4838	1.97907	0.359278	1.34726	0.744506	2.28575	0.694892	1.0949	1.6329	0.911666	1.13307	0.916204
KDM1B	3.20012	2.75482	4.83752	3.66355	3.58108	2.84572	3.88931	2.60271	4.4333	3.31074	2.62192	2.71939	3.37137	2.27133	2.24905	2.30998	3.20358	2.55309	2.6131	3.33011	3.99186	3.08079	2.3694	2.1761	2.71776	1.57222	3.87117	3.57894	2.88313	2.92455	2.4073	3.3285	3.46431	2.69407	3.63527	3.28864	3.08501	3.48472	2.47336	3.1131	3.4668	3.0731	2.56992	3.06245	2.83785	2.58602	2.24091	3.67247	3.69512
KEAP1	4.38746	4.49641	4.22023	4.07492	4.33562	3.76181	4.1522	4.1657	4.17156	5.14725	4.17877	4.04051	4.12087	4.66922	3.6552	4.18436	3.94272	2.98188	3.91433	4.01315	4.77652	6.1408	3.9337	3.01187	4.07859	3.58567	4.3748	4.02264	4.04894	3.53114	3.78367	4.92058	3.86681	4.68954	4.49392	3.99485	3.40982	3.25215	3.4863	3.91898	4.2821	3.99888	3.82302	3.68685	4.57912	3.51995	3.50554	3.81587	4.19668
KLHL11	1.38945	1.94892	1.95636	2.67592	2.69731	1.76237	2.52419	2.57501	2.39719	1.91915	0.760257	0.698262	1.81401	2.24229	1.54036	0.868228	2.03102	1.29365	2.07363	1.77503	2.1161	2.84429	1.30667	1.90389	1.6639	0.998922	1.70977	1.88585	1.60127	1.86024	1.69988	2.09521	2.07751	1.17344	1.56722	0.293164	2.28266	2.69236	1.85763	1.46937	2.52857	1.9182	1.80222	1.6282	1.68219	1.71705	1.94992	1.87658	1.84718
KLHL13	0.017233	1.44171	0.649443	1.63122	0.12655	1.03266	0.0481254	0.7853	0.528503	0.499543	1.0179	0.340738	1.03626	0.349556	1.31626	0.0559937	0.352032	2.44533	2.48094	0.371526	0.113494	1.74121	0.961687	1.17584	0.660115	0.285216	1.24405	0.921633	0.0241481	0.668803	0.130234	2.96126	0.596046	0.398216	0.945529	0.302459	0.51866	1.54952	1.83532	0.27443	1.4232	0.0923957	1.94956	1.97894	0.264901	1.32456	0.823494	0.435964	0.89941
KLHL2	1.7884	3.01712	1.67262	2.40884	2.03858	2.02501	1.766	2.33023	1.70084	2.01591	1.7882	1.62858	2.34889	2.50271	2.83342	2.32464	1.74581	1.47047	2.15741	2.36998	2.6511	1.7826	2.51025	2.57296	2.13677	1.43533	2.29114	2.31777	1.9717	2.23596	1.61857	2.09121	2.25753	2.03455	2.23018	1.97138	2.64504	2.20187	2.1038	1.65326	2.76926	2.1708	2.29062	2.12937	1.31957	2.09358	3.21057	2.47897	2.75505
KLHL20	1.95603	2.02478	2.14236	2.50324	2.3765	2.01818	2.2044	2.45954	2.59691	1.70971	2.10634	2.39343	2.50649	2.9014	2.92474	1.92929	2.51843	2.02636	2.69039	2.85302	2.3699	2.48081	1.81203	2.61642	2.60888	1.7637	2.38082	2.417	1.92277	2.18916	2.30698	2.70329	2.61685	2.76299	2.19485	2.13599	2.36799	2.66668	2.62628	2.37039	2.61591	2.19371	2.7513	2.30067	2.50419	2.52435	2.36619	2.83967	2.5651
KLHL21	2.16664	2.64439	2.15754	2.35008	3.08201	1.99262	3.04267	3.37891	3.57072	2.94417	2.43061	1.85488	2.71281	3.15867	3.40806	4.27603	3.15681	1.59146	3.84723	3.03481	2.88151	2.73317	3.87482	3.47303	3.51825	1.98552	2.01974	3.04589	1.6005	3.31586	2.82759	3.05671	3.43254	3.78291	2.74213	2.58444	2.83245	1.92148	3.91623	3.1025	3.92048	2.49127	3.65588	1.91341	1.88077	3.27997	2.87117	2.9738	3.33015
KLHL22	1.8911	2.82783	1.91872	2.1769	1.842	1.40261	1.39935	2.15928	1.59864	1.66142	2.53762	1.62084	2.25231	2.30728	2.53647	2.86266	2.41983	1.2853	2.99323	1.99917	2.5554	2.76248	1.73436	2.51731	1.85249	1.69251	1.65622	2.51286	1.29792	1.68528	1.99343	2.3936	2.00254	1.87039	1.9572	1.60674	2.37739	1.90115	2.74699	1.62117	2.21558	2.11966	2.90607	1.80099	2.53905	2.38125	2.33923	2.2098	2.05883
KLHL25	1.92098	3.01717	2.18412	1.93894	1.98106	1.59782	1.43737	2.13141	2.31757	2.34301	2.21808	1.80344	1.9762	2.22433	1.66436	1.8402	1.93312	1.83374	1.40433	1.89075	1.92811	2.7727	1.07456	1.80338	2.44416	1.22471	1.76382	1.82931	1.56624	1.24822	2.1827	1.86668	1.14415	1.45398	2.15143	1.93787	1.20781	1.27004	1.32903	2.80224	2.07211	3.02925	2.08462	1.24709	2.28371	1.57613	2.45895	2.10186	1.56094
KLHL3	0.101056	0.733444	0.0570359	0.638682	0.576731	0.316075	0.134106	0.634083	0.300088	0.0653737	0.43438	0.0479163	0.477763	0.584114	0.625106	0.114075	0.575316	0.765497	0.706636	0.673038	0.0258511	1.25191	0.344542	0.497275	0.301083	0.483024	0.0526592	0.856271	0.682835	0.673072	0.1765	0.669948	0.284292	0.941105	0.411697	0.303382	0.442386	1.23763	0.614709	0.166557	0.484768	0.447798	0.334221	1.35094	0.435917	0.506765	0.604155	0.322255	0.561758
KLHL41	0.02292	0.134003	0.0713251	0.177367	0.140946	0.102834	0.0322446	0.153155	0.209145	0.0193905	0.034164	0.0880261	0.0754323	0.17895	0.408071	0.0527323	0.25049	0.0958296	0.347109	0.105355	0.17571	0.154764	0.22566	1.17541	0.0375358	0	0.116495	0.818906	0.047874	0.232231	0.0602007	0.26939	0.0384352	0.114875	0.129233	0.285231	0.135197	0.237529	0.606231	0.261541	0.325573	0.0607319	0.698341	0.31338	0.0655556	0.552457	0.124995	0.212795	0.28646
KLHL42	1.4769	2.65937	2.18048	2.6164	2.57792	2.3437	1.87833	3.43982	2.70352	1.50449	2.08031	2.08226	2.02547	2.32259	4.40889	2.87299	2.14872	1.87178	4.49452	2.64875	2.55778	3.47364	1.95368	4.86983	1.89754	1.95398	2.49562	3.1431	2.41254	2.69491	1.92458	2.84543	2.31993	4.87694	2.07217	2.10882	2.90378	2.46029	4.17357	2.22488	2.63604	2.30627	4.68677	2.79796	2.29617	4.23086	2.95853	2.45591	3.06373
KLHL5	2.42978	2.75787	1.94962	3.51207	2.71877	2.78967	1.68399	3.39594	2.63058	1.2769	2.20181	1.08823	2.35496	2.58384	5.00072	2.01326	2.52654	2.38003	4.50057	1.37568	1.55283	3.00138	2.31546	5.63758	2.30463	1.89309	1.70227	3.88704	1.68823	2.71753	2.17375	3.14784	2.61249	3.10605	2.0869	1.5769	3.70932	3.34499	4.03211	2.23336	2.21436	2.38703	4.42338	2.35262	2.36425	4.64249	4.16122	3.33387	4.41907
KLHL9	2.54198	3.15366	3.55325	3.45542	0.307654	3.02211	2.95203	2.89914	3.1904	2.32951	2.2151	2.59	3.45436	3.44186	3.05192	1.79304	2.77382	2.28884	3.02908	3.20811	2.89597	2.80976	2.45076	2.99496	2.94458	2.25283	2.96724	3.24163	0.490675	2.62687	2.83073	3.16764	3.30262	1.77718	3.03394	1.4963	3.25164	2.65836	2.80445	2.71486	3.06925	3.01688	2.91009	2.74506	2.55115	3.01476	3.1979	3.88258	3.33531
LEO1	3.42824	2.9873	3.44732	3.71805	3.10421	3.55209	3.75133	3.28419	3.8582	3.83655	3.17856	3.72635	3.89646	3.82468	2.97874	3.10892	3.20529	3.2981	2.25585	3.55526	4.19693	4.23962	2.85813	2.71461	3.33197	2.50901	3.97424	3.42369	2.87273	4.28778	3.3789	3.15145	4.12789	3.50667	3.84043	3.07197	4.40681	3.76824	2.36516	4.04152	3.37494	3.8789	2.39692	3.63541	2.68038	2.47907	3.43494	3.44913	3.7817
LMO7	4.09109	2.54008	4.09851	3.06711	3.16283	5.18969	5.17045	3.30453	5.11532	3.09231	2.56006	2.67341	3.37291	2.90487	1.43081	2.82156	2.85995	3.16463	0.790393	3.10081	2.58882	1.96895	3.94954	1.50179	5.00115	2.93069	3.71659	3.0277	3.89948	4.38475	2.64453	2.73365	4.75952	3.38204	3.42698	2.59317	2.76273	3.83485	0.907373	4.72914	3.25522	4.08656	0.454411	3.50321	3.28343	1.99039	2.52347	4.18799	3.70912
LNPEP	1.90466	2.07672	1.94402	2.70144	2.43474	2.3719	2.21998	2.65617	2.87064	1.69437	2.2238	1.75279	2.6777	3.1161	3.37151	1.25679	3.19068	2.10138	3.61183	2.94452	2.80361	2.77217	2.43518	3.99695	2.20454	1.72621	2.38427	2.92575	2.72363	2.47872	1.89367	2.99029	2.47016	2.17194	2.77079	1.64738	2.52586	2.57024	3.50333	2.29544	2.67162	2.58708	4.10437	2.07079	1.84483	3.68772	2.59812	2.68946	2.50892
LNX1	1.44089	2.00403	2.50661	1.54001	1.44354	1.73613	0.94154	1.72469	1.59355	1.77452	1.5071	1.54233	2.57365	2.19846	0.654763	2.31888	1.29972	1.32089	1.09459	1.38366	1.11138	2.53705	2.82755	0.78514	1.55194	1.71802	1.81199	2.04571	1.79944	2.29291	1.50686	1.71297	0.957652	2.13161	1.99903	1.27463	0.687517	1.28294	0.828761	1.83271	1.58125	1.34966	0.683481	1.27572	1.17779	1.18611	1.60782	1.33766	0.627368
LONRF1	0.860373	1.4763	1.9368	2.17728	2.09964	1.91824	1.19965	2.3732	1.71255	1.60664	1.49306	2.29029	1.86579	2.14153	1.85672	0.954494	1.44937	1.88927	2.44023	1.84261	2.60333	2.01713	2.47124	1.95469	1.61501	0.627514	1.60618	1.92149	1.32821	2.02384	2.16791	1.99289	1.78972	1.24281	2.11127	0.97566	1.47512	2.20302	2.63698	1.50515	2.78659	1.87384	2.78842	1.91911	1.94733	2.09685	1.89726	1.34378	2.06478
LRR1	2.99332	2.36086	2.91578	2.58571	1.95886	2.20373	2.67315	1.88212	3.02854	2.43585	2.22429	2.79066	1.98912	2.55683	1.66264	2.00905	2.30582	3.1983	1.83953	3.40396	2.7798	3.05762	1.4621	1.69331	3.27286	1.74842	3.55208	2.01879	3.23845	2.21621	2.72375	2.45879	2.85543	1.65671	2.85811	2.57213	2.19825	2.56631	1.67604	2.46469	2.06198	2.42857	1.4457	2.83884	2.9967	2.295	1.82637	2.98566	2.64539
LRRC41	3.49156	3.46795	3.71095	3.85843	3.5081	3.21669	3.06631	3.33893	3.00045	3.53801	3.21869	2.93141	3.51008	3.43105	3.30876	3.64991	3.39843	3.76638	3.45861	3.77495	3.57761	3.90773	3.45827	2.9179	3.82341	2.56162	3.29902	3.5105	2.54929	2.83831	3.00474	3.38242	3.51355	2.99351	3.22785	2.96899	2.93383	3.41271	3.30078	3.57119	3.46908	3.43505	3.36329	2.66688	3.85219	3.21962	3.35131	3.20908	3.43949
LRSAM1	2.46906	2.90324	2.99556	3.38258	3.97529	3.42923	2.45425	3.61301	2.73065	3.0903	2.72769	2.85687	2.86329	3.02957	2.70963	3.44906	3.10417	1.53192	2.83441	3.30375	2.61996	2.64792	2.32603	2.76156	3.19431	1.95983	2.54664	3.00905	2.55765	2.46419	3.37211	3.20222	1.98165	2.87796	3.07465	2.59734	2.37137	2.69648	3.12475	2.47482	2.87117	2.89706	3.30296	3.18072	2.10601	2.92461	2.64414	3.18849	2.24951
LTN1	1.82308	1.96557	2.4692	3.17476	2.76135	3.02276	2.57054	2.42855	2.62138	1.30091	1.70433	1.41616	2.78143	2.42242	2.58525	1.69349	2.54416	2.26642	2.47786	2.65319	1.3828	2.84373	2.15869	2.52777	2.78775	1.8459	1.76494	2.41885	2.21418	2.3011	2.45357	1.92127	2.32214	1.97465	1.74801	1.47746	2.41	2.70967	2.37453	2.31526	2.34545	2.27397	2.58896	2.8188	2.32961	2.59721	2.66177	2.16645	2.01207
MAN1A1	4.47845	6.29384	4.52568	4.87371	5.46448	3.78727	4.54158	4.7319	3.20796	2.89692	3.9024	2.63912	4.27111	4.45375	4.97317	4.07696	3.56253	4.25485	4.49699	3.51947	3.64284	5.06316	3.08399	4.94971	2.07278	3.52842	3.79933	4.40687	2.94424	3.65422	4.11746	4.33607	3.09854	3.81549	3.36322	3.34023	4.80832	4.87661	4.40447	3.45815	4.95844	3.26001	4.58587	2.7658	3.01574	4.27043	5.13004	3.93037	5.3858
MAN1B1	2.83166	3.66622	2.63393	2.94195	3.76582	3.86242	2.48377	2.81228	2.61447	3.12351	2.70853	2.05318	2.77123	3.06076	2.52458	4.05856	3.06939	1.82631	1.85953	2.66693	3.06383	2.26299	2.58834	1.84613	3.4029	2.32927	2.65788	2.67671	1.97921	2.50719	2.96733	3.30391	2.79922	2.83705	2.95431	2.96183	3.67925	2.80927	2.08495	2.37931	2.94022	2.93185	1.98673	2.38007	2.40552	2.12532	3.07043	2.77215	2.83433
MAP3K1	2.56119	1.96252	2.67462	3.58342	3.57076	3.21797	3.42531	2.97448	3.31501	1.89797	2.72325	1.34724	2.90532	3.27698	1.79181	2.04785	3.42215	2.63479	1.4382	2.12618	2.56698	2.91943	2.3248	1.69521	2.8687	1.83898	2.07651	2.79414	2.27384	3.25931	2.0105	2.20398	2.60218	2.18011	1.97814	1.73304	2.37501	3.09211	1.46968	1.69957	3.51753	2.66423	1.30336	2.009	2.25054	2.63583	1.98503	3.14747	2.75514
MAP3K7	2.19597	2.09022	2.88921	3.23874	3.73268	2.99015	2.45417	2.97205	2.79217	2.1179	2.0763	2.3493	2.93275	2.85976	2.70934	1.45351	2.58229	2.25588	2.62609	2.96005	2.74604	2.9999	2.27542	2.82066	2.3083	1.80879	2.55814	2.10544	2.30234	2.41948	2.40295	2.31344	3.11748	2.86885	2.6823	2.29733	3.25856	3.38111	2.49566	2.38084	3.79489	2.79626	2.54212	2.43986	1.97543	2.73841	2.8409	2.38285	3.16786
MAT2B	3.93253	2.90871	4.63734	3.5072	3.01464	3.17829	2.89663	3.13192	3.94844	3.83295	4.18294	4.10567	3.64925	4.96179	3.22451	2.66108	3.84655	3.57791	3.18035	3.88402	3.94756	2.72732	3.04424	3.06257	3.09515	3.71167	4.64946	3.60805	4.4234	3.51637	3.8214	3.56115	4.09642	3.68955	4.38967	2.96684	3.8337	3.94218	2.8923	3.53443	3.67342	3.81525	3.09006	3.45706	4.35274	3.42826	3.42355	3.35505	4.29433
MAVS	3.64432	4.09932	4.18897	3.79139	5.79561	4.33524	4.11874	4.77146	5.53372	4.28149	4.11891	3.29444	4.55006	4.15846	4.24006	4.21023	4.58931	3.96792	4.0717	4.66196	3.82587	5.89456	3.70406	3.58736	4.10376	3.49555	3.39692	4.78249	4.19529	3.73711	4.2558	3.56017	3.39123	4.34983	3.96185	3.82626	3.30405	4.6043	4.11779	4.3411	4.41188	3.67478	3.98528	4.75307	4.05114	4.21931	4.34663	4.28046	2.91427
MBD5	1.00826	1.20354	1.22689	1.41495	1.47685	0.951804	0.920107	1.3614	1.21781	1.04589	0.836703	0.772297	1.58275	1.33135	1.54156	0.844088	1.20956	1.04274	1.91728	0.730515	1.13482	1.7912	1.21014	1.95521	1.02643	0.717559	0.814737	1.6007	0.943273	1.22003	0.959069	1.26797	1.16799	1.23829	1.04244	0.896654	1.33758	1.81918	2.10162	1.01578	1.57532	1.28099	2.23478	0.812683	1.23342	1.58961	1.58587	1.30381	1.31842
MBD6	4.18257	4.54324	4.11256	4.29121	4.31024	4.5285	3.82724	5.25017	4.12534	4.29937	3.74922	2.9701	5.16587	3.90638	3.17885	4.2834	3.93623	3.8628	3.34948	4.21072	3.39398	4.23009	3.84266	3.24212	3.94457	3.41753	3.99981	3.89307	4.46754	4.00379	4.16961	4.53885	3.64873	4.17706	3.59823	3.48968	3.55922	4.00465	3.47295	4.65121	3.82351	4.37254	3.46618	4.25815	3.44173	3.41193	4.02856	4.23821	3.40675
MCRS1	4.34181	3.98291	4.18509	4.26629	3.69009	4.13473	4.14212	3.76691	3.97425	4.63662	4.3517	3.70255	4.27106	4.28757	3.47417	4.26269	3.94557	4.0041	3.26911	4.36009	4.1029	4.20683	3.03919	2.95977	3.51644	3.91821	4.4239	3.5844	4.81137	3.69844	3.39661	4.05975	3.65581	3.94657	4.39829	4.11084	3.52839	3.91786	3.28405	4.11251	4.14678	4.88791	3.21187	4.10119	3.53889	3.29322	3.65647	3.78509	4.0064
MDM2	2.81992	1.94003	2.79545	3.22683	2.02761	2.2215	5.13097	2.47125	2.82245	2.40279	2.15632	2.69448	2.87784	2.9158	2.3226	1.75636	2.32331	3.02583	2.2916	3.38438	2.88142	3.54488	2.4301	2.31764	2.53365	1.81138	3.40432	2.95312	3.2656	2.48604	1.96923	2.29203	3.59296	2.14559	2.91164	1.34787	6.13743	3.22429	2.21357	2.63755	2.68775	3.96292	2.27071	2.32243	3.10623	3.26156	3.31229	3.69183	3.13864
MDM4	1.47604	1.29836	2.32678	2.73932	2.4457	2.72626	2.21555	2.54418	3.40037	1.61256	2.10384	2.32478	2.86596	2.52863	2.68652	1.36496	2.6994	2.40674	2.65518	2.80919	2.00057	3.12372	1.56452	2.52607	2.43547	1.43551	2.45545	2.46447	2.26939	2.45991	2.47176	1.83994	2.72429	2.44174	2.46638	1.43248	2.42197	3.17759	2.76091	1.64092	3.11683	2.56237	2.71973	3.12765	2.46061	2.71996	2.86376	3.03419	1.94484
MEX3C	1.72833	2.06405	2.93962	3.15577	3.09759	3.19903	2.2108	3.18238	3.30026	2.62641	2.53408	2.47658	2.37727	2.94949	2.40222	1.01528	3.09632	0.5163	2.1365	2.91334	2.65591	1.93497	2.24282	1.95387	1.707	1.56384	2.60596	2.53374	0.414497	2.29528	1.8225	2.55365	3.47232	2.90541	3.48985	2.30674	2.63751	2.39108	2.09051	2.28391	2.4274	2.62862	2.15548	1.93394	1.97806	2.16638	2.41463	2.6011	2.96972
MGRN1	3.8561	4.47401	3.51969	4.00784	3.68867	3.78177	3.79588	3.57204	3.9676	3.73317	3.42382	3.06272	4.26732	3.79102	3.34769	3.61301	4.35844	3.64479	3.42488	3.8709	3.31244	4.52208	2.90001	3.26729	3.59481	2.77927	3.35011	3.73499	3.25217	3.12575	3.88965	4.10222	2.94564	3.49479	4.06177	2.88031	3.45607	2.55035	3.35525	4.51131	4.11571	4.03091	3.31286	3.20566	3.01998	3.48006	3.78331	3.9144	2.99115
MIB2	2.00969	2.28871	2.90323	2.46459	2.54019	2.90984	1.76032	2.73633	2.94891	4.11291	2.80712	4.37318	1.78839	3.27792	2.43258	3.0202	2.41368	1.15062	2.2537	2.68818	3.70441	2.92486	2.40738	1.76669	2.48824	1.53598	3.31017	2.42286	1.93038	3.9991	2.31111	2.13766	2.30555	4.22402	3.64074	4.01805	1.37556	1.16864	2.22304	3.47532	3.69547	3.03752	2.32436	2.66893	1.52305	2.01614	2.66522	1.95659	2.27783
MID1	1.80577	2.61385	3.46205	2.54916	2.28702	1.44408	2.24915	2.85268	2.61694	1.8832	1.718	2.01349	2.10193	2.56615	2.6346	2.72437	1.75456	1.80535	2.03515	2.88076	3.17071	2.52465	2.10398	3.14515	3.12448	1.23117	2.55004	3.12425	1.53552	1.90573	2.32244	3.06389	2.2788	0.737349	2.2882	1.53824	2.77831	2.51733	1.89941	1.71706	2.29595	2.28057	2.28677	1.55151	1.95005	3.12144	1.62781	2.10501	2.42539
MKRN1	3.73446	3.17886	4.56912	4.00694	4.71306	3.9003	3.90588	3.6344	3.90078	4.54161	4.14063	4.49429	4.05872	4.6767	3.82062	3.92975	3.95241	3.7025	3.70511	5.00045	4.25186	4.21974	3.2565	3.48218	3.8251	3.78235	4.01457	4.32609	3.88036	3.71067	3.47258	4.64321	3.80103	3.64107	4.19127	3.28079	3.83656	3.51933	3.65678	3.99268	3.93271	4.32231	3.66091	3.78225	3.83074	4.01536	3.78032	3.55662	3.98657
MUL1	4.2623	4.2393	3.98763	3.52829	3.74356	3.18045	3.82855	3.3481	3.85362	4.08955	3.79987	2.85879	3.45326	4.15099	3.85631	4.47747	3.94603	2.75462	3.54599	3.77045	4.12121	3.50539	3.50539	3.4609	3.47843	3.65128	3.47755	3.90705	3.06048	3.66382	3.59573	4.02487	3.37661	4.00606	3.75299	3.27245	4.08443	3.74681	3.53501	3.17719	3.60278	3.55764	3.87153	2.84906	3.62728	3.56411	3.51251	3.04096	4.04362
MYC	5.87731	3.67813	6.77429	5.16646	6.06829	5.50005	7.01166	6.95519	5.91872	6.70731	5.56562	5.29919	3.82502	5.53135	4.83376	5.5946	4.90449	5.11372	5.29338	6.6383	5.80728	3.94896	6.516	4.29825	4.83659	3.76832	5.80704	5.21841	5.87893	5.43162	4.97161	6.83592	6.6344	4.86211	6.11907	5.76181	4.82926	5.44501	6.70642	5.50415	5.44226	5.62587	5.26305	6.03662	5.04497	4.50388	4.92525	5.48394	5.83983
MYLIP	3.59129	3.40779	3.48101	3.32916	4.71095	3.16725	2.31275	3.45449	3.77769	3.20341	3.96671	2.26318	3.64181	3.0866	4.22822	4.08826	3.73303	2.98218	3.83521	3.00828	2.98427	3.86904	2.42149	2.82403	2.35653	2.76292	2.27265	3.79497	3.57884	3.05608	2.98855	3.69668	2.09458	3.8328	2.30965	3.15695	3.81126	4.02546	3.58759	2.2174	3.40903	2.54398	3.31804	3.27948	3.51276	4.08764	2.64009	3.23053	3.53042
MYSM1	1.68194	0.994872	2.80161	2.5118	2.5724	2.24988	2.29784	2.19655	2.39272	1.70613	1.34521	2.5013	2.6191	2.61873	2.16618	1.83146	2.40396	1.63767	2.32034	2.46735	2.56989	2.04563	1.97083	2.78895	2.37908	1.23338	2.336	2.02577	1.61997	2.55177	2.21637	1.89008	2.78455	2.16857	2.52682	0.886791	2.61138	3.20599	2.3861	2.38132	3.37991	2.74478	2.32041	2.54146	1.6512	2.39865	2.73958	2.71827	2.04321
NCCRP1	0.682147	0.174951	0.0382288	0.429275	3.81582	0.0931853	0.163178	0.137813	0.0933615	0.0632374	1.63482	0.146845	0.506021	0.203639	0.420562	0.714606	1.73046	2.51611	0.286517	0.126954	0.293647	1.62523	8.45011	0.473239	0.00837088	0.268165	0.2056	0.202955	1.26771	6.01385	0.387208	0.122179	0.301537	0.166047	0.0392565	0.136894	2.03893	0.699782	0.576232	0.447381	0.135701	0.22052	0.0494184	1.24819	0.52394	0.322561	0.119793	0.729324	0.079033
NEDD4	1.10945	1.1689	1.26643	2.64805	1.76365	2.16504	1.97844	3.22255	1.87553	0.840853	0.997206	0.383116	1.91296	1.76552	2.23766	1.34605	1.30466	1.71428	2.84845	1.59893	1.90712	2.0685	1.00559	2.60713	2.01181	0.684392	1.19042	2.18132	0.751432	1.54172	0.744137	2.13113	1.36219	1.69533	1.88186	0.892089	2.62399	2.82632	2.45466	0.812651	1.60684	1.78527	2.24121	2.01769	0.784921	2.22622	3.11637	1.48957	2.27179
NEDD4L	2.36058	2.56944	2.26719	3.40452	2.69879	2.50861	2.7794	2.90386	3.00005	3.27097	1.76904	1.42062	3.09116	2.54334	1.2336	2.36308	3.22868	2.81866	2.59942	1.77726	2.72914	2.46786	2.24356	2.18627	1.47068	2.83445	1.8753	2.58848	2.14169	2.76658	2.18417	2.74541	2.99113	2.56281	1.74845	2.55768	2.72402	3.07407	1.6796	2.66138	2.93812	3.20071	2.20554	2.32965	1.54181	1.98385	2.50675	3.1973	2.08718
NEDD8	4.40595	3.95569	3.80889	3.41439	3.66243	3.66465	3.30633	2.7499	3.38446	3.6319	3.99842	4.13354	3.22015	3.46281	3.17557	3.73924	3.12084	3.99058	3.44371	3.84223	3.47034	3.13336	3.2538	2.72273	2.91115	3.96512	3.55064	3.4306	3.96526	4.04444	3.12407	3.61991	4.03727	3.6843	3.70413	5.09724	4.59257	3.92712	3.1946	3.5771	3.22422	3.42882	3.10723	3.68161	2.92484	3.08667	3.01874	3.58265	4.21438
NFE2L2	4.88284	4.0481	4.71076	4.29631	5.33794	3.69478	4.53452	4.69272	4.88187	4.49678	4.16576	4.38442	4.92353	4.91752	4.56329	4.5056	4.65192	4.56041	4.52548	4.68953	4.94667	4.89076	5.40345	4.10055	4.33787	5.39483	4.68627	4.88858	5.0716	5.51612	5.31459	4.12232	5.08809	5.92347	4.74883	4.21133	5.24673	4.49531	4.6161	4.40783	3.94097	4.94775	4.41835	3.66903	5.06642	4.57788	5.08449	4.69507	4.83449
NFKBIA	5.71605	4.83418	5.07735	5.83773	4.70424	5.07858	4.73556	5.46334	4.82326	5.38157	6.3005	4.88021	6.31118	5.70375	5.38967	6.74823	5.64279	4.87246	6.14028	4.86731	4.68801	3.67058	6.22723	5.11814	5.02598	5.78421	5.57446	5.15279	5.07234	5.4758	5.21157	6.25327	4.81043	5.56959	6.79504	5.25918	6.20721	5.05493	6.66854	5.40215	5.04829	5.61811	5.90139	5.51824	6.00835	5.54949	7.07276	6.54989	6.83551
NFRKB	2.75177	2.44258	2.71296	3.13832	3.38696	3.37464	3.20166	2.95306	3.2792	2.90203	2.49015	2.22822	3.57557	3.26936	2.50095	1.96714	2.5417	2.18002	2.49494	2.87312	3.6076	3.30342	2.23432	2.43027	3.55289	1.5072	2.61131	2.7507	2.20824	2.59323	2.66478	3.08951	3.04483	2.73379	3.20927	2.04827	2.98434	3.93479	2.61165	3.06839	3.30857	3.38285	2.54867	2.3189	1.52709	2.29463	2.60261	2.28469	2.72242
NHLRC1	0.398186	1.15751	0.078454	1.60627	1.90625	1.28936	0.247225	1.71211	2.9062	1.33452	0.769471	0.0283169	3.35977	0.697168	0.909517	1.61	0.629316	1.69525	1.23922	1.44703	0.0842483	1.96696	0.738988	1.28975	0.866743	0.780746	1.25762	1.96527	0.739586	1.38831	1.10082	1.70656	0.103571	1.91542	1.88683	1.51253	0.682012	2.01876	1.31396	0.842525	2.05411	0.1677	1.04524	1.10818	0.882035	1.46052	0.473115	1.76966	0.312898
NLRP3	0.713204	1.20668	0.467192	1.03081	0.13343	0.361586	0.29535	0.67673	0.543402	0.20977	1.01168	0.116569	0.370662	1.15653	0.698607	0.822842	1.02309	0.122026	0.41415	0.187876	0.163684	0.258773	0.420117	0.603213	0.0978393	0.191014	0.198669	0.848655	0.160524	0.230381	0.326409	0.881572	0.764606	0.446414	0.39552	0.257796	1.41467	0.699807	0.740876	0.348996	0.817854	0.57319	0.717914	1.08573	0.285765	0.681894	2.99912	1.14701	1.57364
NOD1	1.43842	1.37596	1.51275	1.85941	2.1461	1.57234	1.26701	2.28082	1.77033	1.37332	1.62317	1.15093	1.58055	1.87188	2.34138	1.54772	1.87355	0.81017	2.17705	1.6358	1.32377	2.6141	1.27992	1.24685	0.921808	0.520517	0.904809	1.95135	0.730222	1.20266	1.07021	2.35138	0.883881	1.59204	1.61261	1.04649	1.83608	1.51765	1.84268	0.888167	2.39092	1.5707	1.88102	2.04672	1.08079	1.71445	2.04179	1.83054	1.72247
NOD2	0.59554	1.24469	0.58629	1.26472	1.55936	0.598753	0.242323	0.935205	0.474119	0.115404	0.635536	0.254087	0.271292	0.935917	0.441512	1.25118	0.649404	0.719912	0.229464	0.503177	0.0657323	0.207736	2.96447	0.420052	0.140313	0.442915	0.190774	0.46145	0.431523	1.43078	0.326885	0.585659	0.59826	0.505717	0.67208	0.228099	0.958213	0.762346	0.308129	0.186596	0.485998	0.52709	0.228864	0.852167	0.829517	0.706977	0.87167	0.916535	1.46994
NPEPPS	2.85966	2.9386	3.30704	3.14962	3.77089	3.17261	3.79394	2.84892	3.10482	2.44441	2.63442	2.91876	2.75478	2.9447	3.34216	2.11831	3.03948	2.93786	2.83404	3.67953	2.92339	2.81027	3.25619	2.8038	3.51735	2.15784	3.21506	3.13928	2.85509	3.51602	2.82543	2.83347	3.26113	2.8418	3.13438	2.18502	3.30188	3.81733	2.87445	2.74085	3.38087	3.20798	3.02784	3.1378	3.20576	2.84933	2.89978	2.77825	3.1003
NPLOC4	3.53751	3.67966	3.49178	3.79154	4.9583	4.02895	3.96477	3.42546	3.62184	3.63951	3.23407	2.50948	3.76162	4.01525	3.51696	3.91579	3.99944	3.57123	3.38642	3.54602	3.31289	3.59233	3.69641	3.27777	3.95141	2.82892	3.26865	3.50285	2.96411	3.54386	3.39949	4.17345	3.37237	4.02766	3.76678	2.56844	4.04599	3.44754	3.20123	3.62656	4.32175	3.67501	3.22446	3.23837	3.35956	3.49617	4.16306	3.94467	3.70421
OGT	2.93732	2.74091	4.90048	3.8256	5.83626	4.26718	4.15347	3.79061	4.33696	3.34138	2.87809	4.11393	3.68829	3.96846	3.74928	3.01629	3.86095	3.59342	3.55126	3.74766	3.75231	4.01349	2.70097	3.73927	5.28243	2.28419	3.72666	4.52304	3.10499	3.67582	4.2432	3.53203	4.77823	3.38338	4.49206	2.28793	4.81977	4.39427	3.41922	3.25965	5.38852	4.43621	3.31958	4.87868	2.92777	4.34418	4.45885	4.51525	3.52725
OS9	5.27619	5.70972	5.1902	5.0891	5.00705	5.24476	5.59351	5.7216	5.0947	5.5232	5.12432	3.9853	6.09971	5.58385	4.71578	5.68995	5.02553	4.78234	3.8531	4.79301	5.07499	5.36943	4.4458	3.84824	5.21449	4.83894	4.76068	4.92099	5.48298	4.4453	4.71985	5.05169	4.54183	5.16406	4.97438	5.03352	5.26754	5.22044	4.21347	5.04474	5.09431	5.6929	4.0675	4.433	4.21411	4.03317	5.38646	4.9744	5.04527
OTUB1	5.37441	4.91773	4.96095	4.84078	4.42058	4.754	5.013	4.21194	4.57079	5.68045	4.80469	4.54943	3.59984	4.50355	3.56687	4.97301	4.6843	5.49473	3.90477	4.37022	4.89392	5.08731	4.9476	3.44235	4.48198	4.60173	4.74193	4.32426	4.77037	4.87783	4.60692	4.86175	4.39853	5.12202	4.9412	4.66822	4.41229	5.05886	3.83255	4.38795	4.16526	4.96741	3.76931	4.11636	5.34251	4.20347	3.84656	4.34947	4.64972
OTUB2	0.684231	1.0946	1.45553	1.90059	1.41915	1.19351	1.36386	1.27131	1.84842	1.40419	0.323102	0.646061	0.916094	1.41584	0.410103	1.0473	0.925032	1.03793	0.394814	1.00822	2.07783	0.327322	1.8651	0.239518	1.36636	0.63138	1.42097	0.666073	0.505148	1.87956	0.806933	0.845553	0.989655	0.391869	1.03267	0.519609	1.65854	0.57425	0.28452	0.346175	1.18034	1.02751	0.317148	1.39642	1.72297	0.256112	0.778774	1.03181	0.937072
OTUD3	0.535564	0.834998	2.10976	1.11726	1.54622	1.71566	1.54853	1.49932	1.56446	0.906814	1.02137	1.73918	0.895013	1.74281	1.67269	1.46762	1.64177	1.0369	1.856	2.524	2.2727	1.63231	0.644007	1.68534	1.55953	0.523935	1.63706	1.64023	1.30302	1.23827	1.4132	0.850245	1.86477	1.96696	2.36185	0.921429	2.34936	2.04927	1.61207	1.10845	1.92608	1.93039	1.8326	2.46175	0.701292	1.54777	1.48378	1.06504	0.959803
OTUD5	4.2251	5.12586	4.20687	4.59441	4.13431	3.84368	4.46958	4.40493	4.1514	4.0982	4.43618	3.73106	4.56817	4.4908	4.24178	4.255	3.98655	3.67243	4.36784	4.31792	3.92983	4.78077	3.97846	4.03568	3.99158	3.80463	3.76612	4.70481	3.62205	3.86084	4.48179	5.11187	3.94308	4.15647	4.33138	3.64849	4.45693	4.112	4.24939	4.19732	4.46536	4.14767	4.27485	3.37166	4.2828	4.37234	4.31987	4.08151	4.05958
OTUD7A	0.0720837	0.309916	0.173594	0.261362	0.439875	0.0556021	0.0783135	0.554565	0.187018	0.0932792	0.174418	0.355397	0.0604919	0.366156	0.432601	0.0577423	0.263021	0.0180018	0.628358	0.150102	0.207314	0.385593	0.212429	0.614079	0.126393	0.125452	0.0261025	0.225121	0.0395006	0.119303	0.147496	0.257216	0.0997294	0.174783	0.0683849	0.0958444	0.433715	0.191291	0.616223	0.156011	0.399931	0.0922435	0.398619	0.405643	0.0639552	0.421045	0.334635	0.139726	0.192178
OTUD7B	1.84648	1.61454	1.57808	2.48042	2.19777	2.31902	2.06406	2.43368	2.90573	1.79264	1.36609	1.65908	2.32259	2.41139	2.71493	2.09942	2.51914	1.85749	2.45663	2.39016	1.72622	2.90534	1.78081	2.13682	2.92988	1.65847	2.16598	2.19725	1.88727	1.88237	2.15911	2.00212	1.74845	2.69037	1.77806	1.56023	2.33965	2.14429	2.3155	2.56286	2.34996	1.76734	2.42744	3.11662	2.16412	2.30598	1.73656	2.43139	1.71932
OTULIN	2.09857	2.11882	1.99211	2.18583	2.50079	2.27821	1.9702	1.5571	2.10918	1.6696	1.6125	1.39692	2.45906	2.35872	1.64158	2.15065	2.32874	1.41746	1.12863	2.07665	1.86617	2.73416	1.33663	1.34679	1.94942	0.870809	1.67509	1.63238	2.1252	1.75013	1.80597	1.94739	2.11777	1.29989	2.19744	1.27078	2.42252	2.19935	1.19833	1.74003	1.88558	1.98288	1.21183	1.75915	1.65499	1.49861	2.27457	1.89808	2.20061
PAF1	4.93266	4.88466	3.84229	4.17501	3.79552	3.7954	3.89668	3.76874	3.72854	4.51381	4.43548	4.08986	4.40193	3.97207	4.09432	4.41907	4.26069	4.53164	4.13056	4.22784	4.17554	4.05663	3.97021	3.86631	4.04296	4.18966	3.76984	3.85465	3.99237	4.10064	4.29738	4.85184	3.82213	4.52683	4.39024	4.08858	4.55484	4.10862	4.1202	4.06563	3.31255	4.15516	4.31053	4.03483	3.62549	3.70724	3.9603	4.12859	4.04731
PCNA	7.47858	6.40369	7.59321	6.26809	7.50826	6.62356	7.97363	6.01073	7.47384	7.62177	6.39355	7.14029	5.97795	6.43148	4.50106	6.89498	6.84507	6.77769	4.17213	7.14901	7.35038	8.22122	5.09526	3.96029	6.84223	5.30883	7.25027	5.6926	7.53848	6.05012	6.50215	6.52647	6.50203	5.96597	7.12027	6.81412	6.4371	6.74076	3.87807	6.70627	7.07605	7.11154	4.09886	6.94065	7.07285	5.90534	5.36616	6.42357	6.44571
PEX10	2.33866	2.38838	2.26585	1.98891	2.53233	1.92353	2.17144	2.12413	1.99936	2.20381	2.1419	1.65693	1.68716	2.31743	1.62593	3.46065	2.3926	2.73479	1.75153	2.64725	2.21819	3.01549	2.50665	1.69124	1.44167	1.66372	2.09948	2.02693	2.15602	2.6804	1.84836	2.12461	2.08059	2.64758	2.62686	2.17456	1.97913	1.31806	1.79644	1.93261	2.51592	1.82815	1.93118	2.05913	2.39535	1.81914	1.50548	1.39765	2.12706
PEX12	1.53195	1.80562	1.61823	2.51182	1.9249	1.6566	2.36311	1.87556	1.91739	1.90961	1.67558	1.21221	2.3282	1.87048	1.7794	1.6954	1.68881	1.65964	1.97394	1.9143	2.21395	1.91609	1.27192	1.94183	0.874042	1.31658	1.84382	1.89954	1.18722	2.04222	1.72035	1.53079	1.82395	1.71237	1.54193	1.40685	2.08366	1.9779	1.53491	1.42768	1.8279	1.58314	1.91173	1.9459	1.80635	2.10912	1.38491	1.66495	1.86297
PEX13	2.57244	1.8756	2.95324	3.14063	2.21539	3.46254	2.69896	3.08882	3.08013	2.73675	2.05612	2.83634	3.02058	2.94109	2.5763	2.4887	2.51115	3.01567	2.71858	3.13155	3.24117	3.13028	2.90124	2.43089	2.53188	2.1947	3.33015	2.99167	2.53888	2.73212	3.27539	2.9083	2.63033	3.02001	2.91518	2.87193	3.91161	2.78445	2.50475	3.70835	2.27764	2.81952	2.54697	2.76358	3.72651	2.89423	2.47868	2.54258	2.65222
PEX14	3.45236	3.29674	3.03095	2.54505	3.05047	2.87166	3.07033	2.66531	2.65219	3.83304	3.38795	3.16299	3.95189	3.1591	2.50861	4.27475	2.83664	2.26857	2.53885	3.15967	3.43266	2.89798	3.20191	2.10027	3.69169	2.66367	3.01698	2.52322	2.37745	2.86683	2.8243	3.12993	2.57673	3.6887	3.41473	3.43625	3.019	2.89225	2.45558	3.22497	3.27896	3.1572	2.64058	3.18436	2.44168	2.39757	2.54663	2.24382	2.83953
PEX2	2.69785	2.68631	3.21558	2.57175	3.39346	3.74417	2.88976	2.80066	3.659	3.65422	3.21743	3.22572	3.32527	3.34631	3.11825	2.97338	2.72301	2.5341	2.73019	2.82545	3.64033	3.15515	2.34603	2.81788	2.81582	2.72284	4.12683	2.91439	3.09225	2.99643	2.27192	2.5463	3.67664	2.62783	3.26309	2.28775	3.47404	4.10033	2.71129	2.95272	2.92518	3.25532	2.82148	3.47592	3.17499	2.9552	2.60333	2.6642	3.60173
PEX5	2.18259	2.28278	2.87658	3.11075	3.41242	3.78023	3.29785	3.54141	2.98705	3.18904	2.68403	2.41805	2.83232	2.74131	2.85117	3.2341	2.93411	2.34491	2.67883	3.40182	3.76668	3.94301	2.32613	2.40877	2.22806	1.47683	3.14143	3.04329	3.26004	2.43805	2.50887	2.42986	2.53399	2.22441	3.03876	2.1219	2.6811	2.98979	2.69242	2.5789	2.88539	3.26832	2.80681	2.98329	2.72035	2.69832	2.59073	2.77716	2.52419
PIAS1	2.91514	2.97448	2.90381	2.97309	3.316	2.69606	2.71487	3.15449	3.10926	2.63678	2.72692	2.55304	3.19107	2.89464	3.03225	2.16841	2.99619	3.01039	3.2595	2.97673	2.85733	3.5662	3.00275	3.16038	3.9522	2.49812	2.66488	3.1971	2.85573	2.79329	2.93034	2.54547	3.24682	2.91951	2.79949	2.81541	2.71102	3.56073	3.08331	3.0367	2.9567	3.3256	3.09466	2.45622	2.59719	3.21669	2.86584	3.11367	3.15089
PIAS2	0.664742	0.855946	1.3285	1.17472	1.42746	1.50809	0.741871	1.33569	1.58068	1.10019	1.20855	1.22869	0.839943	1.29798	1.52354	0.966711	1.03779	0.780322	1.51376	1.99082	1.3272	0.947457	0.97447	1.55739	0.726034	0.946549	1.28885	1.28868	0.883472	1.00557	1.26034	0.891767	1.94084	1.05988	1.60286	0.752933	1.33363	0.960642	1.46268	0.874464	1.33833	2.10032	1.54264	1.48034	0.944868	1.35128	1.39725	1.14059	1.28776
PIAS3	3.42672	3.01876	2.39466	3.52137	3.96594	3.67866	3.46641	3.19848	3.51004	2.65899	2.21313	1.25515	3.58937	3.29516	2.86917	3.27417	3.85403	2.85876	3.31988	2.77654	2.8156	3.21558	4.06096	3.03304	2.77655	2.22114	2.25448	2.72168	3.15657	3.6087	2.80228	3.3296	2.91811	3.75173	2.14799	2.23688	3.33239	3.04793	3.26603	2.79762	3.51631	2.80767	3.16452	2.52932	3.07695	3.01353	3.3005	3.20223	2.86315
PIAS4	3.5258	3.09029	2.73543	4.01248	3.05024	3.19861	3.75206	3.53601	3.21553	3.68457	3.23669	3.03586	3.23291	3.28112	2.90469	3.9833	3.27553	2.93474	3.05706	3.6297	3.6626	3.69167	2.89692	2.66254	3.67101	2.74176	3.27156	3.12086	3.36433	3.02522	2.68626	3.96292	2.36783	3.4881	3.24565	3.26017	2.135	2.51166	3.05036	2.94727	3.46996	2.81307	3.40738	2.97107	3.65229	3.00574	2.59547	3.04893	2.74469
PJA1	3.04294	3.35993	2.61967	2.84336	4.02367	2.34611	3.48568	2.98515	2.87055	2.78483	2.46079	1.94981	2.89204	2.05911	2.77266	2.65983	2.1422	2.79487	2.76308	1.79613	3.0521	3.87136	2.71547	2.70517	3.13431	2.59138	1.51824	2.75313	1.94672	2.82924	2.8466	2.64092	3.70731	2.98693	1.70208	1.40177	2.82116	2.75952	3.00856	1.86758	2.56442	2.50314	3.06544	1.67181	3.3201	2.86084	2.76969	2.97512	3.07546
PJA2	3.81358	4.32231	4.44016	4.62308	3.0491	3.87455	3.53201	4.65454	4.29753	3.16418	3.99737	3.68049	4.44598	4.93364	5.69541	2.93536	4.1849	3.60405	5.89207	3.98128	3.60087	4.46847	4.32375	6.05229	4.11546	3.58056	3.79179	4.95879	4.14398	4.25642	3.5769	4.97752	4.91598	3.99775	4.01664	3.75067	5.38148	5.14727	5.80085	3.55159	4.35945	4.2666	6.09983	3.05579	2.98519	5.47905	4.42955	4.05346	5.40758
PML	5.07706	3.99196	3.47545	3.9268	3.57781	2.98021	3.6597	4.06127	3.54307	3.43472	3.33378	3.06976	3.77929	4.03036	3.42449	3.27169	3.73026	3.56861	3.40891	3.55396	2.48583	3.72127	2.8245	2.97855	3.59868	3.03821	3.32131	3.49667	3.04413	3.3689	2.69311	4.02557	2.31674	3.50475	4.35761	3.48159	2.57788	2.61787	3.42217	3.68909	3.44167	3.84824	3.46401	2.83289	4.21286	3.40326	3.69492	4.13313	3.88421
POLB	2.29828	2.03461	2.49256	1.81357	1.63455	1.96874	2.47534	1.50527	2.7932	2.58994	2.08115	2.46746	1.97452	2.17796	1.39661	1.42364	1.99885	1.64519	1.28398	2.16108	2.36204	1.2554	1.69477	1.10531	1.92511	1.44762	1.88878	1.77687	2.11553	2.17327	2.28855	2.06237	3.05093	3.23446	2.55176	1.8437	1.63765	2.44928	1.22664	2.10855	1.88082	2.19195	1.18994	2.30585	2.04999	1.31534	1.59667	1.94094	2.83356
PPIL2	2.96906	2.69576	3.19044	3.67911	3.54402	2.97584	3.0466	2.68994	2.57218	3.10032	2.64985	2.45592	3.21996	2.92466	2.52978	2.98074	3.13927	2.00685	2.469	2.90104	2.99014	3.1995	2.5124	2.59961	2.51231	2.12708	2.64292	2.63978	2.5739	3.09768	2.48264	2.55822	2.57108	2.47207	3.10844	2.37213	2.64214	2.95262	2.45285	2.55484	3.55388	3.11031	2.24169	2.51281	2.87938	2.67368	2.6314	2.75395	2.73197
PRKDC	3.8555	4.27589	4.2883	5.00211	5.2629	4.47352	4.74282	4.01992	5.3582	4.38019	3.63195	3.51764	4.71736	4.18325	3.4627	4.47742	3.79202	3.35888	3.26663	4.60898	4.69037	5.18882	2.97123	3.67915	3.91192	2.39276	3.27467	3.87115	3.62279	3.93238	4.04513	4.4218	4.711	3.31075	4.91638	2.73921	5.46933	5.19551	3.23726	3.49111	4.69437	4.88747	3.26514	4.63236	3.73429	3.14146	4.4244	3.48244	3.78377
PRPF19	6.03014	5.11135	5.48998	6.86728	5.36352	5.65265	6.37962	5.73664	5.62212	6.22876	5.57823	5.73122	4.14728	5.25875	4.64755	6.09826	5.35877	5.76698	4.55907	6.07645	6.01017	6.25859	5.48528	4.27875	4.80779	4.67639	6.17238	4.82155	5.46508	5.61166	5.46505	4.72067	5.06285	5.71295	5.33956	5.49324	4.88138	5.66435	4.23079	5.29499	4.88909	5.11512	4.60706	5.27869	5.88798	4.5462	4.14125	4.98308	5.13399
PSMA1	2.50388	1.93709	2.69996	1.91389	1.84358	2.17822	2.19952	1.94967	2.3909	2.15565	2.07962	2.62177	2.09428	2.16007	1.92394	1.96031	2.255	2.32542	1.97252	2.35615	2.64991	2.07252	1.69898	1.7782	1.98846	1.93053	2.52641	2.11631	2.1182	2.1771	2.21572	2.38478	2.5186	2.23328	2.43246	2.22238	2.52646	2.66092	1.94667	2.29917	1.82332	2.11052	1.82164	2.36068	1.6279	2.07286	1.839	2.2166	2.52916
PSMA2	1.45306	1.17976	1.29462	0.783059	1.0482	1.72508	1.16494	0.916281	1.29435	1.34033	1.78617	2.09662	1.23026	1.24878	1.55368	1.17077	1.36073	1.59002	1.05293	1.47685	1.4237	1.31577	0.927042	0.923767	0.848842	1.53986	1.64661	1.40912	1.76272	1.70563	1.6651	1.12326	1.22374	1.44577	1.43361	1.68846	1.42945	1.3521	0.967267	1.53565	1.14288	1.2699	0.965633	2.03973	1.46196	1.50569	1.04094	1.48208	1.22654
PSMA3	5.17698	4.11797	5.15618	4.03384	3.86835	4.34807	4.625	3.5959	4.88708	4.17344	4.61971	5.15171	4.47595	4.48368	3.99309	4.15322	4.37888	5.19588	4.01422	4.71766	5.05355	4.08703	3.2304	3.83108	4.04693	4.39581	5.4711	4.37124	4.91228	4.29297	4.77453	4.40589	4.88859	4.48597	5.32936	5.31919	5.10182	5.131	3.82054	4.88877	4.45142	4.58684	3.65688	5.14673	4.93915	4.05063	4.08054	4.91959	5.13293
PSMA4	4.76291	3.82266	4.38075	3.63426	3.61689	3.88115	4.11114	3.41896	3.9111	4.05048	4.04426	4.67294	3.9332	3.95502	3.67627	3.46835	3.50439	4.45432	3.12631	4.2865	4.51576	4.03175	2.74786	3.06509	3.47038	3.96222	4.80119	3.69865	4.14964	3.79614	4.62042	3.70339	4.40632	3.91799	4.78263	4.67207	3.72367	4.4191	2.90867	4.23515	3.57461	4.19017	3.20892	4.25818	4.97461	3.46777	3.25872	4.44673	4.51561
PSMA5	4.80884	3.4661	4.78592	3.7867	3.23739	4.44445	4.02962	3.04834	3.96952	4.46384	4.08431	4.22339	3.7256	4.03348	3.04581	3.61761	3.75178	4.64606	2.92287	4.10988	4.53355	3.29789	3.23644	2.71099	3.57738	3.80374	4.78402	3.81005	4.54342	3.72148	4.13412	3.9203	4.44822	3.99082	4.05511	3.99913	4.54894	4.33036	2.82098	4.43438	3.92801	4.07619	2.72631	3.861	3.98232	3.32671	3.11077	4.23023	4.72459
PSMA6	1.74442	1.42518	2.19401	1.95489	1.37195	1.53676	1.63873	1.27289	1.78122	1.76798	1.49768	1.66607	1.34071	1.79025	1.38073	1.61181	1.6512	1.61883	1.14771	1.78269	1.94055	1.45882	1.21477	1.07626	1.30048	1.78935	2.40282	1.40903	1.64765	1.74982	1.75057	1.44231	1.74937	1.73988	2.15412	1.8133	1.75969	1.27348	1.10812	1.53417	1.69995	1.74545	1.2201	1.46191	1.8006	1.34985	1.52659	2.24209	2.23856
PSMA7	7.32346	5.83625	6.88629	5.85081	6.56133	6.72544	6.81829	6.08069	7.15373	6.94506	6.69531	6.24443	6.97585	5.65766	5.50865	7.12596	6.65384	6.9587	5.86496	6.39177	6.37102	6.2914	5.61699	5.28999	5.98128	6.19461	6.71076	6.12033	6.76985	6.11799	6.89983	6.87724	6.10534	6.89871	6.48128	6.658	7.3779	7.28621	5.49232	6.7257	6.58407	6.10407	5.52564	6.89524	6.3537	6.14138	5.67089	6.10525	6.23125
PSMA8	0	0	0	1.85914	0	0.0396617	0.118998	0	0.00912799	0	0.274938	0	0.00970572	0.101747	0.0370162	0.0486987	0.664585	0.0151496	0.0391837	0.0373114	0	0.0112556	0	0.0114238	0.00874101	0.0337984	0	0	0	0.164526	0	0.0203416	0.0266929	0.0452296	0.0308384	0	0.020492	0.0352824	0.0657256	0.0187661	0	0.0505855	0	1.12523	0	0.210384	0.00999964	0.0896657	0.0418087
PSMB1	6.11594	5.53149	6.15298	5.48737	6.3923	6.07539	5.52181	5.08682	5.53157	5.82947	5.54122	6.29418	5.91598	5.2833	5.22139	5.87961	5.29703	6.14964	5.44854	4.90254	6.65488	5.41378	5.16203	5.08904	5.38688	5.49248	6.58302	5.59121	6.14342	5.79495	6.0092	5.79233	5.97418	5.94354	6.14416	5.47239	6.12475	6.25695	5.47684	5.60777	6.34025	5.48076	5.24329	6.47042	5.03216	5.55098	5.0058	6.06412	6.15733
PSMB10	6.39204	3.38418	4.92064	3.75632	2.26732	3.37212	3.78982	3.70386	3.03811	4.89694	5.18031	4.75051	3.65118	5.06672	2.5275	3.93873	3.26608	4.58584	2.56447	3.65585	3.70257	3.44134	2.44063	2.29049	3.65574	5.35844	5.10955	4.15524	4.5439	3.79344	3.97878	3.5947	1.90267	3.52617	5.29106	3.95224	2.17989	2.58747	2.32935	3.26276	3.6288	4.24101	2.4597	3.7223	4.40706	3.02044	2.74756	4.45954	4.7691
PSMB11	0	0	0.00905061	0.0302479	0	0	0	0.00541239	0	0	0	0	0.0259891	0.00786428	0	0.548195	0.100901	0	0.103184	0	0	0.0101074	0	0	0	0	0.00938521	0	0	0	0.0138124	0	0	0	0.00929646	0	0.00923314	0	0.0199816	0	0	0.00768161	0	0.406381	0	0.0444872	0	0.0118144	0.0126371
PSMB2	5.84282	5.07677	5.68929	4.77986	4.32753	4.85208	5.00767	4.66404	4.42631	5.68902	5.11962	5.18577	6.09889	5.18123	4.2767	5.17741	5.12294	6.07397	4.59929	5.08323	5.49326	4.93321	4.84125	4.14859	4.72477	5.00872	5.65852	4.87521	5.26123	5.07875	5.15707	5.11303	5.12882	5.20506	5.72788	5.27302	5.47165	5.19598	4.34716	5.87183	4.7493	4.98123	4.41265	5.58886	5.4407	5.05902	4.39405	4.54874	5.44843
PSMB3	7.51308	6.76634	6.68972	6.2289	6.32616	6.98146	7.33829	6.59665	6.24819	7.00708	7.00665	7.41194	6.37128	6.54252	5.82432	7.54412	6.79577	7.92566	5.97005	6.80212	7.24419	5.84755	6.03228	5.54083	5.94525	7.02461	7.21679	6.22368	7.87003	7.32411	7.15022	6.17856	5.71077	6.69842	7.09936	7.17876	7.47413	8.20712	5.63215	6.40302	6.83654	6.53588	5.49103	7.66584	6.97834	6.4058	5.79509	6.90468	6.64937
PSMB4	6.68927	6.20851	6.5725	5.85809	5.65129	6.1818	5.69429	5.27256	6.02794	6.24719	6.13447	6.21797	6.2537	6.21308	5.25649	6.68622	5.74754	6.48108	5.63116	6.29559	6.31124	5.65173	4.9375	5.14843	7.30848	5.80267	6.51531	5.58366	6.33282	5.2947	6.17672	6.12256	6.04425	6.689	6.37592	6.49082	7.31353	6.42449	5.44467	6.21229	5.49304	5.58826	5.27925	7.81207	6.20215	5.42508	5.08774	6.32438	6.44159
PSMB5	5.96789	5.30907	5.93672	5.4765	5.71382	5.24995	5.24434	4.82257	5.22568	6.08974	5.30162	5.26917	4.96239	5.15194	4.92392	6.16478	4.58716	5.92167	4.96413	5.45716	5.87153	5.14981	5.08647	4.26532	5.06198	5.26367	5.79783	5.01197	5.44699	5.54795	5.04791	5.24025	5.85352	5.36326	5.61494	6.87148	5.59521	5.34632	4.67763	5.23559	4.87478	5.10854	4.64262	5.30874	4.77445	4.78168	4.72403	5.29349	5.72402
PSMB6	6.5966	5.76206	5.76962	4.83698	4.68205	5.65849	5.92526	4.57526	5.28719	6.08092	5.67672	5.62089	5.64036	4.66928	4.93077	6.60005	4.71167	6.33149	5.69893	5.60898	6.34008	4.43925	5.50772	5.05419	5.61109	5.89572	5.79773	5.3579	5.85443	5.75052	5.44025	5.17146	5.39397	5.59461	5.89776	5.90028	5.74839	5.79218	5.4675	5.11448	5.36717	5.21563	5.27697	5.11599	4.83033	5.35989	4.81072	5.49448	5.95906
PSMB7	6.17999	5.96681	6.0683	5.39615	6.32016	5.75628	5.94758	5.69703	5.45656	6.04421	5.71248	6.21093	5.35352	5.7081	5.04836	5.85051	5.4983	4.98083	4.83328	5.713	6.43634	4.37898	5.08636	4.67779	5.44182	5.62827	6.01654	5.26752	6.27341	5.58612	5.9234	6.02269	5.85162	5.7169	6.06402	6.44884	6.12713	6.40393	4.91356	5.95423	5.63844	5.49345	4.84563	5.29394	4.81193	5.38812	5.27258	5.8285	6.07157
PSMB8	7.2052	6.27653	6.74133	5.04776	4.43918	4.91325	5.4916	4.94177	6.30937	6.3943	6.36541	6.95453	5.07091	4.68462	3.98916	6.03175	5.62158	5.96337	3.93357	3.21519	4.34675	5.06581	4.05864	3.58451	4.98735	6.21651	6.73824	5.70927	5.77899	4.84945	5.68275	5.39478	4.05881	5.52324	6.91889	5.90247	4.48594	4.63112	3.74213	5.22731	5.20902	5.95565	3.51024	5.4815	6.48651	4.85712	4.26133	6.94276	6.61995
PSMB9	6.41092	4.65256	5.8374	3.67942	2.39154	3.20252	4.03959	3.4528	4.69181	4.41469	4.88913	5.69442	3.0458	4.2395	2.97888	4.26129	4.58798	4.9382	2.72282	1.88026	1.97246	3.33526	2.37172	2.35948	3.36347	5.57923	4.9405	4.53996	5.26337	3.5948	4.46367	4.59378	2.69736	4.49188	5.54133	4.34524	2.84186	3.5923	2.59537	3.41226	4.03987	4.53304	2.24477	4.17525	5.04151	3.45829	2.58909	6.37357	5.54941
PSMC1	2.44814	2.24461	2.78457	2.47115	2.09463	2.45228	2.56821	2.14998	2.45005	2.74407	2.34761	3.25552	2.2428	2.52899	2.74825	2.58623	2.078	2.3547	2.03186	2.51799	2.97218	2.43591	1.8568	2.04295	1.83771	2.26199	2.92185	2.23942	2.03704	2.35043	3.19106	2.69514	1.8924	2.54365	2.68552	2.19414	2.01472	2.01681	2.11169	2.57207	2.04412	2.15089	2.36163	2.87882	3.13859	2.18928	2.28522	2.0826	2.64878
PSMC2	4.65794	4.01955	4.75777	4.00823	4.16282	3.95636	4.26977	4.01394	4.52893	4.97254	4.06168	4.56171	5.82416	4.56352	4.05039	4.78268	4.53581	4.40386	3.91179	4.12878	5.10807	4.65398	3.54898	4.01085	4.26345	4.15798	4.51838	4.38781	4.61711	4.21942	5.75566	5.27198	4.3624	4.59552	4.60506	3.9779	4.3362	5.05067	3.80738	4.67419	4.70168	4.67063	4.02681	4.18452	4.21539	4.02481	3.98495	4.8968	4.87304
PSMC3	5.53444	5.51432	5.09009	5.25262	4.33672	5.2336	5.24734	4.82686	5.25689	4.94839	5.18116	4.98394	5.36722	5.24895	4.79616	5.90507	5.39408	4.92649	4.61467	5.27683	5.62281	5.63178	4.37504	4.41657	5.91713	5.07488	5.04841	4.77263	4.83643	4.77385	5.09981	5.72674	4.67368	5.56827	5.27526	5.82368	5.05988	5.21742	4.69858	5.49413	4.39935	5.05011	4.63631	4.95709	5.35898	4.43189	4.69808	4.86665	5.51103
PSMC4	6.73871	5.4332	5.5379	6.01521	4.64503	4.88211	5.41436	4.89075	5.34339	5.96738	5.26344	5.05246	5.61047	5.10338	4.26959	5.87987	5.88111	6.84493	4.52029	5.08621	5.73589	4.83162	4.63917	4.31869	5.67977	4.62963	5.55628	4.72812	5.91757	5.07975	5.94887	5.82551	5.37309	5.8295	5.38724	5.89394	6.36957	5.76065	4.21328	5.54276	4.27998	5.36961	4.17291	5.90435	4.86622	4.65265	4.58344	5.00851	5.52005
PSMC5	4.73835	4.10166	4.17504	4.58636	4.40783	4.62467	4.77177	3.63982	4.20898	4.62407	4.47449	4.42316	3.9897	4.2486	4.15042	4.54441	4.21132	4.65518	4.47846	4.18588	4.72431	3.80947	4.07244	3.98327	3.83635	4.01599	4.67949	4.2439	4.05991	4.2204	4.78377	4.2376	4.47158	4.53311	4.46905	5.26987	5.29369	3.87003	4.20323	4.22629	3.94013	4.15027	4.27447	4.53277	4.14698	3.88291	3.87558	4.41737	4.56694
PSMC6	3.00676	2.24147	3.47617	2.70289	2.78529	3.0887	2.92765	2.2883	3.50099	2.80854	2.45074	3.32461	3.28142	3.04323	2.6846	2.66359	2.95458	3.12786	2.74689	3.35658	3.58922	2.93244	2.45255	2.40614	3.09391	2.43571	3.62307	2.88468	3.39924	3.07983	2.98043	3.03179	3.4944	2.86238	3.52574	3.53394	3.38439	3.4234	2.52779	3.18798	2.71537	3.36434	2.56173	3.29402	3.25741	2.66217	2.76882	3.20992	3.25266
PSMD1	4.54605	4.44495	4.96429	5.19779	4.67979	5.06516	5.22699	4.40645	5.28066	4.65193	4.38202	5.5002	5.13483	5.19062	5.19552	4.37048	5.11278	5.22103	4.43893	5.83804	5.98033	4.20071	4.03852	4.58124	6.27525	4.17884	5.55781	5.0647	4.70446	4.63949	5.10606	5.15386	4.7992	5.80777	5.8887	4.95931	4.68146	5.15658	4.22982	5.60293	4.77054	5.01708	4.31171	6.27501	5.41856	4.59757	4.50521	5.12711	4.88649
PSMD10	3.72428	4.2126	4.14056	2.84426	4.28351	3.40988	3.73984	3.4327	3.83422	4.00529	3.84844	3.93612	4.06819	3.73717	3.61614	3.33767	3.55508	4.49794	3.54083	4.81912	4.39401	4.53194	3.35901	3.15462	4.08779	3.43353	4.3184	3.90666	4.99352	3.25137	4.46078	4.10826	4.7494	4.67134	3.84818	3.15102	4.68635	3.95053	3.43151	3.93638	3.05474	4.44154	3.62128	3.94035	3.85635	3.73123	3.19519	3.25786	4.32393
PSMD11	4.06944	4.01134	4.18054	4.23104	4.21144	4.43668	4.61178	4.55425	4.01751	4.31685	3.60426	4.16458	4.32037	4.14469	3.80108	3.84277	4.3566	4.67511	3.6595	5.06273	4.74058	3.64561	3.87882	3.39239	3.93544	3.36153	4.35292	3.7959	3.88535	4.49186	4.87674	4.2017	3.97565	4.04266	4.40941	3.62505	4.33744	4.31135	3.37658	4.44196	4.22066	3.95653	3.54093	5.18917	4.15501	3.88199	3.77932	4.1692	4.10146
PSMD12	3.18392	2.64866	3.76713	3.7196	3.75626	3.61615	4.04413	3.23052	3.3908	3.27617	2.62881	3.6617	3.14896	3.53365	3.12759	2.61392	3.49799	3.39756	2.95298	3.91633	4.1891	3.04896	3.02375	2.97974	3.34033	2.48629	3.86449	2.95854	2.84179	3.1743	3.46681	3.40038	3.73272	3.73384	3.55478	2.82841	3.47278	3.1892	2.80545	3.59221	3.27646	3.40361	2.9003	4.0654	3.47993	2.86323	3.13264	3.33055	3.52399
PSMD13	4.29291	4.18197	4.74981	4.29118	3.90217	4.60946	4.16942	3.77912	4.31201	4.49971	4.15034	4.54902	4.48001	4.11447	3.77164	4.28816	4.82822	4.57767	3.57981	4.47838	4.73136	4.11556	3.3659	3.21882	4.51561	3.62627	4.65119	4.07826	4.12836	3.70455	4.31327	4.62649	4.17809	4.13179	4.71969	4.52346	4.44057	4.49433	3.45665	4.12481	3.80483	4.25343	3.39957	4.51529	3.57203	3.56725	3.68521	4.34295	4.49221
PSMD14	3.13695	2.71538	3.39953	2.67085	2.54314	2.78012	3.09141	2.52985	3.19969	2.8797	2.48119	3.25039	3.06677	2.77527	2.26099	3.48211	2.88728	3.17731	2.07644	3.23584	3.71321	2.99565	2.09512	2.0589	3.18794	2.15085	3.46622	2.89964	2.82502	2.44053	3.74937	2.60318	3.51327	3.36251	3.58881	2.88588	3.0184	3.55273	2.03973	3.14494	2.61213	3.04555	1.84607	3.06446	2.87876	2.51087	2.56014	2.63532	3.4788
PSMD2	5.17288	5.13809	5.12933	4.87677	6.01592	5.36973	4.96449	4.1941	4.94388	5.57501	4.72242	4.51241	5.85835	5.40107	4.56656	5.05759	5.19846	4.73174	4.48984	4.97408	5.46654	5.14544	4.3463	4.12823	4.65344	4.21102	4.76156	4.58228	4.68191	4.00563	5.33261	5.42868	5.09727	4.94268	5.27917	4.44625	5.14358	4.98856	4.28235	5.38982	4.72367	5.51683	4.31131	4.77564	5.54311	4.1941	4.72337	4.95689	5.32778
PSMD3	4.94099	5.07778	5.15838	4.54014	5.09491	5.55483	7.39685	5.65925	4.43419	5.50214	4.56699	4.62436	4.74174	4.83955	3.8455	5.31883	4.61781	4.97422	3.75834	4.83895	5.38508	4.50016	4.06579	3.35945	7.09268	3.72647	5.11827	4.15154	4.51922	4.32778	5.00824	5.0032	4.31646	4.62671	5.16792	5.02567	4.77817	6.1228	3.64015	4.92864	5.08239	4.46639	3.78421	4.89483	4.74144	3.82629	4.1646	4.44439	4.74555
PSMD4	5.13499	5.04451	4.64256	5.05915	4.65266	5.4304	4.74435	4.77591	5.47878	5.07916	4.91599	5.00214	5.34462	4.87441	4.80942	5.50621	4.98681	5.0801	4.91509	5.52969	5.12723	5.32103	4.39926	4.40432	6.31073	4.49317	5.56027	4.90047	5.40355	4.87424	5.72727	5.12826	4.39979	6.20495	5.31105	5.34105	6.13816	4.97332	4.79537	5.25288	4.7384	4.76111	4.93505	6.89787	5.5628	4.59331	4.3786	5.5259	4.75485
PSMD5	3.27655	3.60667	4.0319	3.97703	4.47527	3.46742	3.07018	3.77756	3.75186	4.06885	3.06622	4.00853	3.33809	4.01535	3.47484	3.45636	3.54846	2.9665	3.5308	3.9211	3.63886	2.69059	3.13454	3.41578	3.558	2.71174	3.94269	3.37445	3.74841	3.32385	3.74097	3.86296	4.39443	3.87985	3.86975	3.60625	3.73799	4.29613	3.30992	4.12558	3.51723	3.88838	3.47603	3.42124	2.79791	3.75185	3.80469	4.00046	3.97726
PSMD6	2.91978	2.17223	3.08601	2.73373	2.94438	2.81523	3.09739	2.2427	3.27673	2.74097	2.33465	3.00723	2.32584	2.50043	2.54167	2.19976	2.50825	2.85192	2.63748	3.14223	3.3128	2.3059	2.63056	2.63546	3.18465	2.3036	3.15072	2.57494	2.82907	2.41781	2.87096	2.16825	2.83457	2.55893	2.61375	2.34671	2.89304	2.85252	2.58605	2.98309	3.46937	3.08009	2.62891	2.53448	2.85524	2.6837	2.4589	2.84949	3.00123
PSMD7	4.61047	3.60436	5.06519	4.53778	4.10484	4.88979	4.54682	3.89096	4.46476	4.71281	4.39938	4.85969	4.22158	4.31282	4.47031	4.28661	3.98924	4.50653	3.8984	4.70201	4.98884	4.53421	4.1046	4.17976	3.99972	4.10886	4.68383	4.21934	4.5003	4.60961	5.7386	4.00731	4.80559	4.54718	4.72485	4.15441	4.60125	4.86578	3.90166	3.53859	4.32743	4.33564	4.10264	4.4582	4.70245	4.08755	4.11096	4.29306	4.96031
PSMD8	6.87225	6.24765	5.70841	5.23725	4.67678	5.35406	5.43409	5.30617	5.06385	6.1588	5.5774	5.2347	5.21103	5.33159	4.71848	5.78871	5.48488	6.70276	5.05141	5.12853	6.28205	4.84755	5.61181	4.65384	5.81042	5.67444	5.71096	5.16171	6.24964	6.01225	6.22609	6.28358	5.31276	5.92495	5.39804	5.56322	5.98223	6.18383	4.82825	5.23699	4.24939	5.05631	4.74651	4.89565	5.59508	5.27939	5.09961	5.18824	5.64188
PSMD9	1.78389	1.06011	1.39003	1.46088	0.899465	1.27737	1.712	1.29268	1.36032	1.74137	1.45858	1.62418	1.4979	1.48043	1.33364	1.53282	1.87913	1.80443	1.38877	1.81192	2.1506	1.39313	1.39187	1.07158	2.32717	1.32444	1.93314	1.51481	2.19537	1.60614	1.55857	1.51939	1.4031	1.44291	1.63675	1.51725	1.02795	1.09167	1.31565	1.77666	1.35244	1.90146	1.29707	2.01535	1.28816	1.40971	1.45977	1.46152	1.52492
PSME1	7.86882	6.33121	7.3345	6.17017	5.38639	6.05125	6.05458	5.71982	6.35941	7.07271	7.19727	7.39616	5.82923	6.60945	5.40156	6.79625	5.69393	7.38282	5.86878	6.05051	6.54627	5.92035	5.35232	5.10586	5.48078	6.8043	7.30922	6.5008	6.70114	6.28921	6.14803	6.53164	5.81831	6.17116	7.67511	7.60254	6.25628	5.88396	5.63305	6.15242	6.26137	6.42266	5.47263	6.19283	5.95583	6.07612	5.19172	7.04564	7.35582
PSME2	6.96842	4.89679	6.31018	4.78945	4.12072	4.4508	5.28396	4.07205	5.18346	5.54154	5.76214	6.47055	3.85001	5.66053	3.47434	5.58967	4.1274	6.05251	3.01954	5.02144	5.1115	4.27275	3.67934	2.91549	3.99825	5.94221	6.39875	4.75643	5.41655	4.78842	5.1917	4.61539	4.57614	4.53298	6.40689	6.47505	4.85582	4.56888	3.16492	5.35572	4.83178	5.34125	2.99733	5.14994	4.24267	4.04321	3.67243	6.18937	6.16762
PSME3	5.5135	4.93313	5.36001	5.39234	5.4737	5.71274	5.89422	5.32318	4.88809	5.36348	4.64403	4.55972	4.80385	5.1547	4.0894	4.04566	4.96448	5.33548	3.92027	5.34359	4.99697	4.61189	4.46072	3.8904	4.59755	4.25807	4.86708	4.24251	5.20916	4.85773	5.1593	5.0651	5.03378	4.47116	5.33169	4.67414	5.35893	5.20539	3.78243	5.11794	5.09029	5.04491	3.85881	5.0869	5.11047	4.06608	4.36181	5.07033	5.13037
PSME4	3.05037	2.44513	3.11248	3.61226	3.07474	3.4217	3.53898	3.40414	3.49502	3.01144	2.29191	2.20262	4.22389	3.42497	3.16778	2.48177	3.43031	3.19267	2.86696	3.44423	2.49767	3.26606	2.92878	3.30478	3.66716	2.14242	3.03978	3.08961	2.37836	3.47397	3.78163	3.11509	3.77892	2.73608	3.30198	2.42285	4.42057	3.96121	2.66096	4.06608	3.65736	3.79692	2.7163	3.22337	3.72244	3.04368	3.63893	3.56593	3.53329
PSMF1	5.51591	5.18224	5.70427	4.65415	6.07166	5.39928	5.72065	5.00167	5.62402	5.82463	5.16833	4.99157	3.59518	4.85793	4.2032	5.68759	5.39921	5.01128	4.35679	4.9034	5.03569	5.31856	4.10937	4.10837	4.66134	4.55865	4.80929	4.77983	5.42727	4.53261	4.82364	5.92656	4.50833	4.97629	5.09785	5.98026	4.831	5.43496	4.38835	4.89819	5.75383	5.05914	4.27792	5.04118	4.83951	4.70307	4.289	4.90845	5.00528
PTEN	2.97137	3.15898	3.21182	2.77581	3.52267	2.63554	3.70129	3.44041	3.31881	3.63965	3.07758	3.2227	2.74407	3.80499	3.57883	2.40985	3.67878	1.38774	3.67287	3.77549	3.69182	3.81025	3.11909	3.62676	3.14656	2.66525	1.82519	3.37977	2.31346	3.46989	3.0759	3.51162	3.6987	3.17645	3.29714	3.01021	3.57624	2.91004	3.54753	3.32756	3.51567	4.01411	3.63037	2.57902	1.92209	3.37301	3.48123	3.2767	3.02305
PTRH2	2.42087	1.86813	2.87017	2.63372	2.88106	2.88395	3.19551	1.84534	2.42963	2.69651	2.27009	3.18236	1.83174	2.06188	1.68347	2.34028	2.34694	2.7637	1.51932	2.87521	2.58317	1.62056	1.551	1.63509	2.99533	1.65103	2.6092	1.96449	2.09945	2.48666	2.71289	2.03589	3.01458	2.38329	2.74122	2.45871	3.70814	2.48373	1.43353	2.21773	2.47014	2.18074	1.4758	3.18159	3.11868	1.58518	1.87609	2.41121	2.42615
RAD18	1.41539	1.44429	2.55005	1.81044	2.57928	2.57576	2.95502	1.79407	1.95993	1.88292	1.75173	2.49487	1.44801	2.19869	1.09227	1.21842	1.82454	1.64625	0.949317	2.05982	2.13806	2.10973	0.901633	0.930257	2.13604	0.814465	1.94473	1.81214	2.15984	1.60309	2.32354	2.17452	1.49744	1.63262	2.73317	1.25808	1.98849	1.92945	1.06305	2.21078	1.89571	2.40221	0.983474	2.08179	1.97889	1.35956	1.46472	1.81329	2.06788
RAD23A	5.91414	6.16218	5.62777	5.54038	5.20197	5.27914	5.59293	5.65055	5.09727	5.96013	5.3645	5.28024	5.20477	5.56815	4.84931	5.30932	5.26313	4.69397	5.20748	5.78981	5.68964	5.90043	4.95772	4.72974	6.82653	4.85581	5.678	4.76813	5.69269	4.88143	5.05403	6.31958	5.35442	5.59629	5.83988	5.39634	4.98318	5.01994	4.98973	5.24826	4.94996	4.98319	5.23171	5.23017	5.80579	4.83192	4.83523	4.92738	5.34589
RAD23B	5.53215	5.64192	5.50449	5.84812	5.89782	5.66105	5.85871	6.14425	5.17207	5.57214	4.78972	5.33662	4.41094	5.25875	5.26103	5.4111	5.16964	5.09749	5.1542	6.15755	6.05319	5.06459	5.87047	5.09855	5.1731	4.59586	5.91737	5.08756	5.03423	5.22567	5.82556	4.57977	5.54748	5.26005	4.97237	5.07359	5.34828	5.38453	5.02376	5.60053	4.39136	5.04118	5.16751	4.74331	4.74366	5.41742	4.87293	5.23851	5.45049
RBBP6	2.68409	2.59302	3.01769	3.07825	3.1696	2.73878	3.15049	2.57082	3.57247	2.4278	2.61711	3.04314	3.0308	2.81796	3.31396	2.85222	2.88342	2.31566	2.92619	3.95262	3.55768	3.48783	2.20618	3.20598	2.94481	2.20677	3.02376	2.94482	2.09101	2.65084	3.11317	2.7066	3.36386	3.27215	3.03139	2.48369	3.33115	3.33881	3.16966	3.34721	3.40085	2.9144	3.28059	3.57109	3.11855	2.81437	2.97204	3.09334	2.94399
RBCK1	5.50068	4.87047	5.53489	4.64305	4.82715	5.45188	5.39227	4.89064	5.74744	4.95412	4.9006	4.55049	3.76559	4.84519	3.8175	5.94789	5.36386	4.70467	4.03367	5.39254	4.63889	5.08971	3.70982	3.36957	4.89259	4.00756	4.95638	4.69467	4.86933	4.25917	4.69817	5.3688	3.69775	5.3884	5.43304	5.41538	5.13493	4.41561	3.94204	4.7085	5.04567	4.90507	3.79981	5.10884	4.96537	4.35407	4.30796	5.1582	4.76984
RBX1	4.74573	3.3635	4.10531	3.20585	3.70876	3.76887	3.83222	2.98038	3.3942	3.58029	3.96842	4.28701	3.37081	3.15444	3.48562	3.66471	4.09832	3.95814	3.80996	4.08568	3.60951	3.15797	3.65567	3.25051	3.51765	4.00774	3.97613	3.5564	4.16277	4.3837	3.35659	3.29951	4.09595	3.64723	3.72656	4.0746	4.4124	3.99757	3.58405	3.8967	3.44477	3.72257	3.44401	3.93081	4.18629	3.69207	3.27796	3.86529	4.06071
RCE1	3.83595	3.10733	3.31167	3.04256	3.01886	3.38877	3.2017	2.90551	3.45184	4.12005	3.38987	2.33493	2.39745	3.56514	2.00278	3.89517	3.48884	3.07438	1.71151	3.24786	3.32775	3.34457	2.84349	1.40269	2.64999	2.82191	3.32632	2.50305	3.05742	3.1684	2.72427	3.63223	3.09728	3.59177	3.06191	4.39941	2.72341	3.38559	1.80557	3.42783	2.63077	3.15781	1.7147	2.54992	3.7886	2.22449	2.40165	3.74695	3.10468
RCHY1	1.86751	1.33053	2.78997	2.03187	2.18389	1.77418	1.50135	1.6071	1.93563	1.86634	1.73703	2.68052	2.09414	2.46609	1.71277	1.42427	1.77339	1.87253	2.02643	2.13299	2.78619	1.8681	1.22486	1.71762	1.49922	1.43445	2.55302	1.86921	1.90744	1.91346	1.62838	1.67246	2.89232	1.95245	2.30918	1.14969	1.97006	2.38702	1.87021	1.84446	2.10448	2.0084	1.97107	1.76113	1.62291	1.94805	1.81652	1.81174	2.43668
RHBDD2	5.60066	6.79923	4.95244	5.17526	6.4823	5.88958	5.6546	5.7102	5.15127	6.15585	5.73021	4.19771	7.3088	5.37803	4.19108	6.5745	5.8777	5.49081	4.52824	5.42509	4.82565	6.91109	5.13264	3.97375	5.94545	4.92118	5.11321	5.50311	5.86969	5.52265	5.66184	6.22924	4.89434	5.66401	5.01813	5.36135	5.14083	5.0851	4.16542	5.57821	5.5264	5.65551	4.09635	4.48645	5.61473	5.17161	5.55181	5.30076	4.67345
RHOA	7.93833	7.8772	7.75936	7.51877	7.47135	7.40564	7.85188	7.18895	6.88044	7.53886	7.77281	7.25045	6.86718	7.69074	7.36896	7.74483	7.36055	7.91829	7.32608	7.84686	7.67325	7.17045	7.52457	6.93161	7.34781	7.43128	7.77549	7.303	8.20523	7.21656	7.01491	7.19446	7.6656	7.36011	7.30875	7.54993	7.71042	7.04939	7.29072	7.7982	6.96021	8.00306	7.07391	6.4306	8.0977	7.29833	7.25159	7.46338	8.23417
RHOBTB2	2.26408	2.73965	1.52444	1.93171	2.24134	2.44238	3.28504	2.76574	2.38967	2.24545	2.56489	1.10111	2.98779	2.31783	2.83418	2.29814	2.09608	1.67802	2.58003	1.73455	1.86757	2.06464	1.24878	2.44584	1.5298	1.96591	0.988152	2.5212	1.36782	1.2742	2.27978	2.53006	1.91081	3.0741	1.71292	1.60153	1.7115	2.55909	2.66037	1.76819	2.24416	2.96186	2.1066	1.4957	2.59528	2.46178	2.64739	2.10033	2.11168
RHOT1	2.1624	2.53802	3.04909	2.80997	3.08322	2.69855	2.73896	3.46552	2.71821	1.95266	1.8246	2.15913	2.75325	2.53337	2.46365	1.95235	2.80181	2.01115	2.98363	3.36942	3.07514	2.68721	2.53693	2.88456	2.30284	1.9749	2.71385	2.60253	2.51814	2.60508	2.8011	2.68905	2.91592	2.30281	2.58305	1.86408	3.30023	3.19008	3.15446	1.92527	2.79906	2.52582	3.11115	3.2855	2.35382	2.58332	2.39417	2.28045	2.86904
RIPK1	3.39298	3.41302	3.71236	3.93642	3.20655	2.35778	3.41754	3.28482	3.91551	3.31027	3.40274	3.00128	3.59317	3.85186	3.32297	3.26802	3.58126	3.35989	3.18935	2.95594	3.42924	3.69982	3.09277	3.28448	3.60108	3.04948	3.48591	3.96578	3.54812	3.42114	3.33057	3.54346	3.47281	3.50283	3.57446	3.05042	3.83445	4.01741	3.42501	3.56806	3.03003	3.72412	3.19566	2.99367	2.63989	3.44646	3.72199	3.90094	3.9563
RIPK2	3.76042	2.52511	3.01134	3.22309	2.98356	3.89525	3.35114	3.41425	3.58535	3.69656	2.94499	2.89172	2.31455	3.29642	2.58188	3.37967	2.59133	3.07405	2.11224	3.19476	3.39156	3.0964	2.19958	2.30079	3.99965	1.70546	4.13267	3.14265	3.24054	2.6819	2.78386	3.47352	4.20259	3.10456	4.35478	3.17066	3.87254	3.61855	2.16012	3.07084	2.96059	3.5211	2.15611	4.18227	3.02078	2.71475	3.43024	4.08109	4.77081
RLIM	2.68491	2.96032	3.06315	3.24513	4.32285	2.96875	3.66915	3.48572	3.62493	2.25586	2.18323	2.56446	3.44579	3.15527	2.94763	2.06276	2.81663	2.94446	2.82465	3.57562	3.18381	3.92033	2.94473	2.84828	3.66173	1.94303	2.84555	3.25592	2.28709	2.78159	3.26448	3.14163	3.63316	2.60498	3.14618	2.10729	3.80876	3.20256	2.74681	3.11865	3.42906	3.18223	2.83944	2.96969	2.71069	2.91109	3.44376	2.96118	3.60859
RNF103	2.41975	2.20016	2.56789	2.28192	2.14585	2.63494	2.42014	2.79177	3.34567	2.71136	2.27475	2.18676	4.05292	3.20857	2.72176	3.18844	3.03097	3.14543	2.57731	2.90052	2.77857	2.82354	2.51077	2.76168	3.83754	2.46766	2.49319	3.35281	2.17972	2.7818	3.31369	2.70041	2.57571	3.16936	2.61042	2.88006	3.77163	2.86509	2.58342	3.64552	3.20025	3.19309	2.78481	2.87393	3.36556	2.84013	2.67808	3.06092	2.53824
RNF111	2.48872	2.47012	1.87437	2.70533	2.84004	2.26325	0.601656	2.5144	2.73733	2.1708	2.0349	1.89408	3.15459	2.66526	2.41326	2.00551	2.49783	2.34134	2.31316	2.7498	2.14966	2.94667	2.27355	2.24253	3.09989	1.80509	2.23125	2.55902	2.07695	2.32975	1.81092	2.66163	3.02185	2.35783	2.56136	1.33935	3.12459	2.75687	2.09082	2.65471	2.75881	2.91782	2.18534	2.10195	2.13743	2.37485	2.88045	2.63383	2.79665
RNF114	4.48562	3.77238	5.17956	4.85145	5.09298	4.82298	4.73265	4.48263	5.59146	4.61614	4.3945	3.84041	4.56288	4.22625	3.42987	3.85666	4.55556	4.03806	3.45358	4.31921	4.41489	4.93741	3.38309	3.04096	3.98026	3.31021	4.56785	4.20418	4.53194	3.55777	4.45738	5.12934	4.05454	4.9221	4.22306	4.20291	4.51543	5.29719	3.34801	4.54702	4.19085	4.2449	3.27966	4.84342	3.4335	4.05304	4.12277	4.26519	4.39183
RNF115	2.11524	2.34716	2.21911	2.38865	2.42203	3.08115	1.90278	2.62584	2.66634	1.84189	2.04727	1.95618	2.39889	2.34398	3.14673	2.90639	2.29806	2.26005	3.09547	2.94084	2.32344	2.87293	1.89218	3.0498	2.68794	1.83751	2.2987	2.47399	1.83865	1.96387	2.3995	2.45051	2.17548	2.81088	2.21859	2.41235	2.27734	2.8787	2.8556	1.75396	2.63131	1.70797	2.62654	2.89105	1.24361	3.11893	2.35913	2.679	2.31679
RNF121	2.6578	2.45925	2.51232	3.14907	1.99253	2.83532	2.34358	2.47857	2.55665	2.58119	2.12494	1.73855	2.93047	2.34495	2.33755	2.43116	2.55972	2.40423	2.03364	2.39803	2.47805	3.10959	1.99634	1.84131	2.08728	1.83495	2.2393	2.13226	1.94486	2.09897	2.16343	2.52545	2.33927	3.05108	2.1336	2.62252	2.63476	3.28355	1.98462	2.10156	2.03148	2.62149	1.99128	1.67281	2.47616	2.20839	2.23395	2.95081	2.50289
RNF123	2.47352	2.78268	2.78816	3.21788	3.52379	2.99712	3.08196	2.37122	2.3067	2.45735	2.2192	1.9039	2.98088	2.70572	2.31268	2.27128	2.53504	2.23251	2.36548	2.55346	2.65032	2.33279	1.96974	1.94663	3.61518	1.76121	2.2519	2.47641	2.35918	2.13316	2.42921	2.42555	2.33155	2.1932	2.72332	1.75218	2.30501	2.15979	2.37034	2.55239	2.84647	3.42216	2.17919	2.23445	2.46943	2.24994	2.73844	2.53703	2.41238
RNF126	4.50183	3.19	4.369	4.29041	3.49998	4.24618	4.67083	4.43374	3.95137	5.26983	4.35187	4.64538	3.76069	4.36059	3.08684	3.99585	4.3545	4.23377	3.50862	4.40134	4.82825	4.05	4.61505	2.7213	5.68166	3.72244	4.98503	3.67548	4.59442	4.15323	3.65875	4.63124	3.83271	4.32266	4.76574	4.66532	2.52765	3.29653	3.29964	4.42668	4.18543	4.09792	3.38689	4.54802	4.33382	3.58274	3.34861	4.39096	3.80804
RNF128	4.21754	4.5035	4.92309	0.502674	2.77608	3.57577	4.94113	4.04083	4.91374	4.97675	3.60902	4.19086	4.52034	3.85253	2.26845	3.94123	3.54022	5.14307	0.0782159	2.61542	4.73469	5.08127	2.75411	1.47344	4.90867	3.9718	4.03457	5.19524	5.56007	4.12096	4.3429	2.24782	3.65583	3.59617	3.75825	3.64378	5.23566	4.4344	1.04789	5.17987	3.44551	5.52827	0.391002	4.63592	5.55935	4.61067	2.76305	3.92317	3.01923
RNF130	2.40546	3.17787	2.83175	2.37923	2.26294	2.02627	0.737562	2.22905	2.34703	2.61172	3.10808	2.60121	2.57979	2.99721	2.75377	2.31238	1.88469	1.84962	3.04344	2.4073	2.75816	2.13797	2.21049	2.7381	2.35094	2.28779	2.47069	3.33872	2.87498	1.98104	2.81822	3.01062	2.31188	2.40644	1.58904	1.53736	2.75597	2.63007	3.0191	1.45142	1.75685	2.15637	2.94889	1.97558	2.57036	3.01175	2.58035	2.32658	3.48529
RNF135	2.44872	2.55161	1.46948	2.75367	2.18974	2.16194	1.95844	2.72203	2.73511	2.52439	2.73017	2.15167	2.81315	2.97961	2.43808	2.86031	2.76698	2.75419	2.65581	2.21581	2.43034	1.44341	2.69896	2.26745	2.18163	2.0035	2.84584	2.89994	2.79721	2.87321	3.18353	3.06515	2.82394	2.75895	3.11092	2.40724	2.56728	2.28599	2.4213	2.30589	2.60031	2.39259	2.2148	3.54619	3.67913	2.49858	2.29617	2.67672	3.17298
RNF138	3.32501	2.87823	3.75432	3.18288	3.07889	3.16188	3.26972	3.24239	3.69824	3.34277	3.07899	3.4368	3.2205	3.57707	2.65057	2.55134	3.47703	2.78341	2.6667	4.14832	4.05852	3.74785	2.7354	2.41591	1.92464	2.15522	3.60817	3.13205	3.06699	2.91825	2.1581	2.57805	3.52693	2.86737	4.26477	2.54686	3.18186	2.6134	2.73312	2.94747	2.48607	3.71168	2.88269	3.66729	2.71436	2.86161	2.64351	3.41107	3.3444
RNF14	2.71763	2.85027	2.82567	2.89867	2.73525	2.93172	2.32667	2.61107	2.85232	2.25544	2.53938	2.72251	2.53456	3.08352	3.09875	1.72731	2.71101	2.63316	3.40348	3.03575	3.49687	3.03485	2.22775	3.22608	2.71929	2.57757	3.06382	2.98712	2.82075	2.63072	2.98909	3.43567	2.64755	2.6353	2.70054	1.98453	3.29419	2.88753	3.20289	1.85717	2.41319	2.47814	3.28357	2.31522	2.68301	3.27186	2.62885	2.46175	2.79744
RNF144A	0.53975	3.08096	1.80083	3.46434	0.752245	2.21711	0.563645	3.28582	2.49121	1.16206	1.55575	1.52099	1.15991	2.06365	2.54961	3.17092	1.70796	1.23063	1.64219	2.4131	2.36452	2.2821	1.47601	2.09833	1.89624	1.16892	1.41916	2.21615	1.04152	1.86546	1.63929	3.25276	2.79596	2.75519	1.73489	1.5331	2.64987	1.66814	1.77147	1.10385	3.15253	1.53015	1.62045	0.788004	2.02769	2.09482	3.00747	1.29598	2.87142
RNF144B	2.23547	1.28236	1.23088	2.16674	1.2408	1.23888	0.736863	2.07087	1.30883	1.0771	1.66891	0.497544	1.94336	1.98212	3.17503	2.29598	3.1982	1.74539	1.72282	1.13659	1.2174	1.40661	3.22118	3.44256	0.720052	1.68746	1.14282	2.44741	1.3801	2.64438	1.10909	1.25712	2.107	1.46955	1.10911	1.52334	3.42679	1.56422	1.84291	0.897257	1.45767	1.47651	1.786	1.13028	3.60917	3.28584	2.56946	2.35153	2.50848
RNF146	2.6848	2.71023	2.5959	2.9423	3.25853	2.89693	1.9091	2.72737	2.81589	1.68628	2.3433	2.28984	2.76596	3.00169	3.25906	2.37678	2.67631	2.05174	3.42645	2.80005	2.28222	2.75512	2.09134	3.36233	2.85874	2.00271	2.55858	2.66649	2.22883	2.33446	2.65209	3.34177	3.18686	3.45859	2.37403	2.2922	3.03398	3.46737	3.21471	2.20102	3.37621	2.19345	3.28691	3.40649	1.76534	3.07731	2.9643	2.52182	3.06775
RNF152	0.382788	0.825656	0.277766	1.294	0.254215	0.690678	0.409919	1.34629	0.833847	0.585123	1.22801	1.545	1.78687	1.4644	1.24628	0.611167	1.66408	0.975685	1.63037	0.347389	2.30674	1.15111	1.95564	1.39974	0.793206	1.43613	0.96112	1.2294	0.615538	2.02454	0.570393	1.40765	0.744431	1.81515	1.02436	0.81908	1.78511	0.870006	1.46411	0.795646	1.32669	1.5322	2.20883	0.936244	1.24154	0.89108	1.85818	0.877468	1.46556
RNF175	0.0869494	0.143475	0.101103	0.221978	0.045559	0.0842364	0.0895971	0.155506	0.0881176	0.0848356	0.143887	0.171277	0.162729	0.0738794	0.738367	0.112987	0.319717	0.0767667	0.146532	0.0946694	0.0405118	0.0526529	0.144382	0.236769	0.0410201	0.014679	0.0489419	0.0811368	0.0192385	0.0875169	0.0967425	0.102342	0.220532	0.203064	0.0827512	0.0966803	0.245075	0.275083	0.256279	0.0946192	0.184315	0.0792264	0.385348	0.543549	0.107109	0.371294	1.00162	0.439033	0.427208
RNF181	5.84125	4.93802	5.07821	4.66843	4.58528	5.66157	5.05545	4.53278	4.93686	5.13998	5.19829	5.80163	5.29499	4.50194	4.6503	5.66242	4.66945	5.97117	4.9498	5.21301	4.86551	5.06197	5.40463	4.7518	5.60197	6.25831	5.37426	5.29162	5.88509	6.32376	5.44023	5.51361	4.60169	5.70083	4.97885	6.09958	6.30675	5.56381	4.7427	4.82105	4.37306	4.65326	4.40331	5.70788	5.81783	5.49641	4.36595	5.42612	5.00661
RNF182	0	0.126244	0.39853	1.62655	0.274707	0.0873074	0.0207382	0.138592	0.0783983	0	0.071994	0.00828249	0.108554	0.024205	0.242373	0.00572272	0.110253	0.0140364	0.106346	0.0683684	0	0.613098	0.118843	0.0925664	0.0241571	0.0619935	0.0288547	0.150012	0.0155073	0.016051	0	0.0512545	0.0247387	0.0907055	0.0332931	0.0976349	0.0653954	0.921623	0.109888	0.0173888	0.0407082	0.0197317	0.10169	2.01877	0.0653293	0.654011	0.223404	0.03028	0.0980833
RNF185	3.46091	3.75098	3.46753	3.81754	4.07626	3.41119	3.37093	3.71272	3.51489	3.65668	3.52399	2.84517	2.97346	3.73111	3.95103	3.78355	3.81347	2.8329	3.87932	3.32085	3.52454	3.58132	3.91721	3.44659	3.48645	3.25656	3.05293	3.56393	3.07164	3.62644	3.35854	3.53741	3.41283	3.23634	3.04085	3.41736	3.23968	3.55473	3.81326	3.41336	3.55543	3.39992	3.66161	2.66626	3.71151	3.9957	3.47407	3.70095	3.70328
RNF19A	2.75711	2.36097	3.02518	3.23654	3.1169	3.75725	2.68663	3.34508	3.65832	2.84048	2.83193	2.86649	3.76451	3.61618	3.78852	2.66567	4.08682	3.10135	3.37842	2.53987	2.90265	2.50255	2.78794	3.70102	2.97622	2.32632	3.26454	3.58645	3.21545	3.487	2.9004	3.45406	3.4997	3.01399	3.77492	2.05251	4.79961	3.90612	3.23625	3.99294	3.64193	4.23958	3.28533	3.34589	3.11144	3.80841	3.78053	3.87198	4.05289
RNF19B	4.7678	4.19074	4.55379	4.5752	3.82946	3.60347	4.29395	4.14865	3.76718	4.54667	4.02387	3.1196	4.97424	4.74211	3.8497	4.00261	4.11601	3.71186	2.74289	4.24298	4.53	3.31083	4.74675	2.73413	5.80115	3.4921	4.51937	3.94229	4.0868	4.21603	3.28644	5.18506	4.21064	4.23619	5.5202	3.34896	4.24007	3.64915	3.05123	4.45581	4.50404	4.57086	2.86937	3.13323	4.49534	3.67925	4.72895	4.0642	4.73708
RNF20	3.20037	3.71754	3.49858	4.02978	4.60695	3.80184	3.76249	3.68507	3.72282	3.12599	3.20149	3.63697	3.43982	3.83072	3.74071	3.25871	3.48761	2.43975	3.30124	3.543	3.87714	3.0911	2.58799	3.27166	2.84237	2.90393	3.29339	3.71293	2.8237	3.24207	3.65905	3.18836	3.05466	2.95017	3.50362	3.19473	3.69694	3.84424	3.33847	3.08594	3.35851	3.29632	3.36836	3.27303	3.10961	3.46795	3.25737	2.98268	3.49927
RNF213	5.10611	4.20693	3.79423	4.13906	3.95594	3.30727	3.57788	3.89578	4.42504	3.68004	3.01914	2.15334	3.33701	4.49987	2.80465	3.38453	4.52725	3.84328	2.47223	3.0741	2.3449	3.8675	2.30863	2.72514	3.82834	3.16514	3.02383	4.01257	2.28903	3.48923	3.63684	4.26539	2.72368	3.58691	4.39391	2.09874	5.39937	3.35402	2.63298	3.89445	4.51946	4.5682	2.26312	3.46822	3.92146	3.14696	3.78653	4.82213	4.94417
RNF217	0.418492	1.16431	0.277359	1.54454	0.109902	1.21234	0.253757	1.5619	0.824113	0.106068	0.611015	0.159646	0.406154	0.784851	1.89779	0.262695	0.802897	0.263351	2.07478	1.85333	0.156532	0.375373	1.82604	2.468	0.401252	0.828969	0.228163	1.11317	0.238613	1.17888	0.279341	2.02522	0.576548	0.798405	0.503201	0.527261	1.48982	0.725212	2.06395	0.325655	0.897655	0.235335	2.27139	1.12556	0.625994	2.05277	1.726	0.499882	1.6947
RNF220	2.93719	2.67932	2.85647	2.8246	3.16643	2.61802	2.60115	2.33233	2.35756	3.30081	3.26637	2.97096	3.13425	3.05963	2.277	3.2073	2.4985	2.34025	2.22104	3.19161	2.90424	2.52901	1.85132	2.17948	2.72377	2.12588	2.80277	2.26719	2.30251	2.20737	2.5656	2.66264	2.4319	3.0243	3.10521	2.85553	2.45695	3.07641	2.22285	2.55999	3.04813	2.50069	2.30025	2.7336	2.52775	2.35231	2.29204	2.48159	2.53018
RNF25	3.57835	2.98745	3.08155	3.36571	3.3987	2.83967	2.95991	3.01019	2.79296	3.2387	3.21541	2.57581	2.81955	3.06227	2.79617	3.80756	2.8582	2.83871	2.94848	3.14165	2.5862	3.51452	2.80063	2.7097	2.97772	2.75686	2.66746	2.57334	2.57985	2.99869	2.6442	3.41665	3.03325	3.5533	2.58282	3.28238	2.83255	3.33102	2.81869	2.73385	2.79961	2.74785	2.90369	2.45617	3.10867	2.84535	2.58809	3.02902	3.06279
RNF34	3.30091	3.04981	3.43191	3.21411	2.70281	2.49301	3.50096	2.33394	3.22348	2.96048	2.96075	2.77208	2.80195	3.02743	2.886	2.75696	3.05596	3.21326	2.44419	3.21834	2.83339	3.57463	1.7238	2.32685	3.76895	2.28172	3.25379	2.73971	3.31803	2.37274	2.80167	3.20625	3.33667	2.78878	3.07826	2.81209	2.82147	3.43483	2.52869	3.0841	2.69145	3.39469	2.44951	3.03344	2.13602	3.30211	2.6753	3.18639	3.0215
RNF4	3.9216	3.4825	3.90724	3.7498	2.73259	3.2541	3.4175	3.15683	3.27666	3.66438	3.44164	2.78626	3.57306	3.90873	3.08898	3.43363	3.15087	3.24091	3.23035	3.85196	3.36541	3.10413	3.24123	2.8319	3.33749	3.20758	3.22024	3.14329	2.47714	3.32564	3.09917	3.37517	3.57114	3.31601	3.41348	2.4009	4.35944	3.37128	3.14115	3.42124	3.50835	3.60912	3.08687	2.90249	3.73142	3.33408	3.50419	3.36995	3.88104
RNF40	3.32263	4.12007	3.14359	4.02594	3.90268	3.38655	3.85157	3.10943	3.48977	3.14446	3.0242	2.5845	3.58394	3.80616	2.82053	3.71085	3.32254	2.3421	2.64067	3.62348	3.52738	4.15227	2.87718	2.37175	3.90842	2.50418	2.9917	3.08132	2.32846	3.1015	3.31913	3.57701	2.64731	2.98189	3.78547	2.77436	3.74737	2.89733	2.64308	4.12163	3.84743	3.5328	2.65843	2.79178	3.4597	2.52761	3.2347	3.23751	3.13267
RNF41	2.95218	3.16155	3.1069	3.54288	2.68031	3.02984	2.95607	4.11517	2.58235	3.14393	3.2701	2.3401	2.76902	3.05752	2.92102	2.97836	2.94253	2.49093	2.92997	3.0403	2.41353	3.26313	2.75149	2.8286	2.35323	2.21411	3.01818	2.58723	3.55496	2.35302	2.54772	3.01883	3.67691	2.94468	2.91487	2.59993	3.08181	3.13586	3.09276	2.8613	2.47818	3.07059	2.87971	2.81328	2.16951	2.8493	2.75	2.57994	3.37569
RNF5	6.20241	7.13548	6.24822	5.60259	6.33672	6.15686	5.40202	5.40819	5.61993	6.11071	6.27908	6.26757	5.72546	5.30757	5.17662	6.69911	5.71106	6.11366	5.49236	5.94096	4.91217	6.45598	5.20492	4.89959	5.80662	6.31305	5.72308	5.32957	6.61846	5.5662	5.70699	5.8263	4.99256	5.81928	5.39755	6.50985	5.33626	6.07713	5.2755	5.25695	5.30209	3.69948	5.54622	5.46353	6.06905	5.5605	4.52335	5.71883	5.37227
RNF6	3.81361	2.88928	4.56283	3.37543	5.02662	3.84193	4.27073	3.34768	3.59264	3.30118	3.0634	3.43458	3.83425	3.53603	2.96828	2.81633	3.44663	3.26649	2.50668	3.99075	3.64099	3.91241	2.88903	2.87594	3.5253	2.49423	4.06196	3.26684	3.29931	2.90037	2.81734	3.36257	3.95495	3.43405	3.74613	2.65503	3.60208	4.12757	2.40558	3.75123	3.5412	3.67101	2.44034	3.69621	3.48245	3.28665	3.28314	3.76479	3.79003
RNF7	4.63795	3.63653	4.34038	3.67062	4.88487	4.57188	4.19468	3.50141	3.61333	4.0543	4.09704	4.65873	4.17851	3.57279	3.7952	3.6413	4.52907	4.68483	4.16956	4.00054	4.35037	3.60211	4.04127	3.52502	3.72821	3.84328	4.57147	4.04642	4.95072	4.78553	4.54651	4.24483	4.44982	4.62208	4.09465	4.50879	4.23829	4.2681	3.83764	4.14897	4.20831	4.51158	3.78033	4.69042	3.68341	3.98691	3.46714	4.0581	4.03474
RPS27A	7.76178	6.23238	7.49471	6.62192	6.9972	7.72279	7.22866	6.86009	7.73239	7.65233	7.93684	7.49224	6.94001	6.68378	6.95227	7.0223	6.8458	7.44038	7.61998	7.53083	7.59164	6.49385	6.81183	6.45443	6.78859	7.5676	7.79784	7.32004	7.9902	7.66934	7.91434	6.56293	7.67186	6.59913	7.44822	8.1075	7.57967	7.98695	7.3501	8.11776	7.21673	6.63363	7.3345	7.44922	7.4307	7.44518	6.23371	7.15935	7.25345
RRAGA	5.56497	5.7712	5.41302	5.4689	5.14991	5.07335	4.91418	4.89715	4.74283	4.86075	5.23471	4.48156	5.10527	5.08605	5.79337	4.87872	4.94076	4.60751	6.02537	5.1698	4.5942	4.62226	5.42754	5.76592	4.81503	4.65126	4.77828	5.2499	4.8423	4.95851	5.12975	5.63867	5.19037	6.47314	4.85593	4.70886	5.45028	4.65804	5.90896	4.76895	4.52206	4.81658	5.95599	4.86445	4.92114	5.70802	5.20964	5.80674	5.60168
RTF1	3.76375	3.36113	3.98623	4.14774	4.09568	4.18179	4.21092	4.23483	4.19285	3.04388	3.92942	4.84926	3.9189	4.11007	4.41606	3.9098	4.01728	3.63469	4.05142	5.70871	4.45732	4.65522	3.48947	4.05671	2.9476	3.68807	4.21957	4.06338	3.31467	3.40109	3.78823	3.69497	3.84552	4.6836	4.33801	3.77572	3.81581	3.75736	4.19472	3.84348	4.06403	4.07572	4.28646	4.64833	3.91498	3.62028	3.74729	4.23827	3.9002
RUVBL1	2.86781	2.52813	2.91318	3.07838	4.09153	3.3762	2.75376	2.5029	2.58654	3.08196	2.52432	2.55697	2.75158	2.748	1.81619	2.57639	2.49219	2.81951	1.6278	3.16339	2.97027	2.68431	1.72994	1.64875	2.13565	1.6776	2.86617	1.88683	2.80129	2.25562	3.19709	2.86326	3.10039	3.0893	3.42961	2.73589	2.91807	2.65893	1.52658	2.81786	2.98962	2.79788	1.66235	3.35198	2.14494	1.65002	1.84573	2.47641	3.09955
SAE1	5.44048	5.21897	4.50317	4.57239	3.82819	4.27954	5.04466	4.04883	4.44346	4.8367	4.2963	3.54235	4.65811	4.29657	4.3194	4.29007	4.76801	5.36453	4.06955	4.74231	4.8353	4.56424	3.26539	4.10031	4.13202	3.57207	4.09375	3.8633	4.44902	3.98259	5.14036	5.12428	4.48291	4.72146	4.58611	4.09913	4.99386	5.00178	4.41824	4.07771	4.27981	4.54843	4.70358	4.51537	3.11091	3.77876	3.87364	3.99167	4.79011
SEC61B	6.37794	6.05382	5.95037	5.47747	6.00697	5.61297	5.88228	5.39299	5.63757	5.40228	6.02932	6.25519	4.92216	5.54735	5.48054	5.38321	5.51971	5.62705	4.87034	6.13039	6.2304	4.52683	5.47591	4.52298	5.38938	6.68564	6.56389	5.21404	5.91361	5.65237	6.01209	5.26485	5.79699	5.35338	5.5535	6.55776	6.41639	5.74956	4.805	6.23395	4.49099	5.48328	4.64327	5.83886	5.53883	5.50268	5.37676	5.87546	5.94459
SEL1L	3.20594	3.66647	4.20913	4.48851	3.79734	3.62493	3.55265	3.77711	4.68161	3.43152	3.04344	2.86185	4.60241	4.59372	3.97618	2.98452	3.80328	3.55494	3.3987	3.81095	3.22956	4.05845	2.95639	4.20367	3.21368	3.65704	4.03844	3.7042	3.18653	3.55006	3.55421	3.6782	4.20769	3.00622	3.79921	2.77124	4.85487	4.39429	3.55441	3.62136	4.31259	4.34603	3.7758	3.12241	4.23376	3.64934	4.0871	4.11399	4.25067
SEL1L2	0	0.0063012	0.0195953	0.0963449	0.00474818	0.00652157	0.204721	0.0262718	0.0177515	0	0.053414	0.013061	0	0.0085426	0.462235	0.00602561	0.623992	0	0.198726	0.0719056	0.00661887	0.0326878	0.060503	0.081544	0.0085256	0.0329725	0	0.0220274	0.0109039	0.0168974	0.00376493	0.0149072	0.0953138	0.0178137	0.0151204	0.0458029	0.00502327	0.0287406	0.140495	0.0453348	0.00482279	0.0166404	0.0295654	1.50565	0.00501809	0.719393	0.0242608	0.0128319	0.0171361
SENP8	0.530184	0.335084	0.790185	0.627279	0.667359	0.30506	0.547199	0.464816	0.525436	0.611166	0.713256	0.567606	0.440925	0.759863	0.67069	0.457715	0.505652	0.434447	0.815796	0.612176	0.712376	0.831226	0.352601	0.690162	0.377232	0.569675	0.787509	0.730654	0.445656	0.560931	0.418438	0.432033	0.713068	0.550912	0.474637	0.602481	0.616368	0.754261	0.620835	0.322049	0.540581	0.424348	0.745754	0.787574	0.878044	0.617753	0.348937	0.522668	0.562097
SGTA	4.78324	4.46498	4.86352	4.9856	4.10825	4.40402	4.72492	4.88046	4.51917	5.26255	4.68706	4.40976	4.17203	4.56104	3.79633	4.21748	4.41641	3.73826	3.99334	4.75681	5.25143	4.66254	4.03179	3.37799	4.83239	3.96882	4.5689	3.87129	4.77634	3.9458	4.06664	4.77119	4.07201	4.36691	4.96306	4.62228	3.79018	4.12197	3.90217	4.28626	4.27937	4.22965	4.01546	4.26717	4.79476	3.84485	3.66088	4.27899	4.37489
SGTB	1.16406	1.43175	0.938935	1.78766	0.751774	1.11224	1.02529	2.13377	1.32287	0.450989	1.07508	0.848731	0.953375	1.64564	2.13125	0.850546	1.8045	0.701415	2.23587	1.41787	1.15532	2.90758	1.12015	1.88166	1.05334	0.400793	0.926619	1.73159	0.803966	1.14925	1.15748	2.0223	1.79772	2.21586	1.23428	1.00639	1.79198	1.69265	2.09902	0.87221	0.955305	0.877204	2.12025	0.91433	1.19103	2.05106	1.81692	1.45504	2.05157
SH3RF1	3.78091	2.61943	3.78256	3.87738	2.87096	3.36489	3.37046	3.5469	3.50867	4.2679	2.17045	2.62503	4.04013	4.10267	2.76839	3.66584	3.85031	2.94974	2.43903	3.39107	2.98548	2.50033	2.7446	2.87205	5.5414	3.11228	3.30074	3.45923	3.07859	3.45616	3.93594	3.76534	4.37004	3.39385	3.39168	4.08354	3.43476	3.32339	2.06757	4.48402	2.56246	4.33215	1.79732	2.55203	3.12782	2.36716	3.25437	5.05985	3.81126
SHPRH	0.239758	0.564701	1.05319	1.10487	1.37773	0.855719	0.847271	1.07555	0.938152	0.735814	0.40613	0.510536	0.969602	1.22442	0.881958	0.371862	0.91712	0.434474	1.00308	0.643179	0.0431759	1.14591	0.642165	1.10373	1.17312	0.453226	0.811499	0.7602	0.585331	0.712142	0.694236	0.933832	1.0738	0.585627	0.900703	0.249452	1.03021	1.14846	1.01575	0.666304	1.91839	1.25341	1.03149	0.914689	0.462876	0.862846	0.981105	0.660289	1.04147
SIAH1	1.32038	1.2342	1.60672	1.57151	1.28539	1.52545	1.40295	1.46379	1.72351	1.11087	1.70593	2.06994	1.35337	1.64616	1.68412	1.11766	1.76467	1.45532	1.33035	2.27336	1.49936	2.07138	1.29509	1.19794	1.26307	1.44486	1.87989	1.47822	1.89569	1.44799	1.46292	1.38385	1.8483	2.37137	1.52008	1.45589	1.50855	2.04476	1.49026	1.32023	1.70349	1.61367	1.47863	1.83019	1.6905	1.70701	1.45493	1.28664	1.58358
SIAH2	4.24885	3.78638	3.62826	3.75417	5.30343	4.48691	3.97965	3.73276	4.33505	4.30467	4.42117	3.49113	4.42092	3.94919	3.90887	4.04695	4.8208	4.50977	3.56232	3.8435	4.29157	4.35192	5.37521	3.54507	3.52394	3.43008	3.7775	3.16037	4.64386	4.52222	3.89153	4.1722	4.4998	4.24065	4.06261	3.84781	3.97141	3.27917	3.64877	4.32045	4.33364	4.00782	3.66213	3.5239	4.18131	4.05457	3.7287	4.05194	4.23001
SKP1	4.11693	3.56594	4.25564	3.18758	2.7757	3.53581	3.50999	3.19415	3.76097	3.40759	3.66717	3.87829	3.24689	4.17726	3.92896	2.60741	3.63805	3.98004	4.58213	3.80572	4.06246	3.41235	3.5751	4.1253	3.22196	3.48065	4.12556	3.98121	4.36065	3.63863	3.28594	3.70397	4.36047	3.5313	3.49927	3.35811	4.56891	3.98624	4.31289	3.62385	3.39293	3.55106	4.19796	3.25083	3.0413	4.06964	3.28437	3.3428	4.17034
SKP2	3.38055	3.4038	3.95324	4.19241	4.25625	3.69938	4.00841	4.52473	3.9016	3.60422	2.7697	3.74911	3.75149	3.93731	1.72088	3.70258	3.41151	3.30056	1.5306	4.06029	4.92773	5.31219	2.35982	1.45746	3.18292	1.56267	3.93363	2.49794	3.36457	2.99142	2.81639	2.76703	3.68314	5.41722	3.64142	3.23354	2.06145	3.63863	1.4054	2.15521	2.98019	3.60081	1.40909	3.83253	3.4374	2.78082	2.55716	3.02981	2.69417
SMAD1	1.81029	1.93373	2.48789	2.52603	2.25737	1.66838	1.82834	2.17473	2.04454	2.14231	1.71978	0.986591	1.62925	2.47548	2.33761	1.37663	1.65003	1.4745	2.00149	2.07414	2.4436	1.94038	1.83181	1.74791	1.79494	1.41145	2.37559	2.0783	1.47143	1.96645	1.47814	2.16152	2.14352	1.66566	2.1397	1.31046	2.52519	1.69922	1.82297	1.68184	2.05291	2.01377	1.85251	1.39653	1.46368	2.00181	2.42046	2.78596	2.6493
SMAD2	0.955408	1.29069	1.84497	1.90563	1.96301	1.71288	1.40928	1.95531	1.70652	1.5273	1.2645	1.62953	1.28646	1.94741	1.57742	1.14408	1.88735	1.02637	1.79163	2.05461	1.86793	1.21186	1.54254	1.60974	0.941178	1.27998	1.72746	1.56857	0.919693	1.53103	1.37897	1.29531	2.55378	1.56133	1.92458	1.21871	1.94827	1.54614	1.84148	1.14271	1.51387	2.38109	1.84681	1.23572	1.25405	1.5703	1.74067	1.44458	2.11139
SMAD3	3.98768	2.40452	3.34783	3.50829	4.05775	3.45862	3.61774	3.57963	3.40502	3.40905	3.09064	2.1782	3.87797	3.31619	2.5721	3.4477	3.45379	3.33479	2.68661	2.59248	2.49493	4.45294	4.22577	2.84652	4.35633	2.64651	2.81248	3.30694	3.22877	4.1781	3.38662	3.36858	3.99498	3.91759	2.76429	3.24021	3.01869	3.61568	2.75305	3.95907	3.72425	3.53185	2.5873	2.54617	3.25944	2.81633	2.7291	3.77136	3.53462
SMAD4	1.63623	2.0201	2.80866	2.55569	2.74584	2.45278	2.07364	2.78498	2.79868	2.18922	2.10899	2.31927	2.10588	2.85981	2.67417	0.688796	2.66726	0.378664	2.86256	2.08555	2.57682	2.13388	1.91689	2.73029	1.60912	1.72352	2.50755	2.48139	0.258789	2.22179	1.30463	2.18442	2.97662	1.97983	2.70196	1.68541	2.50314	1.93822	2.72084	1.98656	1.43648	2.88017	2.98202	1.63959	1.72594	2.60302	2.54807	2.1566	2.62136
SMAD7	2.55742	2.64162	0.994689	3.24061	3.21923	2.7293	1.92708	3.00049	2.90296	3.03086	2.87414	1.13691	2.40339	2.89011	2.64642	2.34403	2.58603	1.27107	2.43098	2.85079	2.20439	2.93995	1.7583	1.82073	3.3157	2.89389	2.32365	2.31075	1.01834	2.34766	2.0417	3.26018	2.61138	4.04479	2.87503	2.72019	2.29293	2.7199	2.69149	1.99598	2.49462	2.66365	2.07636	2.09232	1.87086	2.59838	3.02498	2.50005	2.97605
SMURF1	3.44192	3.16112	2.75231	3.49252	3.61872	3.32864	4.41759	3.61965	3.90542	3.64852	2.54312	1.99857	5.55826	3.5146	3.33536	3.44518	4.028	3.47727	2.49191	3.14718	2.86238	3.32511	3.68545	2.74217	5.1619	2.65059	2.42752	3.45348	3.85479	3.96113	3.83804	4.22282	3.43037	3.91734	3.01802	2.76931	3.24307	3.11407	2.65122	4.19581	4.67585	4.22781	2.66187	2.65237	3.12819	2.89905	3.70137	3.92375	3.30702
SMURF2	2.36452	1.76795	2.46391	2.7654	2.88199	2.43933	3.27045	2.47022	2.54272	1.97489	2.20029	2.01176	2.77333	2.68432	2.82318	1.95236	2.57131	1.87171	2.36391	3.09498	2.35703	2.12667	1.59359	2.44724	2.15196	1.88088	2.16726	2.60405	1.86116	2.56166	2.76211	2.73386	3.15808	2.67107	2.28858	1.96455	3.08721	2.28357	2.54032	2.53612	2.70839	2.51898	2.56472	2.58332	2.38801	2.6805	2.76481	2.37152	2.61704
SNX3	6.29002	6.39395	5.85078	6.02543	5.84808	6.03318	5.51799	5.95199	6.17852	6.11969	6.34867	6.09357	6.10238	6.05118	6.34771	5.3546	5.95765	6.36469	6.67534	6.10164	6.13162	5.72355	6.62181	6.30793	6.02666	5.8864	6.75606	5.76893	6.37756	6.21785	6.21919	6.88613	6.60856	6.62664	6.21609	7.34035	5.99434	6.6524	6.54429	6.0243	6.28244	5.9565	6.70924	5.5825	5.54983	6.36763	5.48463	5.78234	6.89172
SOCS1	4.54417	5.31132	4.32908	4.1259	1.57818	2.23234	2.68938	3.2262	2.01162	2.12814	4.80962	3.69563	2.59226	3.52915	2.88697	5.13085	3.86954	3.55528	2.81944	2.03284	2.46078	3.05978	2.71205	2.72353	1.66898	3.44077	3.65164	2.81489	2.09064	3.10145	3.35583	3.39618	1.47284	3.66333	3.85754	3.22836	2.2939	2.20105	2.51611	2.00946	2.87752	2.5269	2.16326	3.37019	3.27385	3.00707	3.2275	4.42112	3.48719
SOCS3	5.02159	5.47283	4.37116	6.13028	4.71127	4.5659	4.95563	5.78548	3.72025	4.81919	5.57573	3.73982	4.58426	4.47972	6.22893	5.79858	5.69353	4.10968	6.11653	2.87348	3.6954	3.03374	5.96829	3.61163	4.40339	2.9662	3.94727	5.13686	3.67157	4.56039	5.1826	5.76904	3.5673	5.31483	5.37389	5.33267	5.57851	3.83366	7.40717	6.34392	4.40457	5.64188	5.84347	3.87854	6.69684	3.04873	7.4676	4.78573	6.3958
SPSB1	3.94201	4.23269	3.43892	4.01164	2.99427	3.38615	3.34262	4.99211	3.32462	2.7815	3.65308	3.33918	2.63305	4.10321	4.39267	3.86931	3.85609	2.41415	3.4616	3.54101	3.9881	3.75466	4.12396	4.1773	3.44539	1.96924	3.12117	3.30466	2.46354	3.92977	3.05275	5.25399	2.58479	5.36013	3.91008	4.30841	3.93391	4.00711	4.27618	3.25734	3.91049	2.51025	3.60254	3.09405	3.20354	4.33865	4.86737	2.55812	3.66563
SPSB2	1.92835	1.39473	1.50376	2.78431	1.54936	3.50445	1.46938	1.75171	2.07425	1.55099	1.67514	1.34562	2.34112	1.60249	1.49303	2.73734	2.64073	2.9438	1.42989	2.32395	1.30955	2.60883	1.03406	1.12773	1.36321	1.66017	2.38964	1.93621	2.92895	2.21961	2.1863	2.25657	0.94349	2.36526	2.39692	1.88214	2.23319	2.17183	1.53417	1.98481	2.13225	2.01317	1.7247	3.6793	2.61527	1.89077	1.82642	2.4816	1.11748
SPSB4	0.0240747	0.10739	0.0253861	0.27641	0.0675418	0.0856505	0.0282746	0.244259	0.0456426	0.0404538	0.101306	0.0491144	0.0721415	0.103007	0.288199	0.0733517	0.402564	0.0305245	0.245987	0.0986383	0.047438	0.275269	0.0421571	0.0791055	0.0307502	0.017215	0	0.0839509	0.00567217	0.0520048	0.0462312	0.161759	0.124118	0.0989093	0.0312299	0.0805591	0.204308	0.110236	0.661977	0.00953399	0.0923036	0.025839	0.677151	0.83335	0.0258686	0.190733	0.234028	0.0396076	0.228037
STAM	3.09676	3.99909	4.06814	3.41029	3.26587	3.67797	3.53879	3.27366	3.35929	3.34994	2.58416	2.90131	3.43497	3.33264	2.86778	2.68789	3.91175	2.80593	2.8439	3.26862	3.75676	3.2991	3.73883	2.88325	4.21134	2.68296	3.36806	2.95107	3.79885	3.50245	3.26325	4.01676	4.03722	4.10498	3.3509	3.14058	2.89362	3.8413	2.81139	3.68954	3.32812	3.74895	2.90376	3.64824	3.2449	2.99682	3.18336	3.78562	3.79631
STAM2	2.36561	2.16828	3.05638	3.11161	2.51312	2.46413	2.72441	2.94995	3.17605	2.71857	2.19789	2.61308	3.09723	3.56821	2.81998	2.08629	3.05863	2.44994	2.85117	2.5502	2.98869	2.79672	2.74117	2.92782	2.53759	2.51365	3.19695	3.06824	3.03368	2.90303	3.08067	2.9168	2.88304	3.19502	2.74909	2.62562	3.14028	3.32401	2.79057	3.08706	3.0129	3.36338	2.86838	2.2289	2.86293	2.89583	2.83479	2.82235	3.30571
STAMBP	2.67466	2.30257	3.01111	3.27186	2.68832	2.94551	2.98188	2.50152	2.93947	3.09055	2.41508	2.37511	3.11098	2.7414	2.19442	2.84121	2.90077	2.72748	2.55515	2.90727	3.36768	3.32848	2.97713	2.02186	3.33371	2.38954	2.93938	2.86124	2.52892	3.17482	3.03606	2.81102	2.99291	3.09891	2.74994	2.18451	4.04121	3.54923	2.29535	2.53678	2.53558	2.83387	2.14078	2.77531	3.0007	2.5335	2.0827	2.8602	2.83413
STAMBPL1	1.58365	1.21089	2.42891	2.25567	0.649867	1.37555	1.11658	1.43538	2.04527	1.96507	1.39238	1.11977	0.896352	2.19609	1.06128	0.670218	1.58372	1.03548	0.728587	1.93061	2.55882	2.1078	0.414938	0.616744	1.96947	0.693966	1.4253	1.93753	0.285735	1.45251	1.26957	2.46613	0.924323	1.20478	2.54138	0.991247	0.973893	2.10767	0.64873	1.54292	1.79335	1.4915	0.608882	2.20761	1.00428	1.7152	1.30259	1.37531	0.951293
STT3B	4.81043	5.39964	5.44543	5.38375	6.52792	4.7286	6.26069	4.90862	5.39866	4.86623	4.36282	4.78117	4.51141	5.19425	4.62889	4.59346	5.13028	5.48634	4.00464	6.82135	5.83397	4.74974	4.44888	4.32268	5.14164	4.32894	5.37503	4.86806	5.00877	4.81983	5.37741	4.43008	5.80037	4.6914	5.56307	4.28686	5.78884	5.13333	4.04443	5.44573	4.98878	6.04043	4.18405	4.5896	5.14391	4.5076	5.00444	5.13643	5.5704
STUB1	4.34679	4.33232	3.94614	4.37974	3.43102	4.41728	4.06501	3.32328	3.39215	4.53769	4.2452	3.14971	3.3725	4.00262	3.49005	4.61634	4.5595	3.56803	3.8826	3.82982	4.15097	4.75207	4.06022	3.49217	3.01206	4.02116	4.44778	3.77212	3.37884	3.29742	4.54177	4.11542	3.49834	3.94997	4.17866	4.02558	3.9044	2.17293	3.96751	4.01255	3.50954	3.76783	4.04405	2.62547	4.41197	3.36872	3.23719	3.8171	3.91561
SUDS3	3.05038	2.82825	3.67993	3.42534	3.76372	3.47453	3.77844	3.26019	3.26433	3.30992	2.72045	3.29055	3.59753	3.79907	3.04186	2.79898	3.61653	2.93402	3.27687	4.02319	3.86543	3.69151	3.19477	2.91544	3.28758	2.67219	3.97079	2.91213	4.3837	3.25689	2.53849	3.20209	3.40008	2.85416	3.5135	3.24285	2.71572	3.22133	3.0943	3.41294	3.56595	4.08476	3.44207	3.66516	2.49392	3.0767	3.06393	3.31191	3.23674
SVIP	3.07414	2.82166	2.85887	2.2841	2.20867	2.77353	3.71501	2.83207	3.07636	3.04404	2.62419	3.716	3.01931	3.67987	2.53324	2.53372	3.71511	3.21495	2.62882	3.6119	3.70452	3.41176	2.37761	2.1371	1.84463	3.23433	3.56661	2.7101	3.04301	3.00607	2.96267	2.60816	3.20145	3.11902	3.07074	2.95872	3.66019	2.45534	2.34689	3.23893	2.63152	3.38803	2.47222	2.9074	3.94145	2.83836	1.90238	2.49864	3.14246
SYVN1	4.34168	4.53188	4.36212	4.89056	4.79294	4.05512	4.38026	4.38585	5.25432	4.47852	4.7134	3.73973	4.58127	4.68105	3.96553	5.09859	5.09478	4.2936	3.91549	4.48259	4.49413	4.69244	4.45139	3.62262	5.42285	4.36891	4.25934	4.14085	3.79336	4.45763	4.3218	4.61546	4.17475	4.61651	4.91062	3.82275	4.85387	4.62368	3.82874	4.6062	4.18483	5.21843	3.82591	3.66622	5.04303	4.23266	4.45655	5.01234	3.95405
TAB1	2.77748	3.05421	2.81563	3.02739	3.6795	2.87543	2.62749	2.81496	2.50401	3.11662	2.96533	2.42998	2.63	3.0466	2.65995	3.84941	2.9012	1.88445	2.7211	2.58587	2.92169	2.84574	1.97243	2.39161	3.27757	2.39002	2.07309	2.72953	2.1512	2.11341	3.15288	2.63707	2.29898	2.41752	3.08898	2.62983	3.0161	2.90616	2.59584	2.38817	2.98234	2.78295	2.90728	2.24237	2.69235	2.46541	2.24391	2.72055	2.69421
TADA2B	2.56148	2.82517	2.53322	3.0271	2.00613	2.2623	2.31627	2.56517	2.96876	2.77143	2.73777	2.29025	2.69905	3.25823	2.73857	3.02505	2.51781	2.3695	2.96257	2.9218	2.93043	2.42731	2.30053	2.73708	2.27977	2.57318	2.64659	2.51346	1.36249	2.33351	2.39196	2.45826	2.29927	2.56578	2.57742	1.98298	2.7586	2.01782	3.05546	2.63355	2.88033	2.81035	3.06025	1.91076	2.88362	2.60257	2.4995	2.77514	2.64828
TADA3	4.65442	4.34639	4.29328	4.59196	4.74604	4.5143	4.15301	3.56144	3.2997	4.70543	4.6579	3.70437	4.03241	4.41179	3.92578	4.89721	3.9575	4.22813	4.11973	4.01206	3.68927	4.20814	3.75189	3.77527	4.24167	4.4409	4.0184	4.19681	4.73546	4.33275	4.34774	4.56847	4.03708	4.89519	4.11604	4.34833	3.94829	4.62902	4.01421	4.14381	3.88794	4.21821	4.07361	3.51337	4.9905	4.05503	3.66057	4.17596	4.33246
TAF10	4.3672	3.99076	3.80016	3.60711	3.12095	4.25388	2.96245	3.3242	3.62018	3.40074	4.2742	3.19454	3.95405	3.50321	3.17372	4.0204	4.04879	4.44143	3.25033	3.34915	2.65799	3.84094	3.48622	3.15137	2.6466	4.27345	4.24978	3.27429	4.07373	4.32834	4.10202	3.63714	3.62816	4.65664	3.73158	4.7049	4.03802	4.49383	2.94934	4.03432	2.39386	2.95864	3.17776	3.744	3.58533	3.71321	2.71945	3.8606	3.91892
TAF9B	2.80074	4.02316	3.01168	3.09047	4.33754	2.59398	3.53382	3.54367	3.86768	2.94493	2.60143	2.5119	2.46018	2.93991	3.81335	2.35226	2.73882	2.90638	4.67281	2.77723	3.81557	4.92083	3.08801	4.02007	3.7074	2.11428	2.72142	3.48915	2.71224	2.75937	2.18673	3.33232	3.22515	3.01437	2.63114	3.00167	4.17406	3.77447	4.04478	2.63893	3.20912	2.70695	4.3115	2.56989	2.70657	4.0126	2.85782	2.64308	3.72663
TFPT	4.10636	4.19291	2.59031	3.33419	3.01498	2.94319	2.77612	3.06707	2.84697	3.46963	3.32373	2.84044	3.63863	3.00568	2.6616	3.56421	4.24657	3.57285	2.45198	2.99816	2.7009	4.0583	2.45984	2.20743	2.05842	3.34484	2.36555	2.86809	3.2616	2.72445	5.39896	3.68402	1.97743	4.34632	2.87719	3.60035	3.52344	3.7991	2.46179	3.62747	3.24087	3.21489	2.67208	4.00824	3.25482	2.60622	3.24453	3.69478	3.04496
TGFB1	5.13463	6.01848	3.90376	6.37819	3.60208	4.30729	3.26372	5.69985	4.3764	3.38601	5.98146	3.72202	3.84807	5.32688	4.89939	5.38233	5.4174	3.66265	4.55939	4.44768	4.99347	4.56713	5.79076	4.53631	4.29475	4.24347	3.9216	4.86853	4.05884	6.36306	4.63077	6.08558	4.76694	6.848	4.78695	5.1261	4.32304	4.68696	4.38312	3.80813	4.66724	4.17559	4.81971	2.92673	4.15799	5.28079	5.75626	4.55586	5.75079
TGFBR1	3.20825	3.85635	2.90195	4.13646	4.03865	3.45849	2.62066	4.56741	3.09996	1.70075	2.69388	3.06967	2.91134	3.66024	4.70311	2.5177	2.54758	2.12899	2.82637	3.6036	2.79374	3.85466	2.72035	4.54752	3.98995	2.06175	2.62554	3.29744	2.2987	2.88721	2.98996	3.52527	3.34961	2.7706	3.21986	2.75617	4.14102	4.41483	3.75802	2.68753	3.05953	2.55706	3.47531	2.86511	2.16991	4.77896	4.80035	3.05944	4.39313
TGFBR2	5.54349	4.7676	3.52932	5.30978	6.02734	5.72011	6.40212	5.36916	5.33288	2.71164	5.57984	2.021	4.86523	5.19946	5.66187	4.1654	5.59917	4.74023	6.19588	4.53377	3.89909	4.58414	4.98548	5.45367	5.16237	5.12241	2.99518	5.60297	6.26279	5.0947	4.73799	4.92632	3.94404	5.49433	3.66878	4.03113	5.01842	4.95625	5.95026	5.21467	5.11721	4.94842	5.58519	3.73184	5.58541	5.30056	5.52639	5.22085	5.74231
THOP1	3.06608	2.44885	3.17678	2.95535	2.5793	2.93404	3.22254	3.10206	2.94878	3.44918	2.97575	4.40733	2.31932	3.09144	2.03873	2.54365	2.63979	1.95589	2.16024	3.96445	4.20319	3.05172	2.31095	1.62284	3.78379	1.81567	3.47529	2.62478	2.80831	2.35087	2.31417	2.96499	2.29901	2.38986	3.8512	2.76058	1.96964	1.84161	2.02407	2.83852	2.91944	3.27649	1.88378	3.27039	3.08175	2.19287	2.22972	2.90586	2.27798
TMEM129	3.71195	4.10896	4.08272	4.25659	2.82721	3.41551	2.57093	3.69554	3.74062	4.61343	4.23474	3.45702	4.16461	3.96556	3.52031	4.59713	3.23589	3.54767	3.84573	3.71682	4.84992	3.75242	3.63105	3.30198	3.14325	3.3935	3.56442	3.95508	2.42731	3.50201	3.60658	3.37738	2.87984	3.60692	3.95164	4.10373	4.0807	2.00222	3.70792	3.12246	3.84216	3.62449	3.87685	2.78397	4.29922	3.52008	3.30663	3.82593	3.52228
TMEM67	0.552007	0.555956	0.755227	1.37439	2.20198	1.75838	1.11952	1.3284	1.79586	1.19582	0.271703	0.652207	1.33207	0.863088	0.940342	0.635596	1.6061	0.734615	1.10452	1.26675	0.119383	0.968344	0.480332	0.762468	0.82151	0.508808	1.30065	0.894311	1.0907	1.00409	0.650673	1.01767	1.28145	1.03587	0.829827	0.665149	1.50195	2.00039	0.940055	1.04896	1.51101	1.32452	1.08281	2.74718	0.985897	0.969039	1.37339	0.839859	0.849123
TMUB1	5.45057	4.74111	4.65759	4.74204	4.6412	4.81103	5.12783	4.35172	4.63105	6.52742	5.21879	5.53292	5.4463	4.99032	3.73388	6.38616	5.13445	5.57977	3.66914	4.88036	5.29757	5.02121	4.68609	3.22625	4.22443	5.08006	5.21067	4.57965	5.00968	5.34084	4.30558	5.04254	4.28446	5.32976	5.15715	5.44445	2.9504	3.03618	3.71404	5.24598	4.23856	5.12681	3.95438	4.47105	5.13919	4.0692	3.79196	4.57351	4.58986
TMUB2	3.35408	3.76651	3.61487	3.32837	4.89878	3.69973	2.79779	3.61005	3.15475	3.10658	3.34759	2.96425	3.5824	3.39366	3.12377	2.97314	4.19336	2.58765	3.09256	3.74311	3.43668	2.69033	3.27515	2.76239	3.52609	2.64511	2.59175	3.14019	4.01298	3.53227	3.2807	3.89565	3.06766	3.66045	3.65142	2.98508	3.91674	3.76254	3.17731	3.04747	3.58426	3.37725	3.22903	3.47091	3.92343	3.17272	3.14188	3.52182	3.20833
TNFAIP3	3.95989	3.07758	3.9771	4.54161	4.04162	3.5122	3.27348	4.24302	3.33372	3.1256	4.44978	2.69554	4.62031	4.55488	3.71728	5.64589	4.63037	2.70878	4.03228	1.90214	2.10758	2.71102	3.28315	3.16289	3.1609	2.73014	3.00515	3.62108	2.48542	3.23651	3.33172	5.05576	3.19665	3.02187	4.62911	2.8539	4.986	4.2106	3.59885	4.23353	4.25948	3.9132	4.34846	3.86306	3.26513	3.75209	6.84978	4.5765	5.36564
TNIP1	5.20914	5.01579	4.92792	5.00521	4.58576	4.70598	4.35962	4.23003	4.56037	5.04025	4.79186	4.13326	4.96764	5.56104	4.08373	4.2311	4.88121	4.41539	3.65054	4.44234	4.43858	3.82006	4.21496	3.67134	4.6403	4.81297	5.04498	4.53501	5.00608	4.47356	5.00643	5.19171	4.43214	4.42024	5.15633	4.11407	4.46005	4.32835	3.78538	4.93123	4.4007	5.17899	3.61122	3.97342	4.84001	4.21149	5.46551	5.10447	5.05957
TNIP2	4.06971	3.40021	3.69363	3.77487	3.01416	3.48423	3.27184	3.37415	3.31681	4.13241	3.85747	3.99686	3.55254	4.0657	3.42818	4.29354	3.13575	3.34315	3.26018	4.21004	3.61636	2.95708	2.82578	2.78249	3.56476	3.15477	3.56102	3.66258	2.54003	3.45047	3.3554	3.66046	3.0761	4.36396	4.32105	3.61919	3.8308	2.9357	3.06106	3.36993	4.06283	3.56521	2.85005	3.23792	4.00583	2.99314	3.77895	3.58268	3.64388
TNIP3	0.548039	0.100563	0.424202	0.696808	0.135594	0.310935	0.263486	0.221908	0.106441	0.135917	0.372248	0.169912	0.144285	1.03983	0.316841	0.634333	0.648865	0.339486	0.192832	0.167247	0.185814	0.0611627	0.29354	0.188857	0.0813939	0.2661	0.228692	0.11009	0.170084	0.211475	0.519697	0.249922	0.363221	0.376016	0.688663	0.149587	0.560306	0.598717	0.174868	0.165751	0.29202	0.333528	0.0645144	0.654043	0.290046	0.275531	1.50891	0.845262	0.599156
TNKS	1.59809	2.26779	2.60203	2.82206	2.82297	2.3165	2.33453	2.52026	3.11164	2.46651	1.77686	1.95637	2.71758	3.0035	2.14743	1.11081	2.13249	1.89425	2.28268	0.802318	2.67007	1.96801	1.71718	2.19236	2.41378	1.38452	1.68275	2.43629	1.70852	1.74756	1.64213	2.07531	2.99297	2.21404	2.40939	1.29779	2.12166	2.70317	2.05957	2.16276	3.17123	2.57794	2.15533	1.65161	1.38422	2.16334	2.93962	1.68204	2.62286
TNKS2	3.18353	3.35408	3.64028	4.07412	4.15625	3.60093	3.3837	4.05858	3.76111	2.83027	3.015	2.98875	3.26595	4.04511	3.73519	2.21194	3.78865	2.67445	3.54631	3.77544	2.65861	4.27746	4.03564	3.66917	4.09984	2.80607	3.4259	3.53132	3.67424	3.56236	3.29216	3.62801	3.98559	3.35177	3.27237	2.70688	4.37655	4.05331	3.57313	3.49341	3.87593	4.09254	3.50509	3.33534	2.53726	3.42268	3.78626	3.62421	4.17488
TOMM20	4.3557	5.053	6.18814	5.95293	6.30238	6.03754	5.30997	5.78889	6.87332	5.76176	5.2143	6.08855	5.64289	6.12506	5.02593	4.59693	5.6503	4.98776	5.22925	6.68	6.25472	6.06674	5.19908	4.84252	6.53427	4.94778	6.54048	5.12751	5.92023	5.04439	5.90939	4.66954	6.38795	5.22441	5.68538	5.65751	5.81442	6.45128	5.26626	4.83784	5.79825	5.23213	5.29853	5.52136	5.19385	5.1025	4.9557	5.74991	5.77758
TP53	5.60732	3.40214	5.77385	5.47776	4.78218	2.33388	5.82365	3.3882	2.6276	4.97471	4.86377	5.7709	4.26422	4.44945	3.82187	5.22203	4.37252	4.57396	3.58664	4.77032	5.66677	5.34755	4.13867	3.52941	4.11832	3.17837	5.50214	4.19078	5.3799	4.30986	2.32247	4.7442	5.12385	3.11784	5.56692	5.73997	4.1182	1.93187	3.09613	3.51673	3.44882	4.49801	3.14495	4.89871	4.98299	4.24258	4.10873	4.57386	4.31269
TPP2	3.38776	3.70523	4.12699	3.32261	4.34253	3.45051	3.64992	3.41584	3.85079	2.41956	2.5036	3.18308	3.15528	3.4851	2.82556	2.31258	2.57479	3.13403	2.83589	3.60245	2.64034	2.49685	2.36533	3.14015	2.66118	2.01625	3.57824	2.80928	2.67131	3.21751	2.76022	3.17345	3.77503	3.44035	3.49966	3.0683	3.07856	3.87997	2.8475	3.1243	4.39414	2.83211	2.89562	3.27556	2.24001	3.0344	3.06068	3.57199	3.02039
TRAF2	3.25124	3.89236	2.50034	2.90003	3.66152	3.39527	2.86965	3.49595	3.2785	3.27306	2.79057	2.41579	3.03016	3.05393	1.8411	4.15611	3.49384	2.08851	1.35682	3.16657	3.01865	2.95363	1.67808	1.66839	3.50271	1.9004	2.48002	2.42548	2.51247	2.2472	3.22383	3.63594	2.27158	3.09345	2.98258	3.06749	2.59211	2.71931	1.31861	2.93952	2.66529	2.99152	1.40922	2.99442	2.63272	2.33365	2.84006	3.52724	2.72909
TRAF3	2.54822	2.51755	2.69093	2.76819	2.98246	2.45324	2.42775	2.55547	2.9843	2.49846	2.83118	2.01157	2.79812	3.35496	2.88923	2.01488	2.47747	2.5416	2.27285	2.82363	2.70064	3.41952	2.03573	2.96828	1.71628	1.67338	2.55984	2.98797	1.94727	2.29887	2.67794	2.50804	3.24155	1.90149	3.11127	1.90641	2.55761	2.36567	2.04442	2.24832	3.77944	2.44075	2.27377	2.59241	2.24112	2.80191	3.32049	2.80972	3.01617
TRAF6	2.15371	1.99175	2.77784	2.48653	2.0073	2.31803	2.49827	2.58144	2.668	1.73193	1.61259	1.73559	2.14146	2.64423	2.37511	1.64887	2.33462	1.95963	2.26209	2.3597	1.93482	2.60113	2.0894	2.29944	2.66994	1.7873	2.18076	2.31819	1.64867	2.11911	1.97435	2.72877	2.72607	2.06948	2.66708	1.62797	2.46452	3.38366	2.17313	2.05442	2.03558	1.88976	2.14935	1.62177	1.95956	2.47633	2.08404	2.16578	2.48393
TRAF7	5.15553	5.78985	5.14948	5.59618	5.45226	5.94444	5.23266	4.65304	4.59801	6.09111	4.59573	3.83429	5.2143	5.05133	3.98577	5.51119	5.53601	4.26024	4.03728	4.83898	5.06359	5.36748	5.09153	3.5718	5.41901	4.11035	5.17812	4.42136	4.50761	4.81951	5.03689	5.01736	3.84507	4.19368	5.20679	4.49279	4.79474	3.57268	3.87879	5.35199	5.30022	5.23331	3.9075	3.60923	5.10523	4.41519	4.62196	4.59265	4.43724
TRAIP	1.75375	1.30714	1.45935	1.69908	2.10305	2.02069	1.48136	0.874726	1.26744	1.97182	1.10733	1.48013	1.62134	1.5456	0.403631	1.99067	1.3146	1.70259	0.43465	2.14955	2.10819	2.12422	0.428178	0.288646	1.74538	0.857401	1.357	0.834227	1.65087	1.017	2.19143	1.49225	1.31325	1.06905	1.76177	1.26227	1.5076	1.88816	0.420285	1.48795	1.69777	2.33514	0.381595	1.82068	1.65461	0.666547	0.784635	1.51653	1.5333
TRIM11	2.56266	2.23551	1.98138	2.69748	2.94792	2.761	2.7283	2.21061	3.11443	2.49828	2.13686	1.74885	2.92302	2.5616	1.52034	2.38153	2.56563	2.10291	1.19496	3.67657	2.26682	2.71476	2.21982	0.996083	2.67609	1.54802	2.34286	1.91675	1.89803	2.01774	2.71954	2.14816	1.74364	2.76907	2.47332	2.25977	1.71763	2.06863	1.18482	2.02455	2.68827	2.45008	0.953107	2.45619	2.2253	1.39077	1.97111	2.53165	2.0137
TRIM13	2.10691	1.86752	2.75282	2.31561	3.52534	1.7807	2.48465	2.29006	2.82993	1.6021	2.17133	2.38888	1.74471	2.25174	2.23501	2.01434	2.47303	2.1608	2.10289	2.60914	1.88365	3.85392	2.17136	2.28074	1.62017	1.61157	2.63897	2.21658	2.33936	2.26982	1.21811	1.75412	2.51902	2.60037	1.93519	1.85707	1.69971	2.19494	1.72402	1.53514	2.27995	2.15034	1.89967	2.42093	1.79374	2.47912	2.23894	2.77864	2.25229
TRIM21	4.9473	3.81277	4.14509	3.94556	2.59565	3.90848	3.55578	3.42929	4.27866	3.85146	3.9476	4.45361	3.41904	4.40373	3.03674	3.59375	3.64726	4.64292	3.24888	3.82921	3.4361	3.09362	2.23222	2.61731	3.54607	3.37564	4.55514	3.79243	2.82835	3.31022	3.82842	4.95012	3.03181	3.65116	4.59866	4.03338	2.69082	3.80368	2.84518	3.6228	3.16823	3.53446	2.86336	3.73026	3.3679	3.37417	2.66456	4.60527	4.42837
TRIM25	4.13264	3.07237	3.34978	3.26974	4.43735	3.16037	3.76046	3.55024	4.33685	4.19024	3.11129	3.18758	4.22633	3.88175	2.87351	3.44734	3.09929	4.02064	2.47322	3.74569	4.43946	3.78197	2.61579	2.57592	4.2591	3.41658	4.42095	3.65919	3.49961	3.66485	3.91444	2.49407	4.47643	3.59641	4.00084	2.80867	3.86669	3.3089	2.33575	3.86884	4.61334	3.30158	2.30743	3.13065	2.65739	2.75581	3.26695	4.60242	3.8305
TRIM32	2.3911	3.05852	2.85575	3.3518	3.77457	2.63388	2.85421	3.02832	2.50865	2.44383	2.31315	1.89259	2.11712	2.72554	2.4201	1.89116	2.44978	1.50891	2.37038	2.6	2.42126	2.24249	1.94146	2.27498	2.22413	1.59978	2.63282	2.35563	1.6913	1.82954	2.13811	3.4524	3.03153	2.32162	2.29728	2.07879	2.53755	3.11265	2.03917	2.01458	2.36825	2.34981	2.12175	1.85731	1.73893	2.53351	2.54355	2.18524	2.88445
TRIM36	0.733199	0.780338	2.331	0.960397	0.135462	0.451039	0.864713	0.464797	0.40328	1.60748	1.61881	3.04131	1.49438	2.44693	0.304664	0.306464	1.45304	0.740264	0.285634	2.12722	2.66666	0.111139	0.258861	0.116026	1.18569	0.169734	2.42682	1.56439	1.87691	0.14378	1.212	2.25609	0.481643	1.22893	2.31248	0.534032	0.646265	1.07877	0.349808	2.2093	1.57669	1.82045	0.33697	1.37695	0.314431	0.890598	1.17674	0.893084	0.84204
TRIM37	2.29374	2.43893	2.82714	2.89841	3.7424	3.33838	3.29848	2.49075	2.68571	2.40877	2.2336	2.38593	2.44433	2.92235	2.35707	2.01523	2.93022	2.01235	2.58883	2.82617	3.18214	3.01803	1.89041	2.82898	3.05282	1.56428	2.40616	2.42229	2.16277	2.21391	2.80014	2.74746	3.04754	2.30682	2.8952	1.99545	3.37136	2.38477	2.55305	2.08519	3.62195	2.79462	2.79035	2.74221	2.50916	2.55919	2.65063	2.41317	2.80535
TRIM39	1.09207	1.43388	1.37814	1.8319	1.86953	1.44125	1.3634	1.27873	1.86499	1.16181	1.44276	1.35784	1.8414	1.26633	1.61433	1.3176	1.51741	1.24034	1.67645	1.5274	1.15146	1.73283	1.34953	1.35043	2.28321	1.02182	0.993221	1.34957	1.38251	1.34344	1.04201	1.42228	1.58912	1.47724	1.85249	1.33369	1.84406	1.85985	1.54346	1.40857	1.85925	1.46428	1.70082	1.3854	1.45527	1.27206	1.39523	1.91661	1.4882
TRIM4	2.91965	2.50909	3.04085	3.21999	3.1552	2.18848	3.01323	3.26504	3.17155	3.08535	2.81856	2.72496	4.60603	3.08081	2.84751	2.59819	3.14603	2.63978	2.52038	3.01283	3.12788	3.40137	2.60831	2.38422	4.44181	2.65662	2.85866	3.09086	3.26216	2.55441	3.55851	3.3808	2.65881	2.61365	2.8767	2.59781	2.51875	2.60359	2.54457	2.21105	3.27885	2.90811	2.51215	2.39868	3.05586	2.76465	2.67204	2.73739	2.65976
TRIM41	1.50593	1.41926	1.24871	1.94242	1.55932	1.98044	1.67044	1.27523	1.63465	1.73618	1.48612	1.37298	2.08318	1.84321	1.41568	1.49283	1.75143	1.01305	1.22902	1.97978	1.86589	1.65026	1.46155	1.04813	1.15054	1.26883	1.77177	1.40278	1.34729	1.81398	1.8528	1.57522	1.22386	1.56555	1.94524	1.04535	1.47551	1.40097	1.19933	1.06848	1.44619	1.74381	1.28432	1.70839	1.99115	1.11015	1.63037	1.63376	1.31309
TRIM50	0	0.0292525	0.0153055	0.0508963	0.0366242	0.0302672	0.0588267	0.0318118	0.0207456	0	0.0359256	0	0.347242	0.3274	0.00569284	4.23891	0.906718	0.132714	0.188546	0.037834	0.0103112	0.957021	0.0932989	0.0429732	0.127569	3.90433	0.00795687	0.124322	0.0337479	1.52328	0.0233317	0.175824	0.155277	0.133429	0.0312713	0.175538	0.0156135	0.746688	0.183847	0.035479	0.18371	0.0129946	0.0714204	0.680293	0.41309	0.179749	0.957326	0.0100177	0.133455
TRIM63	0	0.0283181	0.00742618	0.143067	0.00716149	0.317545	0.0328269	0.143782	0.0333147	0.0197423	0.0575104	0.00658673	0	0.0445716	0.136824	0.280729	0.501671	0.0332453	0.455813	0.124328	0	0.00829382	0.0408701	0.0740493	0	0.210435	0.0456005	0.393452	0	0.0749877	0.022585	0.101874	0.0958992	0.0789695	0.0227641	0.0395944	0.0522153	0.448353	0.192777	0.0275435	0.0217127	0.043549	0.135176	1.0408	0	0.0545317	0.0219906	0.16527	0.0710803
TRIM69	3.13085	2.45927	2.33429	2.22404	1.5098	1.58859	1.72845	2.38145	2.40986	1.39614	2.3864	1.9215	1.98797	2.5161	2.66195	2.2642	2.39411	2.35844	2.60996	1.65838	1.64799	2.59806	1.62421	2.73031	1.52962	2.74697	2.36828	2.44292	2.03315	2.19088	1.90671	2.60196	1.61871	2.65553	3.55824	2.03242	1.67173	1.93955	2.7577	1.4847	1.86966	2.19707	2.84147	2.00675	2.91781	3.02487	1.34797	3.03271	3.26476
TRIM71	0	0.0168459	0.0455924	1.7363	0.11248	0.00874276	0.0602056	0.00131679	0.011932	0.00294151	0	0.00390637	0.0168906	0.00764302	0.081082	0.0107611	0.312664	0.328296	0.0649268	0.0512827	0.0088731	1.0068	0.00612759	0.00997011	0.00381894	0.00743847	0.00228573	0.00742568	0.31728	0.123755	0.008405	0	0.110246	0.0179238	0.00226407	0	0.00449372	2.23491	0.0218311	0.0325828	0.0107618	0.0185917	0.00571365	0.949327	0.0111966	0.131067	0.00654991	0.0028792	0.0122821
TRIM9	0.0334439	0.170491	0.0254733	1.05973	0.0646144	0.110595	0.0607817	0.204762	0.0920075	0.022692	0.18358	0.200051	0.0406616	0.341297	0.555774	0.01305	0.412605	0.0128413	0.59185	0.026434	0.00861595	0.145531	0.317179	0.594581	0.105571	0.0357577	0.0220413	0.314798	0.00711124	0.180152	0.0577568	0.239271	0.151487	0.0813294	0.0603208	0.10304	0.532841	0.672746	0.627104	0.120783	0.162499	0.062227	0.55713	0.51809	0.0785802	0.33599	0.728422	0.156317	0.568037
TRIP12	3.71056	3.41397	3.9272	4.3213	4.50041	3.55199	4.01324	3.98102	4.50209	3.29645	3.10531	2.68269	4.44703	4.07555	3.83811	3.25902	3.98805	3.37848	3.93443	3.72762	3.77814	3.79618	3.42283	4.14876	4.08851	3.03076	3.36041	3.79209	3.69386	3.90542	3.22838	4.11101	4.22962	3.6366	3.71462	2.91597	4.56236	4.82974	3.73777	3.89276	4.12247	4.28347	3.8219	3.01585	3.45985	3.6763	4.22007	3.92803	4.53099
TRRAP	2.97354	3.45406	3.22358	3.94678	4.03674	3.01848	4.15227	3.46815	3.81269	3.71727	2.76175	2.43234	5.0281	3.55069	3.35059	3.15348	3.62731	2.69535	2.98088	3.3632	2.87681	4.27187	2.47798	2.83889	4.91392	2.13859	2.90589	3.38633	2.7614	3.07951	3.40109	3.62885	3.33769	2.65868	3.47084	1.89018	2.97296	3.63712	2.96249	3.225	4.66051	3.99845	2.89197	2.45824	3.11971	3.07915	3.73803	3.57176	3.22712
UBA1	6.44102	6.75966	6.31216	6.03163	6.26075	5.84575	6.63035	5.86561	6.15106	6.33305	5.95742	6.24448	6.43346	6.05589	5.49254	6.72659	6.20411	6.67657	5.39303	6.50928	6.08082	6.08966	5.75735	5.19088	5.9305	5.52399	6.4194	6.03103	5.34737	5.85313	6.62051	6.86762	5.89086	5.39561	6.25926	5.7392	5.88063	5.38227	5.16175	6.29184	6.30299	6.67643	5.1572	5.1473	5.77285	5.8573	6.02632	5.59912	5.90282
UBA2	4.92661	4.11757	4.52312	4.73207	4.3717	4.26139	4.93325	4.46914	4.68996	3.41911	3.86617	4.09756	4.55101	3.79761	3.83219	3.82445	4.60367	4.91802	4.12879	5.07306	4.49772	4.70648	3.71777	3.84952	3.79344	3.12592	4.32269	3.89873	4.66985	4.37092	3.53477	4.78751	4.37469	4.53486	4.47092	3.8989	5.34672	5.67931	3.96126	4.01956	3.95839	3.96354	3.88404	4.52813	4.19017	3.72921	4.15034	3.87914	4.49994
UBA3	3.4686	2.84102	4.2398	3.69906	3.73897	4.07326	3.54635	3.44585	5.21537	3.14401	3.04044	3.56586	3.01445	3.76619	3.67336	2.88557	3.45334	3.32312	3.67358	3.94237	3.9475	3.29557	3.2271	3.57848	3.30912	2.50027	3.88927	3.44915	3.79064	3.1844	3.43337	3.28648	4.40715	3.76662	3.47883	3.15852	4.40568	3.96405	3.48615	3.68462	4.31057	4.06137	3.67223	3.39815	3.53356	3.61365	3.23404	4.09086	4.17655
UBA5	2.01839	1.43342	2.44527	2.38989	3.26741	2.4673	2.07953	1.89959	2.37744	2.02283	1.6478	2.56695	2.46239	2.32885	2.30736	1.5666	1.93188	2.40576	2.21835	2.57579	2.85117	1.74836	1.75346	2.34676	2.0167	1.774	2.51604	2.22401	2.26381	2.17167	2.26654	2.02319	2.79542	1.92228	2.35329	1.73013	2.60735	2.38959	2.14977	2.38374	2.71135	3.07553	2.11778	2.91241	1.34497	2.10288	2.27094	2.44759	2.39865
UBA52	7.52814	6.83357	6.99506	6.64781	5.94404	6.0497	6.59951	6.41581	6.34231	7.34609	7.5953	7.07806	5.63686	6.30232	5.931	6.57949	6.33977	6.33532	6.35912	6.68712	6.74375	6.34751	6.67589	5.65621	5.68948	7.49791	7.09596	5.97613	8.0682	7.13209	5.9109	6.63664	6.79597	6.02926	6.58598	7.75711	6.22293	6.46134	6.14496	6.54789	6.26618	5.94878	6.03183	6.64649	6.80876	6.42187	5.45828	6.76974	6.53434
UBA6	1.94134	1.52967	3.0248	2.85703	2.81907	2.32587	2.18941	2.13179	2.08294	1.79945	1.48895	2.57009	3.23623	2.65962	1.9917	1.29971	2.34382	2.29228	1.79146	3.0104	2.52849	2.46389	2.29792	2.01477	2.79773	1.26894	2.86147	2.32722	2.17457	2.75356	2.00569	2.5443	3.51253	2.41006	3.14624	2.31655	2.26705	2.41599	1.70604	2.52284	2.72385	3.19174	1.84989	2.4784	2.2068	2.12661	2.71419	2.62259	3.04019
UBA7	4.40837	3.50513	4.14779	3.0437	2.76146	2.93978	1.67893	3.48103	3.43008	2.70974	3.853	3.11052	4.24985	4.13486	3.11461	3.68645	3.80331	3.70877	3.17921	1.87913	2.00364	2.59129	2.77824	3.03075	4.37933	3.38859	3.609	4.28873	3.40579	3.47876	3.5035	3.25557	2.8869	3.71043	4.65715	3.08042	2.72976	2.32675	3.1615	3.86618	3.50609	4.54249	2.93788	2.99264	4.27188	3.8086	3.01399	3.99262	4.00898
UBAC1	3.65836	4.45279	3.69391	3.78513	4.11722	3.68993	3.70115	4.22072	3.49235	4.41857	3.99099	3.96968	2.92611	4.32035	3.39566	3.89181	3.81273	2.85899	3.60847	4.10497	4.76933	3.82641	3.53726	3.22883	3.83473	3.08064	4.01622	3.45345	3.01565	2.98686	3.72285	4.13843	2.93074	3.80561	4.16598	3.74813	3.1566	3.05737	3.69573	3.66197	3.74496	3.65332	3.7654	2.98586	3.11651	3.42757	3.01588	3.56117	3.64495
UBB	8.93494	8.59776	8.57128	8.47978	8.36108	7.94872	8.93786	7.87671	8.45764	8.7622	8.51358	8.79451	8.49564	7.90168	7.78278	8.17365	8.80672	9.15077	8.12032	8.10793	8.72534	8.64616	7.84952	7.57567	7.60173	9.08351	8.92269	8.22583	9.05809	8.50596	8.22312	7.75258	8.40371	8.58775	8.37429	8.49191	8.77911	8.67852	8.01878	8.39177	8.24279	8.48796	8.02207	7.27481	8.66608	8.09779	7.75776	8.40423	8.40637
UBC	6.99652	6.40558	6.2878	6.42222	7.51328	6.5044	6.38695	6.61665	6.57248	6.46682	6.91726	5.52678	7.48685	6.88804	6.81852	7.28597	6.05543	6.68518	6.91372	6.46986	6.44609	6.91171	7.77332	6.45963	7.23845	6.54346	6.35676	6.89328	6.5342	7.18773	6.59367	7.57464	6.24712	7.24438	7.13339	6.8103	6.84915	6.85089	6.71065	7.07794	6.22425	7.47151	6.72971	6.04952	6.82183	6.85239	6.83713	7.04461	6.78976
UBE2A	3.99335	4.08134	3.43267	3.05038	3.72535	3.06856	3.49798	3.50147	3.62048	3.39019	3.58871	3.74908	3.79587	3.66917	3.61756	3.10607	3.29121	3.6286	3.33103	4.93523	3.98555	3.78911	3.39532	3.28581	4.11042	3.05771	3.92442	3.8422	5.08185	3.2226	3.87965	4.63419	3.33777	3.81031	3.68732	3.14347	3.80447	3.02706	3.27689	3.84939	2.81443	3.47788	3.27846	3.97256	3.58852	4.10749	3.16228	3.67685	3.38284
UBE2B	4.08147	3.3838	4.12581	3.54842	2.5334	3.64556	3.45647	3.56757	4.19144	3.39913	3.95527	4.21628	3.67391	4.30089	3.97215	3.08548	3.89378	3.75583	3.77414	3.97971	3.72067	3.72809	3.3927	3.40021	3.71587	3.73536	4.50545	3.63262	4.44563	3.73692	3.63133	4.07079	4.51101	4.59956	3.70493	3.92756	4.6038	4.33199	3.66983	3.70954	3.40425	3.63045	3.99399	3.90609	3.00277	3.83611	3.70138	3.53956	4.29921
UBE2C	6.44106	6.45294	5.93807	5.54686	5.5788	6.62798	6.27734	4.84432	6.2859	6.47365	5.39656	6.00637	5.78741	4.59056	2.59573	6.36645	5.43975	6.28318	0.1829	5.73006	6.41073	8.26137	3.4294	1.18663	5.51322	4.23835	5.99656	4.02159	6.54745	4.71301	6.52966	6.40275	5.39351	6.05359	5.74071	7.10845	5.60146	6.82111	0.554929	6.13608	5.59966	5.46973	0.28024	6.7153	5.38759	3.88966	4.46543	7.28631	4.92688
UBE2D1	3.82996	2.90896	3.65477	3.44235	3.01463	3.34044	3.24112	3.42575	3.30247	2.68154	3.01936	3.61954	2.10089	3.42804	3.16051	1.77801	3.1703	3.69132	3.13971	4.09307	3.25022	3.15003	2.81757	2.83981	2.98862	2.2628	3.62637	3.38655	3.94044	3.07545	3.26351	3.85616	3.06192	4.13586	3.59377	2.83086	3.05212	3.30876	2.98971	3.60335	3.1769	3.22495	3.28338	3.45844	3.30202	3.37085	2.77685	3.76626	3.89504
UBE2D2	5.0043	4.5674	4.78981	4.4187	4.37327	4.12159	4.44289	4.19657	4.35417	4.60104	4.85074	4.76291	3.96584	4.85165	4.28535	4.00566	4.41204	4.81453	4.44521	5.11899	4.75846	4.41188	4.74005	4.0497	3.84578	4.41372	5.06036	4.0805	5.00539	4.4829	4.00523	4.93393	4.66185	4.63238	4.64679	4.26532	4.72802	4.66471	4.2538	3.95658	4.16194	4.24523	4.46824	4.31455	5.04466	4.57065	3.97402	4.25708	4.62417
UBE2D3	4.79589	3.95487	4.84703	4.56636	3.82143	3.98742	3.98184	4.01059	4.7434	4.27498	4.09923	4.25684	4.26962	4.60893	4.10788	3.95204	4.29001	4.61962	4.45708	4.62085	4.74462	4.14456	4.43404	3.90744	4.00012	4.10796	4.80158	4.27184	4.38654	4.76137	4.17139	4.22429	5.05634	4.96921	4.61653	3.93366	4.25011	4.27031	4.30546	4.53379	3.9771	4.45369	4.29703	3.85543	4.69785	4.18693	4.19241	4.78739	5.10329
UBE2D4	2.45477	2.68215	2.08024	2.22567	2.74819	2.45135	2.57224	2.62394	1.99341	2.81332	2.55801	2.47489	2.56645	2.11046	2.45874	2.36343	2.41517	2.25951	3.202	2.25696	2.43186	3.83968	2.32311	2.88984	1.43676	2.07715	2.11858	2.68265	2.48423	2.48845	1.92252	2.27427	2.38545	2.59455	1.84411	2.73766	2.44995	2.812	3.0952	1.83496	2.69424	2.25808	2.79651	2.9907	2.34818	2.98405	1.76951	1.91815	2.37925
UBE2E1	4.01347	3.63275	4.12294	4.31655	3.97454	4.30382	4.05092	4.03104	3.36012	3.88405	3.8348	4.33771	3.06734	3.70609	4.12346	3.45943	3.11709	4.66546	4.33648	4.69082	4.08754	3.76912	4.73348	4.05104	3.20577	3.86616	4.43314	3.77137	4.44125	4.31612	4.85028	3.70325	4.64725	4.69448	3.62445	4.1541	4.07862	3.90425	4.20379	3.71684	3.1598	3.98761	4.41963	3.88961	4.61654	4.33213	3.53738	3.59448	4.18193
UBE2E2	1.85114	2.24925	1.25278	2.45025	3.06286	3.00109	0.739174	2.84726	1.60479	0.73164	2.61205	1.97883	1.91254	1.87585	3.17066	1.59257	1.74246	1.84614	3.18108	3.39274	0.643284	1.11702	3.30867	3.44158	2.02846	1.68771	0.809747	2.52701	0.942999	2.14541	2.14277	3.0421	1.68949	2.92517	1.70956	2.18001	3.35785	2.45617	3.35865	1.18424	1.75679	0.755423	3.37026	2.53784	1.05865	3.34381	2.62158	2.00552	3.35883
UBE2E3	4.52938	3.57629	3.79643	3.79878	4.40532	4.09439	3.13063	3.71298	4.87007	4.62436	3.95626	3.65352	4.58226	4.20306	3.7155	4.46815	4.56012	4.76771	3.97845	3.8682	4.56219	4.56092	3.67946	3.33353	3.87789	3.85047	4.16505	4.0904	4.84609	4.81665	4.55962	3.63257	5.21892	5.34052	4.02284	4.28275	4.04417	3.99281	3.68737	4.27954	4.34034	4.31438	3.75122	3.57133	4.6834	3.83143	3.89681	4.16945	4.49053
UBE2F	2.75635	2.10216	3.21136	2.58246	2.65241	2.33523	2.49006	2.44577	2.97796	2.25101	2.70616	2.87248	2.32458	2.61392	2.56619	2.45321	2.97322	2.87403	2.66171	2.96904	3.0136	2.5574	2.51354	2.28784	2.2976	2.19219	3.14577	2.74872	3.29519	2.70906	2.66675	2.59347	2.95529	3.0977	3.00355	2.98817	3.00814	3.10392	2.52951	2.47383	2.58178	2.66809	2.46081	2.312	2.98664	2.58615	2.64602	2.52021	3.2064
UBE2G1	3.8799	3.47515	3.89825	4.03282	3.75693	3.61615	4.56585	3.67501	3.66686	3.71947	3.46313	3.08865	3.75372	3.60102	4.04092	3.94561	3.45413	4.19706	4.20772	4.25746	4.45867	3.8707	4.80326	4.39866	4.46487	3.36145	3.85928	3.81385	3.84369	3.86884	3.22518	3.27858	4.20774	3.27784	3.73271	3.16689	4.10388	3.86434	4.16098	3.24055	4.12299	4.2661	4.37551	2.83808	3.23889	4.46655	3.76601	3.97174	4.28056
UBE2G2	2.90626	2.59445	3.56795	3.55989	2.88047	2.10914	3.40248	3.0446	2.78525	3.09804	2.99839	2.99759	2.94721	3.51391	3.51407	2.91444	3.13369	2.23413	3.47436	3.80908	3.8713	3.33195	2.3242	3.7663	2.60049	2.72041	2.75177	3.15877	2.52862	2.60964	2.20654	3.21973	3.57009	2.86622	3.37433	2.68353	3.14088	3.41841	3.25426	2.96351	2.96027	3.38693	3.52696	3.78218	3.18443	3.14467	3.26112	3.15533	3.2984
UBE2H	3.76998	3.67942	3.9245	4.23497	4.47074	3.88947	4.72791	4.82896	4.71146	4.91905	3.67028	2.57633	4.18516	4.49672	5.14242	3.81501	4.65624	2.61214	4.77091	4.38612	4.33578	4.15099	4.2944	4.60158	5.12197	3.32255	3.76291	4.51738	4.33086	4.05983	4.23551	4.43308	4.5601	4.57545	4.06837	3.70307	4.2912	3.35796	4.32506	4.61983	4.05238	4.805	4.81899	3.6979	4.45557	4.38863	4.38188	3.82421	4.46447
UBE2I	3.95276	3.52029	3.94171	3.48641	2.81155	3.30376	3.93108	3.33206	3.32634	3.91383	3.98661	3.89634	2.55046	3.44935	3.06245	3.68603	3.94936	3.53565	3.27652	3.83852	4.02082	4.42187	3.23711	2.94137	3.43663	3.00989	4.01178	3.19102	3.48349	3.40558	3.93015	3.58535	3.62323	3.98193	3.45279	3.74761	3.78642	3.02003	3.25953	3.67321	3.2975	2.82939	3.23735	3.18193	3.88441	3.40302	2.89405	3.47145	3.47556
UBE2J1	4.47046	4.39402	5.21574	4.82341	4.90165	4.25593	4.52806	4.79509	4.70485	4.04321	4.56525	4.55727	4.47447	5.35748	4.51711	3.74155	4.72175	4.42386	4.12751	5.03602	4.90453	4.64712	4.66325	4.09172	4.34258	5.21677	5.7353	4.15117	4.1269	4.33547	4.52411	4.26295	4.98466	4.50877	4.96698	4.09523	5.04529	4.75563	4.22926	4.85783	4.80514	5.21475	4.18055	3.56128	4.13978	4.31073	4.45725	4.87392	5.16341
UBE2J2	3.47213	2.87919	2.96293	2.96513	2.69618	2.78201	2.86029	2.7187	3.02925	3.45337	3.33317	2.84787	2.5667	3.48186	2.86528	4.01703	3.18872	3.46954	2.79935	3.38201	3.40406	3.75841	3.07341	2.24934	2.47588	2.99709	3.5386	2.76258	2.87783	3.45208	3.83971	3.05756	2.6723	3.94929	3.27524	3.32391	2.65109	1.98508	2.69533	3.64918	2.99843	2.89398	2.89414	3.91078	2.63924	2.69513	2.8176	2.68506	3.0715
UBE2K	4.07712	4.1022	4.68859	4.4197	4.79521	4.27065	3.66026	3.89184	4.28411	3.86951	3.48319	4.12274	4.14026	4.55885	4.00853	3.62206	3.48872	4.12817	3.75068	4.77538	4.75626	5.1757	4.03963	4.0922	3.86632	3.78445	4.72831	3.83147	4.02736	4.19721	3.85051	3.80798	4.91723	4.57292	4.48094	3.87214	4.80795	4.36892	3.8365	4.32678	4.01969	4.44215	4.14683	4.07068	4.2015	3.78196	3.95391	4.19823	4.68542
UBE2L3	5.46498	4.74455	5.31962	4.95537	4.78828	4.41928	5.10272	4.97423	4.41107	4.86496	4.87713	4.94099	4.20334	4.91761	4.66701	4.52113	5.24865	4.44563	4.82275	5.20319	5.26584	4.4487	4.76544	4.53806	4.29652	4.6528	5.22362	4.67984	4.88261	5.13822	4.62189	4.29414	4.68071	5.05568	4.86444	5.16183	4.76073	4.56061	4.60885	4.79854	4.10868	4.78014	4.8527	4.27826	5.41984	4.81731	4.0908	5.01893	4.99569
UBE2L6	7.43214	5.42327	6.0067	5.27018	4.13064	4.11266	5.28955	5.0362	5.78238	5.04433	5.45627	5.18363	3.55221	5.51146	4.0103	6.14997	5.64455	6.21323	4.27524	3.85714	4.71512	3.60742	4.08544	3.75569	4.49427	5.93644	5.5087	4.5084	4.85655	5.65365	5.13042	4.73714	4.13865	5.30349	5.91524	4.58289	3.75872	4.70082	3.93088	3.8534	4.61478	6.00321	4.02819	3.91167	5.53867	4.33763	4.02006	6.03507	6.74219
UBE2M	6.16809	5.94539	4.81031	5.44349	4.74324	6.67931	5.07628	5.33048	4.74852	5.66425	5.23259	5.37209	4.9485	5.18959	4.65417	5.99337	5.34643	6.0509	5.17908	5.58422	5.66858	6.03588	5.02439	4.31211	5.09981	5.07611	5.58063	4.46006	5.64304	5.06234	6.28913	5.51493	4.54294	6.17136	5.57146	5.55104	5.02844	5.18724	4.9417	5.96936	5.21159	4.98498	5.20412	5.52288	4.67586	4.5886	4.61202	4.7875	4.88285
UBE2N	4.39858	3.75944	4.50059	4.44228	3.27506	4.12519	4.81374	3.48757	3.7079	3.94968	3.96519	4.23058	3.30918	3.84251	3.49327	3.89412	4.14834	4.25687	3.64239	4.68925	4.49448	4.2817	3.74297	3.35679	3.04224	3.37295	4.81894	3.29146	4.68728	3.5449	3.45328	3.86825	4.48177	4.18723	4.05771	3.99927	3.72869	4.31985	3.51123	4.28395	2.92979	4.15678	3.67037	4.30527	3.31001	3.65532	3.18331	3.94975	4.23942
UBE2NL	0.191088	0.0805044	0.196193	0.154686	0.0906239	0.142673	0.2478	0.111447	0.0713827	0.0838387	0.0984773	0.162508	0.105037	0.0818797	0.0815516	0.150228	0.438003	0.139119	0.10211	0.134495	0.202535	0.154021	0.228448	0.12293	0.0684181	0.0536482	0.217473	0.070977	0.153025	0.158135	0.163377	0.226774	0.143349	0.21771	0.186666	0.105035	0.0486499	0.127409	0.0699306	0.286555	0.0467362	0.204261	0.133493	0.493315	0.0644435	0.257212	0.078041	0.101928	0.248516
UBE2O	2.7959	3.19105	3.13051	3.34834	4.06795	3.17131	3.98078	2.6065	2.93959	3.19434	2.85358	2.7164	3.06867	3.5512	2.68834	3.14021	3.08774	2.75336	2.47099	3.55703	3.1748	2.79373	2.42632	2.11099	3.64093	1.9761	2.24314	2.60475	2.0628	2.62488	2.72313	3.35785	2.95761	2.6145	3.58997	2.37104	2.92478	2.30702	2.44842	2.8517	4.06769	3.40277	2.42497	2.81844	2.67171	2.40554	2.89966	2.82321	2.68988
UBE2Q1	4.31769	4.64292	4.06953	4.0422	4.39938	4.76211	4.20926	4.11744	4.60393	4.35351	4.08096	4.00762	4.71121	4.5055	3.59228	4.91157	4.16359	4.24606	3.2302	4.82362	4.20339	5.0105	3.51753	3.08277	4.84149	3.90215	4.51263	3.66358	4.21953	3.78204	4.43658	4.58845	4.2744	5.54636	4.15782	4.30409	5.00123	4.69325	3.17423	4.58769	4.28033	3.88183	3.21025	4.3009	4.85424	3.34525	3.6604	4.48749	4.02858
UBE2Q2	3.60652	3.44679	3.76254	4.05666	4.07912	2.96176	3.76494	4.40062	2.94844	2.80179	3.19284	4.09017	3.92462	4.06135	4.77294	3.17757	3.18588	3.22758	4.75397	4.66205	3.30438	3.18751	3.65672	4.91364	3.36611	2.99241	2.87267	3.95681	3.41951	3.51023	3.78574	4.03702	4.0808	3.80544	2.61197	3.68301	3.65763	3.98725	4.5526	1.98479	3.62579	3.70159	4.79513	3.17522	4.3793	4.55023	3.86696	3.26888	4.44287
UBE2QL1	0.0751267	1.25235	0.202533	0.627984	0.0296461	0.0576404	0.0534202	0.577575	0.222903	0.00591168	0.357464	0.0272838	0.0830161	0.317056	0.975945	0.367314	0.483713	0.14603	1.12149	0.210504	0.00595636	0.987519	0.415712	0.967659	0.0676284	1.85212	0.1527	0.494002	0.0436465	0.52063	0.178433	0.633512	0.198461	0.233953	0.476953	0.200701	0.984834	0.240046	2.28244	0.0448736	0.0844083	0.146634	0.88459	0.47376	0.17043	2.00278	1.05886	0.239832	0.509502
UBE2R2	4.53145	4.89257	4.72923	4.65774	5.93226	4.53056	4.80679	5.24958	4.40109	4.75416	4.49304	4.40733	4.14774	4.47294	4.4767	3.85316	4.49234	3.91187	4.32705	5.23828	4.51486	4.63081	4.71028	4.08582	4.17138	3.98952	4.79746	4.41619	4.3421	4.27915	4.72295	4.41686	4.60058	5.04242	4.5123	5.39312	4.80553	4.23393	4.4164	4.97669	4.18733	4.67134	4.4829	4.70331	4.9183	4.40795	4.5817	4.59947	4.55315
UBE2S	5.53308	6.03767	3.75665	3.96816	3.24036	3.79352	4.62231	3.8617	3.71991	4.84688	4.01529	4.46617	3.47813	3.85327	2.4024	4.45996	4.00879	4.94839	1.57958	5.33204	4.94131	4.67916	2.74447	1.57368	4.53983	2.91722	4.58809	2.61289	4.5893	3.29959	6.19824	5.22703	3.55944	5.22426	4.53223	4.91142	3.91844	3.50736	1.84448	4.60729	3.79441	3.60162	1.82472	4.21733	3.4427	2.16098	3.25227	3.82711	3.70431
UBE2T	4.78618	1.51991	4.83816	3.84707	4.51305	4.59437	5.1339	3.43492	4.93582	5.02416	3.79197	4.7318	4.67182	4.31449	2.45749	4.56851	4.12974	3.96051	0.924225	5.18692	5.65068	5.33796	2.11509	1.43112	4.65279	2.889	5.61617	3.12584	5.2012	3.76436	5.51033	4.56694	4.91926	3.79722	4.79803	4.7027	3.84872	5.03577	1.22658	5.07876	4.19506	4.41333	0.96292	4.75611	4.74187	2.9964	2.76317	4.17837	4.31114
UBE2U	0	0	0	0.068528	0	0.205623	0.143666	0	0.835809	0	0	0	0.0395923	0.035764	0.0971145	0.0252964	0.652374	0	0.040361	0.249731	0.0139512	0.0345155	0	0.0579148	0	0.257504	0	0.0116788	0	0.0701027	0.107428	0.111669	0.157638	0.00943825	0.0106671	0.402014	0.0211118	0.308139	0.0229153	0.0193341	0.777931	0.0175763	0.00898925	0.925378	0.151137	0.238487	0.0306915	0	0.0359751
UBE2V1	1.96663	1.54925	2.66851	2.25783	2.2519	2.42444	2.24285	1.91783	2.73095	2.20106	1.39921	0.86675	2.19273	1.39252	1.55238	1.39302	2.12923	1.23693	1.46308	1.81413	1.62795	2.27668	1.58987	1.63667	1.78706	1.3381	1.52069	1.64768	1.69938	1.68813	1.92502	2.39939	2.25388	2.26557	1.64178	1.90508	2.33438	3.13785	1.45133	1.70918	2.00838	1.93433	1.49045	2.15253	1.23159	1.68171	2.0644	2.03454	1.90357
UBE2V2	2.4016	2.96669	3.10671	2.44107	2.72407	2.86471	2.39634	2.50214	3.42338	3.04726	3.19198	3.50779	2.6242	3.39605	3.07895	3.13358	2.45881	2.56883	3.23694	3.38539	3.53314	3.45052	2.48177	2.90787	2.48181	2.48041	3.33142	2.8175	2.83005	2.84372	2.99771	2.89027	3.94509	2.87193	3.54767	2.44092	3.88506	3.81771	3.06756	2.42929	2.29686	3.23604	3.35804	4.34659	2.84905	2.83019	2.55672	2.12492	3.41808
UBE2W	1.63125	1.95616	2.1816	2.1005	2.73911	3.06703	2.01923	2.29712	2.51967	2.16815	1.84124	2.01852	2.54171	2.48754	2.12635	2.2139	2.09517	1.97524	2.0186	2.20597	2.37108	2.02781	1.8507	1.87193	1.72114	1.32276	2.00912	1.97465	2.07356	2.06573	1.8215	2.34859	2.98127	2.19346	2.27858	1.48627	2.84586	3.24967	2.00444	2.60816	2.07941	2.29493	2.1182	3.83233	1.88605	2.24932	2.21245	1.88113	2.72952
UBE2Z	4.88908	4.46944	4.47038	4.50915	5.08744	4.667	5.09324	4.43586	4.17016	4.55015	4.34638	3.40356	4.05913	4.42009	4.0419	3.66623	4.57129	4.38852	3.62695	4.25651	4.23751	3.57158	3.80559	3.45983	4.27908	3.45181	3.81132	4.04486	4.20979	4.21984	3.74266	4.4337	4.37655	3.84816	4.35348	3.33318	4.79309	5.54041	3.53936	3.84094	4.43184	4.10818	3.5963	3.42504	4.11717	3.7704	4.40261	4.33317	4.78117
UBE3A	2.61368	2.67279	3.42893	3.43013	3.44144	3.12486	3.65458	3.64569	3.56464	2.8518	2.65912	3.86029	3.284	3.28474	3.69861	2.43159	3.28535	2.94393	3.4259	4.47793	3.94493	3.68978	2.90485	3.3225	2.29317	2.45608	3.82065	3.20992	2.749	3.01747	3.43051	2.90877	3.31956	3.56004	3.5076	2.54607	3.29465	2.86961	3.27685	3.38445	3.28032	3.38191	3.56259	3.57681	2.86713	3.07745	3.17004	3.28106	3.25902
UBE3B	2.23194	2.23342	2.38886	2.67359	2.62401	2.01545	2.41307	2.6383	2.36916	2.23774	1.86333	1.6558	2.92469	2.45191	2.36337	1.89951	2.77327	2.03684	2.4653	2.34645	1.96717	2.79309	1.97121	2.55342	2.18212	1.68094	2.2626	2.41984	2.61533	2.26617	1.79572	2.39829	2.57748	2.38775	2.47592	1.85547	2.32132	2.60217	2.39523	2.60425	2.385	2.9144	2.449	2.39594	1.84561	2.28261	2.19627	2.60995	2.41627
UBE3C	3.29524	2.67035	3.81422	3.75905	4.31403	2.93931	4.36448	3.97926	4.02107	4.23332	2.939	3.06803	4.38464	3.99033	3.63718	3.48697	4.0691	3.57196	3.49549	3.84145	4.24363	3.48903	3.13458	3.48039	3.46331	2.47701	3.50944	3.63025	3.24641	3.32304	2.85692	3.69852	4.15818	3.15513	3.6462	2.64186	3.51169	3.04627	3.36733	3.91325	4.06577	4.32937	3.58552	2.73765	3.65653	3.44828	3.84303	3.42165	4.08262
UBE3D	0.821899	0.649852	1.06799	0.784496	0.750911	0.416172	1.18634	0.696143	0.933551	0.848948	0.677143	0.696493	0.445631	0.513481	0.598615	0.400909	0.836661	0.77647	0.621301	1.2408	1.11795	1.11723	0.493228	0.468679	0.69051	0.317015	1.24213	0.48012	0.798807	0.633242	0.705008	0.449887	1.52506	0.557468	0.890114	0.846218	0.700462	1.17094	0.649281	0.943375	1.92632	0.714818	0.572313	1.19935	0.441159	0.677525	0.516616	0.579039	0.675021
UBE4A	2.95305	2.79031	3.5111	4.16194	3.44895	3.60121	3.50621	3.36417	3.83731	3.36904	2.1108	2.32602	4.71044	3.64526	2.94785	1.82526	3.29121	3.26732	3.21925	2.86458	3.37662	3.65452	2.92431	3.19758	3.99053	2.64702	3.12865	3.23978	2.67291	3.29824	2.91854	3.3245	3.66473	2.31108	3.04068	2.00566	3.77355	4.31061	3.19395	3.5692	3.30567	4.35313	3.0085	2.45145	2.29697	3.34897	3.1575	3.93869	3.08802
UBE4B	2.47321	3.04453	3.18698	3.06821	3.37456	2.81791	2.60821	2.99564	3.33915	3.30514	2.86116	2.63665	4.90688	3.39357	3.64403	3.3851	3.06455	2.16505	3.69712	3.41564	3.30725	3.23073	3.1022	3.46282	4.08943	2.47619	2.64597	3.42926	2.58234	3.2159	2.99121	3.08017	3.42717	3.27704	3.26684	2.42193	4.25565	3.73833	3.7582	3.09194	3.95249	3.12826	3.5525	3.11532	2.1364	3.88164	3.1587	2.51973	3.10517
UBOX5	2.2995	2.46779	2.6655	2.18117	3.22337	2.72709	1.89225	2.54036	2.72572	2.20485	2.28503	1.37042	2.44829	2.48057	1.93344	2.45259	2.63278	1.83245	2.54299	1.83004	1.69055	3.10518	2.05111	2.0114	1.31144	1.82738	1.85317	2.38459	1.81762	2.05926	1.97466	2.25198	1.40586	1.96633	2.36819	2.41595	1.43668	2.09285	2.20333	2.11305	2.79095	2.10831	2.26506	2.6862	1.89942	2.32268	1.86777	2.46339	1.7571
UBQLN1	4.31384	3.8426	4.7037	4.60923	5.46284	4.33473	4.78587	4.8927	4.29406	4.4328	3.65069	3.63133	3.63057	4.60576	3.79793	3.92754	4.10361	3.6665	4.00249	4.54426	4.76136	4.49093	4.21624	3.98926	3.96818	3.36078	4.67997	3.93734	3.90913	3.76571	3.03212	5.42309	4.74924	3.70319	4.07486	3.61103	4.71518	3.91453	3.74818	4.82659	3.65287	4.10842	3.905	3.57418	4.08693	4.16508	4.12313	3.56542	4.69338
UBQLN2	3.87801	4.76963	4.02597	4.39977	4.85222	3.85315	4.57826	4.78849	3.99047	4.08314	3.76147	3.68891	4.11093	4.35237	4.49888	3.19696	3.79895	4.18474	5.16309	3.70789	4.6078	4.79027	4.59551	4.61974	3.86278	3.28002	3.85482	4.84773	3.74825	4.18672	4.20143	4.53676	3.85294	4.085	3.82045	2.65091	4.16578	3.54033	4.59844	4.0713	4.00341	4.1655	4.76091	3.85263	4.53526	4.96473	4.1197	3.60414	4.08919
UBR1	1.89837	2.01298	2.61571	3.15741	2.64274	2.16528	2.38857	2.73614	2.97466	1.76159	1.63205	1.47329	3.00838	2.47076	2.69151	1.63643	2.46537	1.95448	2.75294	2.2132	2.47238	2.60165	1.50652	2.8667	1.79904	1.22281	2.24982	2.59153	2.05486	2.59399	2.27124	2.31361	2.51432	2.23566	2.50962	1.25699	2.98468	2.40544	2.64644	2.25861	2.573	2.71213	2.7198	2.02164	1.60694	2.61782	2.71333	2.39715	2.58471
UBR2	2.43161	2.68723	3.48281	3.2215	3.3446	2.58936	2.64505	2.77199	3.79262	2.66718	2.49452	2.71327	3.45098	3.28101	2.81158	3.2587	3.07681	2.22993	3.00954	2.92696	2.97215	3.23737	2.31522	3.13599	4.48715	2.32103	3.06737	3.12512	2.61667	2.70097	2.32951	3.50326	3.51029	2.70067	3.40924	2.18307	2.87636	3.29095	2.94349	2.93961	4.2938	3.40275	3.02291	2.53831	2.38212	3.03664	3.05656	3.53097	3.23504
UBR4	3.40405	3.50604	3.11039	3.38614	3.60144	2.96537	3.84206	3.39256	3.72929	3.06878	2.78245	1.8783	3.53094	3.7281	3.26915	3.19056	3.32976	2.20798	3.40255	3.17001	3.0269	3.48036	2.87698	3.33699	3.68315	2.2893	2.80253	3.51642	2.64543	3.20517	3.04328	3.6736	3.16851	2.9771	3.40561	2.272	3.92245	3.77556	3.50499	3.1663	4.21109	3.7051	3.08358	2.74713	2.66929	3.21311	3.91199	2.98184	2.97433
UBR5	2.63619	2.9556	3.36621	3.30579	4.3364	4.27096	3.22875	3.76032	4.28358	3.41471	2.64588	2.45588	3.30914	3.54836	3.41085	3.29362	3.18097	2.81277	3.19665	3.28635	3.14986	3.38001	2.89718	3.49971	3.29899	2.08135	2.92155	3.41938	3.02838	3.49897	2.52024	3.53789	3.75995	2.63201	3.59319	2.19696	4.09525	3.42861	3.13849	3.88782	4.38615	3.63804	3.14822	3.68144	2.61342	3.29121	3.91663	3.56312	3.52583
UBXN4	4.69335	4.4951	5.64759	4.99443	5.03814	4.45828	5.0028	5.13809	5.48712	4.47476	4.41122	5.58702	4.87237	4.74287	4.72887	5.36684	5.01259	4.82688	4.14334	5.35422	5.67073	5.63969	4.2018	4.24161	5.31575	4.38184	5.63038	5.2527	4.99792	4.69	5.25428	5.15076	5.26549	4.60228	5.49314	4.55388	5.24633	5.80852	4.12747	4.89274	5.07771	5.34475	4.17699	5.06582	5.09437	4.56434	5.03106	5.00994	5.22604
UBXN8	1.93247	2.11769	1.61338	2.15113	2.08536	1.61069	2.262	1.10188	3.11632	2.85767	1.78766	1.60514	2.16265	1.60403	1.2695	1.2659	1.48829	1.81181	1.01521	1.59732	3.10348	1.09381	1.39915	0.994399	1.38013	1.38122	2.67954	1.47917	0.941517	1.4137	1.30644	0.993244	3.05412	2.33629	2.23185	1.62331	1.43365	2.13306	1.2846	1.87462	1.61248	1.90641	1.16296	2.00407	2.10652	0.997258	1.43263	1.20487	2.17447
UCHL1	0.802914	4.708	0.864296	2.63029	3.29824	2.06514	0.398221	2.65293	1.05653	0.457174	2.44326	0.672061	1.48748	1.19457	3.81253	0.950982	1.2919	0.222144	4.34784	0.646504	0.180213	0.97239	1.32569	2.39753	0.779248	0.868916	0.380431	1.58966	0.27095	1.20375	0.737358	1.76231	0.99418	2.33613	1.02013	2.89212	3.66483	1.62396	4.42087	0.257732	1.44724	0.406858	4.864	0.977723	0.962632	1.577	3.40757	1.0135	2.4113
UCHL3	3.76531	2.11695	4.02987	1.9758	2.83522	3.46479	3.57702	2.16763	3.44389	2.79615	3.39721	3.71508	2.5172	2.46532	2.38751	3.3443	2.56918	3.58484	1.86635	2.86519	2.55464	1.07434	2.76803	1.90101	2.24491	2.84289	3.959	2.42229	3.48159	3.31955	3.00297	2.42286	3.66112	2.60979	2.93176	3.97391	2.40276	3.13527	1.81472	3.55804	2.5645	2.51569	1.74498	3.9808	2.31975	2.55847	1.67763	3.33867	2.78565
UCHL5	2.19363	2.31957	3.00127	2.53017	2.80483	2.566	2.3613	2.32344	3.03165	2.56571	1.90535	3.23424	2.37679	2.78459	2.01918	2.1245	2.45357	2.60233	2.03658	3.41208	3.46661	3.08304	2.21517	2.04245	2.581	1.84053	3.81393	2.03072	2.31526	2.09884	2.82766	2.28152	3.65498	2.59808	3.07508	2.32531	2.50635	2.85774	1.97336	2.9349	2.24756	2.59283	2.05166	2.95538	2.86474	1.98773	1.84429	2.35486	2.91232
UFL1	3.32505	2.88483	4.01614	3.89316	4.67224	4.06289	4.32723	3.55639	4.25667	3.53055	2.86023	4.19126	4.01504	3.94051	3.6353	2.61639	3.11598	3.67465	3.68266	3.64732	4.1145	3.95277	3.47497	3.88264	3.64591	3.32489	4.6787	3.2788	2.76839	3.93404	3.9588	3.39772	3.93388	4.06702	3.72683	3.75489	3.6782	4.41439	3.6034	3.5678	4.47437	4.05119	3.92011	3.30432	3.28508	3.70962	3.5478	3.32769	3.51436
UIMC1	2.36148	1.81786	2.45057	2.34081	2.30351	2.12939	2.39019	1.73676	2.20309	1.83428	2.24502	2.05064	2.04877	2.37663	2.30416	1.45553	2.2829	1.72032	2.41759	2.7501	2.1703	1.97565	1.45392	2.11851	2.43194	1.40512	2.17601	2.04956	2.17313	1.98355	2.43323	2.31891	2.72356	2.11766	2.47489	1.46861	2.59927	2.19177	2.37096	1.67112	2.31117	2.44933	2.25166	2.59022	2.1076	2.25661	2.35133	1.96333	2.36683
UMOD	0	0.18225	0.0223046	0.07974	0	0.00371875	0.0492704	0.00669701	0.0101392	0	0.00882967	0	0.0107807	0	0.00416037	0.0136939	0.145993	0.113845	0.0146377	0.0683553	0.0150383	0.148984	0.0461855	0	0	0.0559019	0.0173786	0.0250702	0.0185853	0	0	0.00567961	0.0296302	0	0	0.0299846	0	0.0262192	0.0549804	0.0260001	0.0109662	0.00950305	0	0.40132	0	0.183561	0.0111071	0	0.00392271
UNKL	0.64142	1.30588	1.25757	1.61919	1.41645	1.55099	0.766633	1.28581	1.65441	1.01059	1.25913	1.00059	1.36437	1.60295	1.60166	1.57449	2.08859	0.919216	1.68069	1.19611	1.58016	1.76349	1.01161	1.22163	1.69023	0.771391	0.820714	1.48549	0.74698	1.33015	2.06019	1.44213	1.0653	1.91904	1.22965	0.785484	2.00616	1.05106	1.50573	1.22659	2.2332	1.37146	1.5933	1.11805	1.02101	1.58571	2.00593	1.66734	1.15456
USP10	4.47175	3.735	4.73482	4.68779	4.70147	4.32448	4.95183	3.62068	4.49097	4.64504	3.88842	4.53562	4.05655	4.33645	3.85506	4.07822	4.0403	4.56079	4.11311	5.0593	4.89	4.75988	3.92113	3.79552	3.728	3.46499	4.63686	3.83341	4.36741	4.46547	5.12001	3.75714	4.66652	3.6644	4.47283	3.94337	3.88287	4.51631	3.8136	4.12175	4.47918	4.39889	4.02368	3.65192	4.15596	3.90697	3.72206	4.42973	4.49207
USP11	3.82806	5.17286	2.90143	4.51042	4.39295	3.53359	4.38627	4.22072	3.51029	2.85945	4.11474	2.72049	4.07919	3.67217	4.01924	3.65221	3.62435	3.39669	4.4636	3.61076	2.18984	5.22531	3.35117	3.81259	2.92962	3.00378	2.20702	3.57551	2.62794	3.54083	3.5961	4.1193	3.77932	3.73976	3.51609	3.8392	3.90537	4.16617	4.31931	3.09812	4.26832	3.08124	4.46562	2.80001	3.36965	4.24478	4.21168	3.3672	4.10901
USP12	2.61647	2.61853	4.07313	3.88196	3.8264	3.91871	2.51147	3.45773	2.51442	2.06118	2.39675	1.96887	3.40067	3.31842	4.04089	1.82155	3.20077	3.78986	3.74416	3.86777	2.81849	3.27128	2.39571	3.9674	2.9227	2.2243	3.46899	3.63686	2.93021	2.64174	2.20548	5.32939	3.31216	2.58321	3.34496	2.22744	3.04931	3.94398	3.63916	3.27683	2.7794	3.48626	3.90883	3.82234	2.6834	3.83648	3.55012	3.13887	3.6824
USP13	1.01192	1.52273	1.37591	1.65802	1.65033	2.00909	2.05138	1.62488	1.83975	1.52381	1.04354	1.04768	1.22126	0.90655	2.09724	1.34203	2.3421	1.52652	2.15702	1.80522	2.19016	2.45515	0.916042	2.17171	1.36771	0.595174	1.58671	1.40582	1.61758	0.862877	1.18945	1.43636	1.43147	0.689921	1.03484	0.899351	1.5561	1.32303	1.96895	0.526783	1.4087	2.3955	2.00391	1.63216	2.45672	1.9016	2.17322	1.63651	1.63811
USP14	3.73133	3.29113	4.18971	4.03954	3.85192	4.97128	3.627	3.88173	3.88404	3.81866	3.07341	4.03342	4.80979	4.03337	3.78572	3.05991	3.91002	4.05038	3.45663	4.53701	4.64452	3.86794	3.16282	3.71419	3.87755	2.77274	4.17731	3.58696	4.15862	3.5352	3.48913	3.80319	4.37581	4.10219	4.38016	3.13941	4.51236	4.34588	3.43734	3.32972	3.24068	4.60694	3.50636	4.76616	3.91933	3.77473	3.25324	3.81957	4.36635
USP15	1.59518	1.11167	2.02855	1.80589	1.54734	1.83777	1.88322	1.7017	1.93938	1.35927	1.35648	1.63583	2.18172	1.99163	1.83017	1.10114	1.80869	1.87126	1.85532	1.86622	1.74377	1.93463	1.67753	1.98399	1.72631	1.26508	1.95316	1.75159	1.99207	1.76106	1.53261	1.58127	2.28194	1.69197	2.33739	1.14059	1.9325	2.11839	1.7499	2.1958	1.89554	2.45056	1.80768	1.79366	1.09067	1.98197	2.16336	2.37811	2.43448
USP16	2.64302	2.12696	3.4291	3.18587	3.10632	3.22455	3.27675	2.67082	2.95019	2.57736	2.53608	3.20728	3.35132	3.03039	3.26044	2.20969	3.06909	3.13497	3.25143	3.16202	3.24751	3.417	2.62778	3.38884	2.63114	2.65681	3.38731	3.12934	2.50478	2.59424	3.50582	2.00653	3.38429	2.68248	3.25872	2.53212	3.08004	3.15695	3.30472	3.0358	2.69232	3.38741	3.44014	3.4939	3.33941	3.29993	2.89279	2.79657	3.27431
USP17L1	0	0	0	0	0	0	0.0133455	0	0.0108463	0	0	0	0	0.204189	0	0	0	0	0	0	0	0	0	0	0	0	0	0	0	0	0	0	0	0	0	0	0	0	0	0	0.0117306	0	0	0	0	0.087083	0	0	0
USP17L10	0	0	0	0	0	0	0	0	0	0	0	0	0	0	0	0	0	0	0	0	0	0	0	0	0	0	0	0	0	0	0	0	0	0	0	0	0	0	0	0	0	0	0	0	0	0	0.0112684	0	0
USP17L11	0	0	0	0	0	0	0	0	0	0	0	0	0	0	0	0	0	0	0	0	0	0	0	0	0	0	0	0	0	0	0	0	0	0	0	0	0	0	0	0	0	0	0	0	0	0	0	0	0
USP17L12	0	0	0	0	0	0	0	0	0	0	0	0	0	0	0	0	0	0	0	0	0	0	0	0	0	0	0	0	0	0	0	0	0	0	0	0	0	0	0	0	0	0	0	0	0	0	0	0	0
USP17L13	0	0	0	0	0	0	0	0	0	0	0	0	0	0	0	0	0	0	0	0	0	0	0	0	0	0	0	0	0	0	0	0	0	0	0	0	0	0	0	0	0	0	0	0	0	0	0	0	0
USP17L15	0	0	0	0	0	0	0	0	0	0	0	0	0	0	0	0	0	0	0	0	0	0	0	0	0	0	0	0	0	0	0	0	0	0	0	0	0	0	0	0	0	0	0	0	0	0	0	0	0
USP17L17	0	0	0	0	0	0	0	0	0	0	0	0	0	0	0	0	0	0	0	0	0	0	0	0	0	0	0	0	0	0	0	0	0	0	0	0	0	0	0	0	0	0	0	0	0	0	0	0	0
USP17L18	0	0	0	0	0	0	0	0	0	0	0	0	0	0	0	0	0	0	0	0	0	0	0	0	0	0	0	0	0	0	0	0	0	0	0	0	0	0	0	0	0	0	0	0	0	0	0	0	0
USP17L19	0	0	0	0	0	0	0	0	0	0	0	0	0	0	0	0	0	0	0	0	0	0	0	0	0	0	0	0	0	0	0	0	0	0	0	0	0	0	0	0	0	0	0	0	0	0	0	0	0
USP17L2	0	0.0127848	0	0.0443357	0.0192142	0	0	0.0119312	0.00905176	0	0	0.0176781	0.0191856	0.00868529	0.0221379	0	0.0566037	0.0150233	0	0	0.0134278	0	0	0.0113285	0.008668	0	0	0.0112403	0	0	0	0	0	0	0.0305828	0	0	0.011758	0	0	0.0097903	0.0084836	0	0.0929657	0	0.0490672	0	0	0.00699386
USP17L20	0	0	0	0	0	0	0	0	0	0	0	0	0	0	0	0	0	0	0	0	0	0	0	0	0	0	0	0	0	0	0	0	0	0	0	0	0	0	0	0	0	0	0	0	0	0	0	0	0
USP17L21	0	0	0	0	0	0	0	0	0	0	0	0	0	0	0	0	0	0	0	0	0	0	0	0	0	0	0	0	0	0	0	0	0	0	0	0	0	0	0	0	0	0	0	0	0	0	0	0	0
USP17L22	0	0	0	0	0	0	0	0	0	0	0	0	0	0	0	0	0	0	0	0	0	0	0	0	0	0	0	0	0	0	0	0	0	0	0	0	0	0	0	0	0	0	0	0	0	0	0	0	0
USP17L24	0	0	0	0	0	0	0	0	0	0	0	0	0	0	0	0	0	0	0	0	0	0	0	0	0	0	0	0	0	0	0	0	0	0	0	0	0	0	0	0	0	0	0	0	0	0	0	0	0
USP17L25	0	0	0	0	0	0	0	0	0	0	0	0	0	0	0	0	0	0	0	0	0	0	0	0	0	0	0	0	0	0	0	0	0	0	0	0	0	0	0	0	0	0	0	0	0	0	0	0	0
USP17L26	0	0	0	0	0	0	0	0	0	0	0	0	0	0	0	0	0	0	0	0	0	0	0	0	0	0	0	0	0	0	0	0	0	0	0	0	0	0	0	0	0	0	0	0	0	0	0	0	0
USP17L27	0	0	0	0	0	0	0	0	0	0	0	0	0	0	0	0	0	0	0	0	0	0	0	0	0	0	0	0	0	0	0	0	0	0	0	0	0	0	0	0	0	0	0	0	0	0	0	0	0
USP17L28	0	0	0	0	0	0	0	0	0	0	0	0	0	0	0	0	0	0	0	0	0	0	0	0	0	0	0	0	0	0	0	0	0	0	0	0	0	0	0	0	0	0	0	0	0	0	0	0	0
USP17L29	0	0	0	0	0	0	0	0	0	0	0	0	0	0	0	0	0	0	0	0	0	0	0	0	0	0	0	0	0	0	0	0	0	0	0	0	0	0	0	0	0	0	0	0	0	0	0	0	0
USP17L3	0	0	0	0	0	0	0	0	0	0	0	0	0	0.0513021	0	0	0	0	0	0	0	0	0	0	0	0	0	0	0	0	0	0	0	0	0	0	0	0	0	0	0	0	0	0	0	0.0296156	0	0	0
USP17L30	0	0	0	0	0	0	0	0	0	0	0	0	0	0	0	0	0	0	0	0	0	0	0	0	0	0	0	0	0	0	0	0	0	0	0	0	0	0	0	0	0	0	0	0	0	0	0	0	0
USP17L4	0	0	0	0	0	0	0	0	0	0	0	0	0	0.0207403	0	0	0	0	0	0	0	0	0	0	0	0	0	0	0	0	0	0	0	0	0	0	0	0	0	0	0	0	0	0	0	0.0296156	0	0	0
USP17L5	0	0	0	0	0	0	0	0	0	0	0	0	0	0	0	0	0	0	0	0	0	0	0	0	0	0	0	0	0	0	0	0	0	0	0	0	0	0	0	0	0	0	0	0	0	0	0	0	0
USP17L8	0	0	0	0	0	0	0	0	0	0	0	0	0	0.0209097	0	0	0	0	0	0	0	0	0	0	0	0	0	0	0	0	0	0	0	0	0	0	0	0	0	0	0	0	0	0	0	0	0	0	0
USP18	2.80548	3.64927	2.56887	3.13594	1.55412	1.26363	1.34693	2.59278	3.56713	2.89128	2.21322	1.45234	2.02453	2.68559	0.767974	2.75968	2.84288	2.3648	1.02636	0.803927	2.36998	2.57893	1.06019	0.587013	2.75309	2.22968	2.89075	1.1872	1.87354	2.33361	1.25533	3.04896	2.10635	2.70718	2.68263	2.31512	1.00387	1.15923	0.849344	1.38902	2.565	1.99043	0.710815	1.83015	2.48434	0.995077	0.743683	3.45613	3.79613
USP19	3.4245	3.40311	3.86704	4.6374	4.38217	3.82564	3.72786	3.26974	3.44496	3.64418	3.55018	3.21052	3.92338	4.15117	3.42586	3.76821	3.49935	3.21553	3.70933	3.71993	3.86543	3.69641	2.96738	3.24702	3.45836	2.94592	3.34105	3.53885	3.45882	2.92355	3.56406	3.48659	3.00307	3.31232	3.41554	2.96038	3.51496	3.4441	3.5624	3.64096	3.83112	4.22162	3.78419	2.83238	3.67673	3.27445	3.28382	3.40598	3.48418
USP2	0.109142	1.42338	0.593723	1.59276	0.689093	1.5619	0.296733	0.745305	1.01805	0.294611	0.879181	0.125399	1.27159	0.882659	1.41122	1.14689	0.657026	0.608136	2.22798	0.0817744	0.377526	2.51114	2.18639	1.1853	0.475714	0.260463	1.07146	1.12989	0.0686018	0.761925	0.410082	2.00914	0.530328	0.431088	0.140383	0.829433	0.376876	1.38891	2.35001	0.984136	0.643137	0.387146	2.31088	0.977687	0.158731	1.61714	0.558926	0.288949	0.982309
USP20	2.42687	3.00985	2.68173	2.75124	3.60707	2.83952	2.15761	3.47339	2.20071	2.19934	2.72633	1.82979	2.90289	3.20838	3.58115	2.62122	3.03656	1.32358	3.2166	2.79825	2.03758	3.37834	2.24779	3.38804	2.50811	2.02349	1.71689	2.79763	1.75719	2.24425	2.56809	2.92332	1.94995	2.83902	2.5563	1.98897	2.20613	2.62647	3.08736	2.21702	2.65432	2.42721	3.15191	2.62354	2.059	3.28702	2.60064	2.82007	2.48101
USP21	3.10841	3.35442	3.05354	3.41522	3.5541	3.54917	2.91922	3.13128	3.73535	3.68196	3.45538	2.98651	3.60864	3.6278	2.84514	3.54174	3.38008	2.79794	3.28419	3.90018	3.36127	3.9975	2.88913	2.53613	3.40793	2.7699	2.95354	2.97132	3.48248	3.12225	3.07758	3.20706	2.89558	3.48894	3.25805	3.22423	2.60625	3.38043	2.98674	2.86949	3.18353	2.81298	3.08366	3.14006	3.56824	3.04905	2.41489	3.99368	2.60227
USP22	4.59158	4.85842	4.88301	5.38652	5.32886	4.4556	5.35872	4.98057	4.661	4.97845	4.67867	3.7601	5.27744	4.47741	4.63569	4.62021	3.84079	4.77618	4.64826	5.01457	5.02873	5.59391	4.13453	4.4482	4.23845	4.09289	4.53466	4.76464	4.76375	4.23559	3.51279	4.12379	5.22438	4.1257	4.63858	3.64408	4.99391	5.24671	4.53968	4.31592	5.70816	4.33724	4.54056	3.59243	3.53718	4.39459	5.10603	4.55274	5.10111
USP24	2.57088	2.32375	3.20551	3.47608	3.17584	3.33605	3.14419	2.77635	2.9448	2.9642	2.52295	2.49262	3.94013	3.28211	2.61116	2.10119	3.07809	2.20904	2.55836	3.43074	3.33816	3.13269	2.23279	2.82461	3.0102	2.01053	2.65588	2.87585	2.53123	2.77048	2.87735	2.7866	3.83806	2.45584	3.33597	1.9959	3.03999	3.91484	2.50302	3.26098	3.89991	3.20393	2.45346	3.03738	2.79736	2.70729	2.94386	3.04014	3.37596
USP25	2.38502	1.96715	2.73494	2.78449	2.21058	2.63031	2.81025	2.72358	2.25939	2.16872	2.0311	2.21389	2.61818	2.85963	2.68797	1.6802	3.46859	1.6574	2.90372	2.94335	2.53522	2.43934	2.37086	2.97975	2.57028	1.80587	2.33592	2.76464	2.4308	2.57393	1.93079	2.89511	3.02884	2.22253	2.69837	1.98236	2.92097	2.61042	2.86171	1.99091	2.18198	2.6392	2.81557	2.524	2.80936	2.72802	2.39377	2.3799	3.16979
USP26	0	0	0	0.0559547	0.00444966	0.0152312	0.0850397	0.0109993	0.0124981	0	0	0.0081729	0	0	0	0.00564694	0.491235	0	0.0993483	0.121402	0	0.015407	0	0.00523117	0.00400065	0	0.00478514	0	0	0.0623395	0.0417788	0.0323958	0.0364666	0.00837342	0.00946412	0	0.00470749	0.0269477	0.0152823	0.0425218	0	0.00782022	0.0119459	0.521579	0	0.0783306	0	0	0.00322696
USP28	2.50603	2.46817	2.87732	3.14923	2.7056	2.63763	2.92765	2.70622	3.3284	2.37415	2.30805	2.41514	3.64224	2.59011	2.61424	1.68704	2.95645	1.5071	2.75433	3.21285	3.00199	2.34561	1.86668	2.45929	2.34928	1.8505	2.39232	2.44796	2.19888	1.76907	2.70035	2.62318	2.87925	2.71379	3.01374	2.16052	2.81954	3.05831	2.78646	2.15848	2.75222	3.25824	2.83689	1.99714	2.0439	2.62808	2.74388	2.70384	2.86154
USP3	2.58203	2.32842	3.1692	2.98327	2.2273	2.37783	2.46343	2.66872	2.85565	2.9213	2.29924	2.24756	3.07691	2.99509	2.24161	2.14307	2.57801	2.97975	2.3566	2.86108	2.67888	3.32814	2.02539	2.54707	3.04844	2.28175	2.84568	2.70241	2.41887	2.40021	1.96228	2.35478	3.33884	2.45817	2.46753	1.84999	2.93967	2.78882	2.24748	2.67214	3.01896	3.13702	2.39017	2.72032	2.91789	2.51583	2.68585	2.65652	2.89809
USP30	1.53386	1.99507	2.55951	2.36698	2.14927	1.75774	1.96465	2.30853	2.06806	1.85188	1.98805	1.85448	1.85269	2.20104	1.78508	1.89873	2.01966	2.1423	2.17104	2.5739	2.42546	3.38496	1.869	1.92052	1.65825	1.55628	2.39102	2.52232	2.30601	1.64193	0.940395	2.62572	1.68302	1.33074	1.97646	1.70581	1.71691	2.93734	1.97604	1.60192	2.24668	1.92818	1.99842	2.16857	1.23389	2.42631	1.78336	2.03504	1.83532
USP33	3.0365	2.35025	3.3491	3.40404	2.86611	2.84062	3.21371	2.7749	3.0226	2.29272	2.38156	2.30053	3.25732	3.48901	2.92064	2.21991	3.07546	2.08987	3.20101	3.4131	3.2068	3.40601	2.45923	2.95406	3.7476	2.48572	3.15263	3.0473	2.59021	2.87771	3.15073	3.27572	3.30907	2.9588	3.17454	2.22859	2.45275	2.9242	3.05596	3.50396	3.8909	3.42434	3.14536	2.54335	2.77096	2.85638	3.13307	2.98128	3.36915
USP34	1.8566	2.00361	2.59673	2.81434	2.56205	2.49998	2.47108	2.74605	2.92386	2.06533	1.60638	0.940497	2.97266	2.96506	2.89705	1.76898	2.56966	1.78381	2.97185	2.29398	2.20028	3.01033	1.98823	3.29582	2.42195	1.46007	1.9239	2.85028	1.78183	2.46903	2.27087	2.31495	3.2558	2.1576	2.52041	1.39471	4.03161	3.24901	2.91994	2.78332	3.09581	2.9616	2.85144	2.14315	2.4939	2.85045	3.37232	2.47665	2.97913
USP37	0.814537	1.32124	1.40958	1.77626	1.85492	0.881247	1.3235	1.43416	1.72449	1.19044	0.699559	1.11925	1.10928	1.63542	0.987226	1.1389	1.64272	0.909255	0.928819	1.41881	1.38464	2.3753	0.890276	0.85112	1.93168	0.559343	1.14861	1.05368	1.07409	1.01406	0.709052	1.72564	1.59169	0.656788	0.969962	0.494102	1.58951	1.88504	1.07525	1.22402	1.45351	1.61302	0.887175	1.52346	1.30272	0.949929	1.30727	1.11338	1.69911
USP4	3.01751	3.07676	3.18142	3.5171	3.62469	3.01827	3.35577	2.77762	2.72719	2.9258	3.17721	2.26614	3.07194	3.01935	2.98452	2.89007	3.13072	2.70588	3.11762	2.64468	2.12189	3.00792	2.83756	2.87449	2.88125	2.62711	2.535	3.02877	3.24331	2.82683	2.44354	2.86759	3.19133	3.17229	3.073	2.76789	3.06745	3.09451	3.00992	2.89648	2.71207	3.6295	2.91362	2.53595	3.29486	2.94729	3.15881	3.14489	3.38337
USP42	2.286	2.57634	2.4655	2.64265	2.25494	2.38717	2.14286	2.66606	2.6511	2.65964	2.1366	2.17512	3.29789	2.5791	2.25687	2.33634	2.63562	1.95111	2.05431	2.63484	2.32057	3.84669	1.83135	1.82549	3.06067	1.75999	2.36827	2.48838	2.04876	1.80635	2.86594	2.81848	2.39399	2.81531	2.62236	2.1989	2.4253	3.31646	2.0682	2.51283	3.19299	2.48012	2.20004	2.86129	2.41893	2.21392	2.55956	2.83656	2.39477
USP44	0.0333273	0.163432	0.0211844	0.472333	0.00684313	0.0868875	0.199659	0.160659	0.169913	0.0235471	0.154043	0.0342813	0.0204023	0.0927235	0.548388	0.0386662	0.585155	0.0370093	0.547449	0.258878	0.0142812	0.0886133	0.0724155	0.456082	0.555967	0.0119758	0.0684361	0.107908	0.076846	0.151138	0.0507492	0.241543	0.202935	0.114866	0.0643118	0.101796	0.167676	0.506694	0.517657	0.169039	0.0647164	0.0591189	0.514727	1.26994	0.00723182	0.445642	0.215897	0.0944356	0.220872
USP47	2.26124	2.12019	3.03558	2.76842	2.66121	3.09543	2.86097	2.80169	3.29009	2.25008	2.18722	2.43077	3.21209	3.046	3.3377	2.15991	3.20389	2.58737	3.32701	2.99463	2.91493	3.46644	2.33869	3.64056	2.93224	2.08509	2.79111	2.96894	2.40437	2.75303	2.62209	2.93569	3.38205	2.56597	2.97709	2.09989	3.02915	3.38173	3.05611	2.88328	2.94	3.10263	3.24812	2.36637	1.94085	3.25482	3.07668	2.66264	3.09463
USP48	2.6587	2.16294	3.09075	2.34564	2.6931	2.06304	2.95705	2.19244	3.00977	2.58996	2.34703	3.02214	2.64452	3.01435	2.68223	2.64972	2.80392	2.10891	2.63392	2.93934	3.17746	2.78947	1.98131	2.60326	2.54942	2.19042	2.87655	2.64332	2.15237	2.76065	3.3292	2.68388	3.34506	3.48432	2.86525	2.57767	3.04227	3.04262	2.6118	1.9614	3.62803	3.29903	2.49297	2.80067	2.29787	2.4553	2.52238	2.16063	2.96172
USP49	0.482978	0.751383	0.646512	0.810004	1.03349	0.659251	0.842384	0.802684	0.883921	0.527555	0.381589	0.594498	0.63573	0.602671	0.772773	0.86525	1.16265	0.322863	0.874999	0.932626	0.946558	1.82434	0.454856	0.913612	1.66692	0.269685	0.391172	0.861287	0.900034	0.736562	0.635871	0.802156	0.720477	0.821895	0.717636	0.383866	1.01589	1.55967	0.849303	0.528843	1.93627	0.726814	0.906238	1.10129	0.560331	0.802579	1.02328	1.13193	0.618648
USP5	4.54276	4.81683	4.79084	4.99243	4.65282	5.23073	4.97053	4.14684	4.16629	5.2279	4.62673	4.03641	5.11784	4.56527	4.19489	5.0099	4.58046	4.31098	4.05643	4.76791	4.78305	4.94744	4.10174	3.89459	3.67525	4.06985	4.64331	4.31555	4.55713	3.86307	4.29388	4.61396	3.96478	3.78588	4.8064	4.29329	4.24389	4.70766	4.03029	4.63086	4.72468	4.83328	4.11073	4.18606	4.42546	4.17744	4.15806	4.2995	4.38178
USP7	3.65851	3.88053	4.60246	4.02864	4.76567	3.89108	4.60319	3.65216	4.47263	3.71106	3.7434	4.27175	4.19839	4.41567	3.74	3.67563	3.87022	3.99553	3.72336	4.23509	4.43124	4.63299	3.53225	3.7389	3.92829	3.20823	4.18637	3.8312	3.54834	3.84761	4.14851	4.22439	4.31667	3.48351	4.46283	3.32318	4.7161	3.34756	3.6212	4.81075	4.76244	4.40144	3.80278	3.82421	3.88053	3.80582	3.90369	4.11402	4.04645
USP8	1.91525	1.50265	1.56451	2.34201	1.9868	1.76774	2.27769	2.1606	2.37596	1.82779	1.84429	2.27752	2.28292	2.27854	2.14844	1.41842	2.02004	1.96217	1.9899	2.34849	2.36949	2.28598	1.75297	2.11715	1.98822	1.77994	2.13231	2.13103	1.49514	2.19413	1.73781	1.89334	2.26436	2.22618	2.04892	1.45261	2.28277	1.98783	2.01836	2.1645	2.37586	2.18564	2.10085	2.27206	1.50718	1.92653	2.1438	2.0298	2.03179
USP9X	3.2703	4.35805	4.93821	3.87755	3.74205	3.24138	3.93151	3.89212	4.04016	2.93882	2.95301	2.89698	4.16018	3.9909	3.65518	3.89899	4.07724	4.56104	3.73337	3.64711	3.57072	4.23427	3.04842	4.02676	3.49097	2.60114	4.04784	4.34739	2.78635	3.63401	4.08469	4.66136	4.2178	2.97002	3.76915	2.47104	4.67641	4.17748	3.53336	3.83185	4.11707	4.06376	3.74165	2.5027	3.17945	4.05467	4.21249	3.42341	3.90635
VCP	5.94848	6.34696	5.22825	5.96221	7.33623	5.51263	6.05829	5.88186	5.80052	6.35046	5.72636	5.17839	6.34391	5.58567	5.34349	5.34425	5.7291	6.22157	5.2662	5.83583	5.78525	5.55444	5.58527	5.04498	5.94696	5.32996	5.66996	5.66827	5.25362	5.11091	6.4471	6.07047	5.74491	5.6259	6.17466	6.07431	5.6841	5.30212	5.09942	6.3634	5.8655	6.09774	5.06243	5.51881	5.7785	5.38451	5.94458	5.91696	6.03679
VCPIP1	1.74623	2.06844	2.33729	2.63706	3.0544	3.051	2.26171	2.4349	3.06956	2.19707	1.91946	2.38197	2.78281	2.79289	2.1586	1.88734	2.21411	1.76943	1.96237	2.55819	2.69059	2.48738	1.66851	2.19733	2.39138	1.477	2.04822	2.36928	2.07681	2.03798	1.91906	2.53037	2.61505	2.21345	2.51558	1.39465	2.49388	2.58103	1.85933	2.56069	2.71964	2.53001	2.01853	3.4251	1.95263	2.42223	2.45902	2.17183	2.67045
VDAC1	6.8052	5.83335	6.85194	6.35186	5.17655	6.53621	6.64319	5.86859	6.73422	6.83369	6.55207	6.80303	6.55344	6.877	5.14198	5.72177	5.98781	7.34078	4.55752	6.92166	7.56235	6.0262	5.68928	4.67681	5.9966	6.34685	7.03327	6.1678	7.17683	5.7305	6.32997	6.56826	6.66858	6.48057	5.77424	6.73586	6.63831	6.16517	4.56771	6.67902	6.36567	6.54397	4.63653	6.62699	5.71181	5.46639	5.91246	6.34059	6.46507
VDAC2	5.63198	5.3957	6.29291	4.8848	4.90233	5.22022	5.43095	5.3316	4.80243	5.83525	5.54437	6.17622	3.74323	5.67624	4.92462	4.37798	4.79342	4.91588	5.51859	5.31271	6.55725	5.55921	6.29299	5.06103	6.76453	5.72342	6.346	4.83772	6.76509	5.79775	5.25998	5.53686	5.12693	6.20306	5.91558	5.99016	4.84697	4.78107	5.2821	6.57148	4.74612	5.36852	5.56519	4.99645	5.21779	5.32737	4.12817	6.45704	5.38126
VDAC3	4.88941	5.12625	5.44262	4.03772	3.59986	3.8999	5.07388	3.55688	5.09275	5.97634	5.33118	6.19591	4.20486	4.96521	4.34393	3.73805	3.75821	4.85803	4.53032	5.23485	6.19293	3.51509	3.81027	4.46076	4.56936	4.23228	5.26608	4.59073	4.89636	4.35802	4.81299	5.29248	5.82255	4.72072	5.64293	4.40097	4.00278	4.65102	4.41988	4.7759	4.26629	4.98407	4.59493	3.89243	4.63229	4.36209	3.8505	3.80023	5.46064
VHL	2.97482	2.77127	3.47963	4.41802	3.99738	4.23327	4.1372	3.74796	3.74149	3.92321	3.66996	3.49913	3.24145	3.8122	3.55851	3.54554	3.72195	3.76852	3.05787	4.63387	4.43316	4.70841	3.15757	2.8038	3.66164	2.60985	3.59074	3.79998	3.60937	2.92875	4.21256	3.38732	3.68321	4.39634	3.35528	3.29691	3.194	2.85898	3.20441	3.54634	3.45482	4.20276	3.15948	3.31121	4.37183	3.20332	3.45445	3.41654	2.86851
WAC	3.57377	3.55859	3.78228	3.57779	4.21338	4.03584	3.73818	3.76465	3.81312	3.4684	3.20392	3.23143	3.7918	3.70251	3.82769	3.10699	4.00603	3.50538	4.08687	4.05502	3.70694	3.64407	3.31849	3.74731	3.3114	3.01695	3.70675	3.51225	4.07605	3.71607	3.68523	3.96163	4.22847	3.99002	3.56549	3.00879	3.40132	4.07737	3.89677	3.71414	3.91049	4.0258	3.95135	4.05875	3.32921	3.85687	3.73441	3.81595	3.79755
WDR20	1.8907	1.66518	1.89875	1.83116	1.74721	1.70259	1.96983	1.42263	2.17542	2.05544	1.80218	1.71226	1.93069	1.99081	1.71776	1.82194	1.69704	1.90276	1.7072	2.21719	1.93261	2.02536	1.64793	1.49909	1.15696	1.46058	1.99905	1.78508	1.36641	1.727	2.08294	1.82361	2.17046	1.68595	1.89222	1.65394	2.12157	1.668	1.65922	1.95533	2.07645	1.78093	1.77884	1.76892	1.77758	1.59232	1.87419	1.8278	1.90731
WDR48	2.51193	2.30627	3.47397	3.18109	3.51656	2.21016	2.8115	2.52758	2.38157	2.07543	2.12136	2.61643	2.10732	2.82955	2.71891	1.76782	2.46441	2.43374	2.71104	2.93735	2.47458	2.65658	2.10441	2.78612	2.95327	1.81482	2.3617	2.58585	2.71508	2.23364	2.54465	2.31652	3.10236	2.31596	2.61625	1.81236	3.1548	3.20477	2.62935	2.14218	2.5938	3.04956	2.78767	2.26904	2.25017	2.63582	2.34225	2.34952	3.00798
WDR61	2.62332	1.54822	2.80168	2.31729	2.7632	1.82309	2.46923	2.24135	2.55425	2.31166	2.0861	2.39789	2.55478	2.20656	2.05546	1.76302	2.16793	2.50321	2.44277	2.44126	2.89832	2.81902	2.28912	2.12752	1.72557	1.79885	2.68899	2.19643	2.65699	2.34657	2.5096	2.01133	2.54648	2.154	2.58758	2.57462	2.67913	2.55601	2.15854	2.07877	2.37371	2.20974	2.08841	2.46832	2.93553	2.17992	2.03758	2.35916	2.4641
WFS1	2.96701	5.34207	3.1171	3.82964	5.27627	3.24855	4.72353	4.18465	4.34691	3.55414	3.63908	2.58904	3.67444	3.87351	4.81542	5.55696	2.78344	2.77285	5.18829	4.14584	3.77981	3.61373	3.00651	4.7524	3.63381	3.36337	3.52852	4.12066	1.96069	3.67716	2.94684	3.97693	1.96048	3.80812	3.21624	3.4778	5.23316	3.00178	5.26738	3.19182	4.18301	3.5296	5.226	3.07574	3.61802	4.95696	3.89216	3.04987	3.52502
WSB1	2.50526	2.2525	3.26739	3.39142	2.99738	3.55297	3.08574	3.00787	3.35875	2.23549	2.80576	2.87418	3.45097	3.16438	4.08571	2.56031	3.22078	3.04267	3.67885	3.17841	3.19368	3.14596	2.68139	4.54638	3.09674	2.07374	3.02532	3.58145	2.86985	3.05282	3.77212	3.33846	3.98786	3.12324	3.11024	1.80778	3.66387	4.4113	4.05025	2.94962	3.60509	3.67381	3.98795	3.98534	2.46137	3.6544	4.03225	3.32567	3.17973
WWP1	2.96604	2.77204	3.72444	3.05971	3.71025	4.26489	3.37524	3.46742	3.91674	4.00814	3.36337	3.6476	3.35636	4.06945	3.1074	3.7557	3.07613	2.93938	3.12839	4.23798	3.37863	3.53651	2.7869	3.12016	4.01369	2.79153	4.49435	4.17426	3.0359	3.51821	2.72595	3.59893	3.97917	3.55108	4.17568	2.57952	4.23887	4.48988	3.27819	3.32047	3.36551	3.6181	3.21929	4.37069	3.43062	3.50405	3.12704	3.32679	3.78511
WWP2	3.11213	2.95691	3.78257	3.74034	3.11005	3.16854	3.52337	2.95782	3.45205	3.91574	3.5101	2.1331	4.15412	3.95181	2.46039	2.72736	3.98901	2.7044	2.34261	3.428	3.36618	3.46027	3.08047	2.20821	5.23546	3.38228	3.252	3.64584	3.4693	3.4955	4.36483	3.10856	3.12257	3.3695	3.54569	2.61174	2.69074	3.07185	2.66084	3.57401	3.76111	3.91228	2.11643	3.02426	3.72215	2.57852	2.94238	3.45362	3.33797
XIAP	2.36888	2.78738	2.98756	3.41205	3.77211	2.72775	3.25121	3.85301	3.8589	2.39886	2.42397	2.91631	3.82694	3.72696	3.23192	2.67239	3.09264	2.68229	2.94532	4.50846	3.19959	4.44033	2.46786	2.75221	4.7017	2.54602	3.26415	3.72026	4.02346	2.71747	3.61895	3.25745	3.15583	4.03411	3.06046	2.35253	3.45787	2.85943	2.94314	3.47289	2.96248	2.80218	3.16507	3.59829	3.6516	3.11289	3.06519	2.95485	2.80735
YOD1	1.36352	1.07232	2.17915	1.474	2.67711	2.2746	1.98895	1.82597	3.54018	1.80657	0.816073	1.5774	3.31781	2.7025	1.30831	0.983462	2.44335	2.62223	1.36775	2.7961	2.26185	1.85171	3.38699	1.39894	3.7325	1.45151	2.48747	1.51498	1.77104	2.55505	2.81659	1.34154	3.62479	2.74731	3.42987	1.86845	2.13845	2.41121	1.33128	2.93564	3.08662	3.41107	1.29064	2.44079	2.47871	1.34496	1.82182	2.19322	2.99049
YY1	3.99237	3.77837	4.15595	4.42388	4.73967	4.11476	4.15249	4.20493	4.43483	3.90178	3.95628	3.89049	4.16203	4.26089	4.01438	3.99102	4.08968	4.08896	3.99243	4.73367	3.91272	4.62957	3.52869	3.78769	3.18556	3.32928	4.42723	3.8289	4.22915	4.0785	3.84915	3.74598	3.99867	4.06424	4.31204	4.03023	4.07277	4.15051	3.87554	3.71026	4.92429	3.91402	4.08425	4.47691	4.56051	3.80927	3.94938	3.74926	4.17816
ZBTB16	0.100882	1.2129	0.0297551	0.300449	0.00289608	0.229712	0.0623195	2.51497	0.533188	0.0473738	0.75678	0.0904096	0.292449	0.264126	1.32917	0.0647737	1.1391	0.0179943	3.30679	0.0442544	0.0240607	1.34814	1.72384	2.55803	0.105501	0.739278	0.0247301	0.724017	0.0715819	0.552647	0.133772	1.39461	0.0855033	1.13771	0.0693384	0.350805	0.504702	0.559168	2.4065	0.141601	0.453576	0.312889	2.46181	0.408389	0.109136	0.572785	2.3862	0.513478	0.61511
ZNRF1	3.02995	1.83601	1.87974	1.86845	1.5487	2.0586	2.86985	1.59604	1.58886	2.08004	1.96545	2.03362	2.10646	2.17293	2.16165	2.75992	2.3379	2.47065	2.24752	2.24193	2.17109	2.00876	2.94579	2.04596	1.67007	1.97101	1.83544	2.13069	2.93364	2.72145	2.64504	1.88886	1.4455	2.31212	1.92698	1.98971	1.35084	1.64249	2.07605	1.61811	2.3921	2.63216	2.54256	1.41596	3.0983	2.00911	1.70101	1.92447	1.67831
ZNRF2	3.36972	4.31742	2.91293	3.43962	3.167	3.02279	2.57502	3.05755	3.26933	4.6584	3.19347	2.55669	3.95102	3.67155	2.71642	4.02265	3.60789	3.95093	2.13603	3.26192	3.37499	4.4347	3.06459	2.15134	2.9193	3.26669	3.77863	3.62785	3.24774	3.23743	4.01979	3.94113	3.84486	3.65127	3.4114	3.10401	3.05399	3.41628	2.06377	4.15951	3.57262	3.4562	2.43081	3.73934	3.39155	2.67184	2.70745	3.39442	3.34143
ZRANB1	1.33496	1.96109	1.61171	1.97331	2.64913	1.53812	1.79914	2.30206	1.95101	1.46305	1.41641	0.680904	1.4467	2.03505	2.28935	3.89397	2.08488	1.54016	2.39047	1.97595	1.67644	3.24682	2.01029	2.32476	3.34474	1.19911	1.46475	1.87176	1.88631	1.5815	1.46	2.58098	2.24451	1.38204	1.60484	1.04906	2.10293	2.31763	2.47678	1.82567	2.37889	1.98428	2.53843	1.43365	1.0733	2.27082	2.29456	1.77898	2.18873
[truncated: 358 more columns]
