# Supplementary figures and images for: A ubiquitination-related risk model for predicting the prognosis and immunotherapy response of gastric adenocarcinoma patients
Source: PeerJ journal article supplement (doi:10.7717/peerj.16868), 2024-01-31

# qPCR

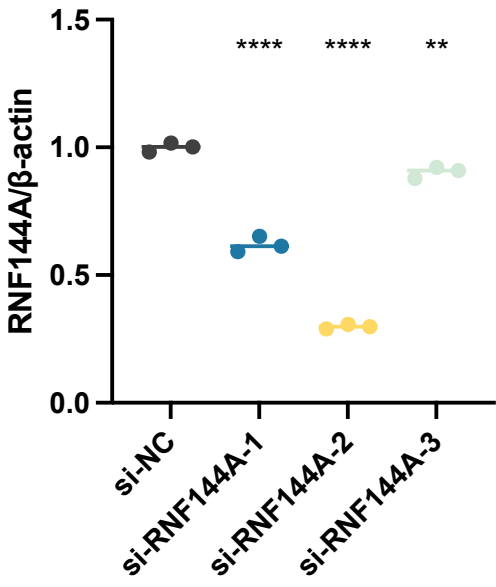

Supplement: Figure_8A.zip [file Figure_8A.zip]

# Transwell

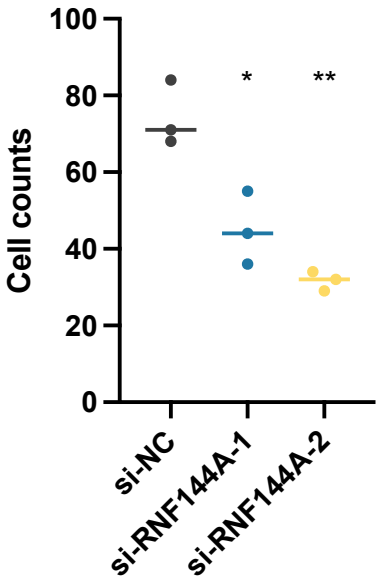

Supplement: Figures_8E_and_8F.zip [file Figures_8E_and_8F.zip]
